# Supplementary material
Source: publisher figshare collection journal article supplement (https://gsajournals.figshare.com/ndownloader/files/10799198)
Supplement: Supplementary file 1 [file 10799198]

## Sheet: GWAS trial
Set	Year	Replication	Accession Number	Alias	Timepoint	Weeks Post-Inoculation	Date	Score
GWAS	2016	A	00C003P602	00C003P602	1	4	06.01.2016	1
GWAS	2016	A	00C018P601	00C018P601	1	4	06.01.2016	5
GWAS	2016	A	00C027P601	00C027P601	1	4	06.01.2016	5
GWAS	2016	A	00C038P606	00C038P606	1	4	06.01.2016	1
GWAS	2016	A	00C046P601	00C046P601	1	4	06.01.2016	2
GWAS	2016	A	00C057P613	00C057P613	1	4	06.01.2016	1
GWAS	2016	A	00C139P003	00C139P003	1	4	06.01.2016	2.5
GWAS	2016	A	01C053P602	01C053P602	1	4	06.01.2016	1
GWAS	2016	A	01C057P601	01C057P601	1	4	06.01.2016	1
GWAS	2016	A	01C080P602	01C080P602	1	4	06.01.2016	1
GWAS	2016	A	01C111P004	01C111P004	1	4	06.01.2016	1
GWAS	2016	A	01C134P001	01C134P001	1	4	06.01.2016	5
GWAS	2016	A	01C134P003	01C134P003	1	4	06.01.2016	4
GWAS	2016	A	01C136P001	01C136P001	1	4	06.01.2016	1
GWAS	2016	A	01C138P001	01C138P001	1	4	06.01.2016	2
GWAS	2016	A	01C141P002	01C141P002	1	4	06.01.2016	1
GWAS	2016	A	01C158P001	01C158P001	1	4	06.01.2016	1
GWAS	2016	A	01C203P006	01C203P006	1	4	06.01.2016	1
GWAS	2016	A	02C068P608	02C068P608	1	4	06.01.2016	3
GWAS	2016	A	02C093P006	02C093P006	1	4	06.01.2016	2.5
GWAS	2016	A	02C095P004	02C095P004	1	4	06.01.2016	2
GWAS	2016	A	02C103P002	02C103P002	1	4	06.01.2016	1
GWAS	2016	A	02C132P006	02C132P006	1	4	06.01.2016	2
GWAS	2016	A	02C134P003	02C134P003	1	4	06.01.2016	5
GWAS	2016	A	02C143P003	02C143P003	1	4	06.01.2016	NA
GWAS	2016	A	02C144P003	02C144P003	1	4	06.01.2016	2
GWAS	2016	A	02C156P003	02C156P003	1	4	06.01.2016	2.5
GWAS	2016	A	02C229P001	02C229P001	1	4	06.01.2016	2
GWAS	2016	A	02C230P001	02C230P001	1	4	06.01.2016	1
GWAS	2016	A	03C001P606	03C001P606	1	4	06.01.2016	1
GWAS	2016	A	03C065P601	03C065P601	1	4	06.01.2016	1
GWAS	2016	A	03C075P601	03C075P601	1	4	06.01.2016	3
GWAS	2016	A	03C092P008	03C092P008	1	4	06.01.2016	1
GWAS	2016	A	03C102P002	03C102P002	1	4	06.01.2016	1
GWAS	2016	A	03C111P005	03C111P005	1	4	06.01.2016	3
GWAS	2016	A	03C114P003	03C114P003	1	4	06.01.2016	2.5
GWAS	2016	A	03C132P003	03C132P003	1	4	06.01.2016	2.5
GWAS	2016	A	03C149P008	03C149P008	1	4	06.01.2016	2.5
GWAS	2016	A	04C001P601	04C001P601	1	4	06.01.2016	4.5
GWAS	2016	A	04C009P005	04C009P005	1	4	06.01.2016	3
GWAS	2016	A	04C013P604	04C013P604	1	4	06.01.2016	2.5
GWAS	2016	A	04C018P004	04C018P004	1	4	06.01.2016	1
GWAS	2016	A	04C020P604	04C020P604	1	4	06.01.2016	NA
GWAS	2016	A	04C038P603	04C038P603	1	4	06.01.2016	1
GWAS	2016	A	04C041P006	04C041P006	1	4	06.01.2016	1
GWAS	2016	A	04C041P007	04C041P007	1	4	06.01.2016	1
GWAS	2016	A	04C045P605	04C045P605	1	4	06.01.2016	4
GWAS	2016	A	04C053P001	04C053P001	1	4	06.01.2016	2.5
GWAS	2016	A	04C056P608	04C056P608	1	4	06.01.2016	2.5
GWAS	2016	A	04C073P002	04C073P002	1	4	06.01.2016	3.5
GWAS	2016	A	04C076P004	04C076P004	1	4	06.01.2016	1
GWAS	2016	A	04C077P002	04C077P002	1	4	06.01.2016	1
GWAS	2016	A	04C085P601	04C085P601	1	4	06.01.2016	1
GWAS	2016	A	05C027P605	05C027P605	1	4	06.01.2016	2.5
GWAS	2016	A	05C054P611	05C054P611	1	4	06.01.2016	2.5
GWAS	2016	A	05C065P608	05C065P608	1	4	06.01.2016	1
GWAS	2016	A	05C092P011	05C092P011	1	4	06.01.2016	5
GWAS	2016	A	05C095P004	05C095P004	1	4	06.01.2016	4.5
GWAS	2016	A	05C097P007	05C097P007	1	4	06.01.2016	4
GWAS	2016	A	05C099P006	05C099P006	1	4	06.01.2016	2.5
GWAS	2016	A	05C106P002	05C106P002	1	4	06.01.2016	2.5
GWAS	2016	A	05C107P002	05C107P002	1	4	06.01.2016	3.5
GWAS	2016	A	05C108P007	05C108P007	1	4	06.01.2016	2
GWAS	2016	A	05C109P002	05C109P002	1	4	06.01.2016	5
GWAS	2016	A	05C115P005	05C115P005	1	4	06.01.2016	1
GWAS	2016	A	05C117P005	05C117P005	1	4	06.01.2016	1
GWAS	2016	A	05C120P009	05C120P009	1	4	06.01.2016	4.5
GWAS	2016	A	05C132P001	05C132P001	1	4	06.01.2016	4
GWAS	2016	A	05C144P003	05C144P003	1	4	06.01.2016	1.5
GWAS	2016	A	05C148P002	05C148P002	1	4	06.01.2016	1
GWAS	2016	A	05C154P002	05C154P002	1	4	06.01.2016	1.5
GWAS	2016	A	05C165P001	05C165P001	1	4	06.01.2016	5
GWAS	2016	A	05C172P002	05C172P002	1	4	06.01.2016	2
GWAS	2016	A	05C194P001	05C194P001	1	4	06.01.2016	5
GWAS	2016	A	05C197P002	05C197P002	1	4	06.01.2016	1
GWAS	2016	A	05C199P010	05C199P010	1	4	06.01.2016	5
GWAS	2016	A	05C205P002	05C205P002	1	4	06.01.2016	2
GWAS	2016	A	05C206P005	05C206P005	1	4	06.01.2016	5
GWAS	2016	A	06C016P602	06C016P602	1	4	06.01.2016	2.5
GWAS	2016	A	06C020P605	06C020P605	1	4	06.01.2016	1
GWAS	2016	A	06C043P603	06C043P603	1	4	06.01.2016	3.5
GWAS	2016	A	06C050P611	06C050P611	1	4	06.01.2016	4
GWAS	2016	A	06C051P609	06C051P609	1	4	06.01.2016	5
GWAS	2016	A	06C066P603	06C066P603	1	4	06.01.2016	3
GWAS	2016	A	06C090P605	06C090P605	1	4	06.01.2016	2.5
GWAS	2016	A	06C102P002	06C102P002	1	4	06.01.2016	4.5
GWAS	2016	A	06C106P002	06C106P002	1	4	06.01.2016	5
GWAS	2016	A	06C109P003	06C109P003	1	4	06.01.2016	5
GWAS	2016	A	06C110P004	06C110P004	1	4	06.01.2016	NA
GWAS	2016	A	06C111P001	06C111P001	1	4	06.01.2016	5
GWAS	2016	A	06C132P001	06C132P001	1	4	06.01.2016	2
GWAS	2016	A	06C132P002	06C132P002	1	4	06.01.2016	1
GWAS	2016	A	06C137P002	06C137P002	1	4	06.01.2016	2
GWAS	2016	A	06C202P001	06C202P001	1	4	06.01.2016	5
GWAS	2016	A	06C204P001	06C204P001	1	4	06.01.2016	1
GWAS	2016	A	07C001P608	07C001P608	1	4	06.01.2016	1
GWAS	2016	A	07C009P601	07C009P601	1	4	06.01.2016	3
GWAS	2016	A	07C043P001	07C043P001	1	4	06.01.2016	1.5
GWAS	2016	A	07C049P003	07C049P003	1	4	06.01.2016	1
GWAS	2016	A	07C050P601	07C050P601	1	4	06.01.2016	1
GWAS	2016	A	07C064P002	07C064P002	1	4	06.01.2016	2
GWAS	2016	A	07C064P003	07C064P003	1	4	06.01.2016	1
GWAS	2016	A	07C064P005	07C064P005	1	4	06.01.2016	3.5
GWAS	2016	A	07C067P608	07C067P608	1	4	06.01.2016	5
GWAS	2016	A	07C090P606	07C090P606	1	4	06.01.2016	2.5
GWAS	2016	A	07C092P003	07C092P003	1	4	06.01.2016	1
GWAS	2016	A	07C119P001	07C119P001	1	4	06.01.2016	1
GWAS	2016	A	07C120P003	07C120P003	1	4	06.01.2016	1
GWAS	2016	A	07C134P001	07C134P001	1	4	06.01.2016	1
GWAS	2016	A	07C141P001	07C141P001	1	4	06.01.2016	4
GWAS	2016	A	07C148P001	07C148P001	1	4	06.01.2016	2
GWAS	2016	A	07C148P003	07C148P003	1	4	06.01.2016	2
GWAS	2016	A	07C203P001	07C203P001	1	4	06.01.2016	2.5
GWAS	2016	A	07C216P001	07C216P001	1	4	06.01.2016	1
GWAS	2016	A	08C005P601	08C005P601	1	4	06.01.2016	3.5
GWAS	2016	A	08C013P605	08C013P605	1	4	06.01.2016	5
GWAS	2016	A	08C013P606	08C013P606	1	4	06.01.2016	1.5
GWAS	2016	A	08C017P005	08C017P005	1	4	06.01.2016	5
GWAS	2016	A	08C018P005	08C018P005	1	4	06.01.2016	2
GWAS	2016	A	08C037P603	08C037P603	1	4	06.01.2016	1
GWAS	2016	A	08C043P001	08C043P001	1	4	06.01.2016	2
GWAS	2016	A	08C043P004	08C043P004	1	4	06.01.2016	5
GWAS	2016	A	08C043P010	08C043P010	1	4	06.01.2016	1
GWAS	2016	A	08C075P001	08C075P001	1	4	06.01.2016	4
GWAS	2016	A	08C114P005	08C114P005	1	4	06.01.2016	4
GWAS	2016	A	08C123P001	08C123P001	1	4	06.01.2016	5
GWAS	2016	A	08C124P001	08C124P001	1	4	06.01.2016	2.5
GWAS	2016	A	08C128P002	08C128P002	1	4	06.01.2016	1
GWAS	2016	A	08C129P004	08C129P004	1	4	06.01.2016	2
GWAS	2016	A	08C131P003	08C131P003	1	4	06.01.2016	1
GWAS	2016	A	08C132P003	08C132P003	1	4	06.01.2016	2.5
GWAS	2016	A	08C135P004	08C135P004	1	4	06.01.2016	2.5
GWAS	2016	A	08C137P001	08C137P001	1	4	06.01.2016	2
GWAS	2016	A	08C137P002	08C137P002	1	4	06.01.2016	2.5
GWAS	2016	A	08C138P003	08C138P003	1	4	06.01.2016	1
GWAS	2016	A	08C150P009	08C150P009	1	4	06.01.2016	5
GWAS	2016	A	08C182P002	08C182P002	1	4	06.01.2016	3
GWAS	2016	A	09C012P605	09C012P605	1	4	06.01.2016	4.5
GWAS	2016	A	09C016P601	09C016P601	1	4	06.01.2016	1
GWAS	2016	A	09C020P609	09C020P609	1	4	06.01.2016	1
GWAS	2016	A	09C032P605	09C032P605	1	4	06.01.2016	5
GWAS	2016	A	09C037P001	09C037P001	1	4	06.01.2016	2.5
GWAS	2016	A	09C048P003	09C048P003	1	4	06.01.2016	1
GWAS	2016	A	09C056P608	09C056P608	1	4	06.01.2016	5
GWAS	2016	A	09C061P602	09C061P602	1	4	06.01.2016	2
GWAS	2016	A	09C061P606	09C061P606	1	4	06.01.2016	1
GWAS	2016	A	09C062P001	09C062P001	1	4	06.01.2016	1
GWAS	2016	A	09C068P602	09C068P602	1	4	06.01.2016	5
GWAS	2016	A	09C078P603	09C078P603	1	4	06.01.2016	5
GWAS	2016	A	09C085P002	09C085P002	1	4	06.01.2016	2
GWAS	2016	A	09C085P601	09C085P601	1	4	06.01.2016	2.5
GWAS	2016	A	09C088P602	09C088P602	1	4	06.01.2016	1
GWAS	2016	A	09C091P001	09C091P001	1	4	06.01.2016	1
GWAS	2016	A	09C097P003	09C097P003	1	4	06.01.2016	1
GWAS	2016	A	09C100P003	09C100P003	1	4	06.01.2016	2
GWAS	2016	A	09C103P002	09C103P002	1	4	06.01.2016	5
GWAS	2016	A	09C108P002	09C108P002	1	4	06.01.2016	4
GWAS	2016	A	09C132P003	09C132P003	1	4	06.01.2016	1
GWAS	2016	A	09C141P001	09C141P001	1	4	06.01.2016	1
GWAS	2016	A	09C154P605	09C154P605	1	4	06.01.2016	5
GWAS	2016	A	09C166P007	09C166P007	1	4	06.01.2016	3
GWAS	2016	A	09C171P602	09C171P602	1	4	06.01.2016	4
GWAS	2016	A	09C180P001	09C180P001	1	4	06.01.2016	2.5
GWAS	2016	A	10C001P604	10C001P604	1	4	06.01.2016	5
GWAS	2016	A	10C005P602	10C005P602	1	4	06.01.2016	2
GWAS	2016	A	10C007P003	10C007P003	1	4	06.01.2016	1
GWAS	2016	A	10C012P003	10C012P003	1	4	06.01.2016	2
GWAS	2016	A	10C015P605	10C015P605	1	4	06.01.2016	1
GWAS	2016	A	10C017P001	10C017P001	1	4	06.01.2016	1
GWAS	2016	A	10C017P002	10C017P002	1	4	06.01.2016	1
GWAS	2016	A	10C023P001	10C023P001	1	4	06.01.2016	5
GWAS	2016	A	10C024P002	10C024P002	1	4	06.01.2016	5
GWAS	2016	A	10C025P601	10C025P601	1	4	06.01.2016	5
GWAS	2016	A	10C030P001	10C030P001	1	4	06.01.2016	3
GWAS	2016	A	10C031P602	10C031P602	1	4	06.01.2016	3
GWAS	2016	A	10C037P604	10C037P604	1	4	06.01.2016	5
GWAS	2016	A	10C038P601	10C038P601	1	4	06.01.2016	2
GWAS	2016	A	10C070P611	10C070P611	1	4	06.01.2016	5
GWAS	2016	A	10C077P601	10C077P601	1	4	06.01.2016	5
GWAS	2016	A	10C078P603	10C078P603	1	4	06.01.2016	2.5
GWAS	2016	A	10C080P605	10C080P605	1	4	06.01.2016	3
GWAS	2016	A	10C081P001	10C081P001	1	4	06.01.2016	5
GWAS	2016	A	10C087P002	10C087P002	1	4	06.01.2016	5
GWAS	2016	A	10C099P001	10C099P001	1	4	06.01.2016	3
GWAS	2016	A	10C105P001	10C105P001	1	4	06.01.2016	1
GWAS	2016	A	10C106P001	10C106P001	1	4	06.01.2016	1
GWAS	2016	A	10C106P008	10C106P008	1	4	06.01.2016	5
GWAS	2016	A	10C116P001	10C116P001	1	4	06.01.2016	3
GWAS	2016	A	10C122P003	10C122P003	1	4	06.01.2016	1
GWAS	2016	A	10C122P006	10C122P006	1	4	06.01.2016	1
GWAS	2016	A	10C124P002	10C124P002	1	4	06.01.2016	4
GWAS	2016	A	10C126P003	10C126P003	1	4	06.01.2016	5
GWAS	2016	A	10C127P001	10C127P001	1	4	06.01.2016	5
GWAS	2016	A	10C134P004	10C134P004	1	4	06.01.2016	2.5
GWAS	2016	A	10C136P004	10C136P004	1	4	06.01.2016	5
GWAS	2016	A	10C137P005	10C137P005	1	4	06.01.2016	5
GWAS	2016	A	10C140P001	10C140P001	1	4	06.01.2016	5
GWAS	2016	A	10C141P001	10C141P001	1	4	06.01.2016	4
GWAS	2016	A	10C143P001	10C143P001	1	4	06.01.2016	2
GWAS	2016	A	10C144P001	10C144P001	1	4	06.01.2016	1
GWAS	2016	A	10C144P002	10C144P002	1	4	06.01.2016	1
GWAS	2016	A	10C144P003	10C144P003	1	4	06.01.2016	2
GWAS	2016	A	10C160P001	10C160P001	1	4	06.01.2016	1
GWAS	2016	A	10C160P009	10C160P009	1	4	06.01.2016	NA
GWAS	2016	A	10C169P001	10C169P001	1	4	06.01.2016	4.5
GWAS	2016	A	10C187P004	10C187P004	1	4	06.01.2016	1
GWAS	2016	A	11C021P001	11C021P001	1	4	06.01.2016	1
GWAS	2016	A	11C032P002	11C032P002	1	4	06.01.2016	2
GWAS	2016	A	11C034P605	11C034P605	1	4	06.01.2016	5
GWAS	2016	A	11C036P601	11C036P601	1	4	06.01.2016	2.5
GWAS	2016	A	11C039P001	11C039P001	1	4	06.01.2016	5
GWAS	2016	A	11C049P006	11C049P006	1	4	06.01.2016	5
GWAS	2016	A	11C050P001	11C050P001	1	4	06.01.2016	1
GWAS	2016	A	11C051P001	11C051P001	1	4	06.01.2016	5
GWAS	2016	A	11C055P004	11C055P004	1	4	06.01.2016	1
GWAS	2016	A	11C057P001	11C057P001	1	4	06.01.2016	1
GWAS	2016	A	11C062P603	11C062P603	1	4	06.01.2016	NA
GWAS	2016	A	11C067P001	11C067P001	1	4	06.01.2016	5
GWAS	2016	A	11C071P601	11C071P601	1	4	06.01.2016	3.5
GWAS	2016	A	11C080P002	11C080P002	1	4	06.01.2016	4
GWAS	2016	A	11C103P001	11C103P001	1	4	06.01.2016	2
GWAS	2016	A	11C103P003	11C103P003	1	4	06.01.2016	5
GWAS	2016	A	11C103P005	11C103P005	1	4	06.01.2016	1
GWAS	2016	A	11C105P001	11C105P001	1	4	06.01.2016	5
GWAS	2016	A	11C107P005	11C107P005	1	4	06.01.2016	3
GWAS	2016	A	11C109P002	11C109P002	1	4	06.01.2016	5
GWAS	2016	A	11C109P003	11C109P003	1	4	06.01.2016	2
GWAS	2016	A	11C110P003	11C110P003	1	4	06.01.2016	2.5
GWAS	2016	A	11C113P006	11C113P006	1	4	06.01.2016	2.5
GWAS	2016	A	11C115P003	11C115P003	1	4	06.01.2016	4
GWAS	2016	A	11C116P001	11C116P001	1	4	06.01.2016	2.5
GWAS	2016	A	11C129P002	11C129P002	1	4	06.01.2016	NA
GWAS	2016	A	11C141P001	11C141P001	1	4	06.01.2016	1
GWAS	2016	A	11C145P001	11C145P001	1	4	06.01.2016	1
GWAS	2016	A	11C151P003	11C151P003	1	4	06.01.2016	4
GWAS	2016	A	11C151P008	11C151P008	1	4	06.01.2016	5
GWAS	2016	A	11C153P002	11C153P002	1	4	06.01.2016	1
GWAS	2016	A	11C153P003	11C153P003	1	4	06.01.2016	2
GWAS	2016	A	11C154P005	11C154P005	1	4	06.01.2016	2
GWAS	2016	A	11C157P001	11C157P001	1	4	06.01.2016	1
GWAS	2016	A	11C158P001	11C158P001	1	4	06.01.2016	5
GWAS	2016	A	11C167P004	11C167P004	1	4	06.01.2016	2
GWAS	2016	A	11C179P003	11C179P003	1	4	06.01.2016	1
GWAS	2016	A	11C180P001	11C180P001	1	4	06.01.2016	5
GWAS	2016	A	11C181P002	11C181P002	1	4	06.01.2016	2.5
GWAS	2016	A	11C190P003	11C190P003	1	4	06.01.2016	5
GWAS	2016	A	11C195P003	11C195P003	1	4	06.01.2016	1
GWAS	2016	A	12C001P605	12C001P605	1	4	06.01.2016	3
GWAS	2016	A	12C001P614	12C001P614	1	4	06.01.2016	1
GWAS	2016	A	12C002P006	12C002P006	1	4	06.01.2016	5
GWAS	2016	A	12C002P605	12C002P605	1	4	06.01.2016	2
GWAS	2016	A	12C003P610	12C003P610	1	4	06.01.2016	5
GWAS	2016	A	12C004P001	12C004P001	1	4	06.01.2016	5
GWAS	2016	A	12C004P602	12C004P602	1	4	06.01.2016	1
GWAS	2016	A	12C005P001	12C005P001	1	4	06.01.2016	1
GWAS	2016	A	12C006P001	12C006P001	1	4	06.01.2016	1
GWAS	2016	A	12C006P601	12C006P601	1	4	06.01.2016	1
GWAS	2016	A	12C007P004	12C007P004	1	4	06.01.2016	3
GWAS	2016	A	12C007P601	12C007P601	1	4	06.01.2016	2
GWAS	2016	A	12C008P002	12C008P002	1	4	06.01.2016	1
GWAS	2016	A	12C008P607	12C008P607	1	4	06.01.2016	5
GWAS	2016	A	12C009P002	12C009P002	1	4	06.01.2016	3.5
GWAS	2016	A	12C009P605	12C009P605	1	4	06.01.2016	1
GWAS	2016	A	12C010P603	12C010P603	1	4	06.01.2016	1
GWAS	2016	A	12C011P003	12C011P003	1	4	06.01.2016	5
GWAS	2016	A	12C012P001	12C012P001	1	4	06.01.2016	1
GWAS	2016	A	12C013P001	12C013P001	1	4	06.01.2016	1
GWAS	2016	A	12C013P601	12C013P601	1	4	06.01.2016	4
GWAS	2016	A	12C014P001	12C014P001	1	4	06.01.2016	1
GWAS	2016	A	12C017P601	12C017P601	1	4	06.01.2016	5
GWAS	2016	A	12C018P001	12C018P001	1	4	06.01.2016	5
GWAS	2016	A	12C018P601	12C018P601	1	4	06.01.2016	5
GWAS	2016	A	12C020P001	12C020P001	1	4	06.01.2016	1
GWAS	2016	A	12C021P001	12C021P001	1	4	06.01.2016	1
GWAS	2016	A	12C021P601	12C021P601	1	4	06.01.2016	1.5
GWAS	2016	A	12C022P602	12C022P602	1	4	06.01.2016	3
GWAS	2016	A	12C023P604	12C023P604	1	4	06.01.2016	1
GWAS	2016	A	12C023P605	12C023P605	1	4	06.01.2016	1
GWAS	2016	A	12C024P609	12C024P609	1	4	06.01.2016	1
GWAS	2016	A	12C024P614	12C024P614	1	4	06.01.2016	1
GWAS	2016	A	12C025P604	12C025P604	1	4	06.01.2016	1
GWAS	2016	A	12C026P604	12C026P604	1	4	06.01.2016	5
GWAS	2016	A	12C028P001	12C028P001	1	4	06.01.2016	1
GWAS	2016	A	12C028P601	12C028P601	1	4	06.01.2016	1
GWAS	2016	A	12C029P001	12C029P001	1	4	06.01.2016	2.5
GWAS	2016	A	12C029P601	12C029P601	1	4	06.01.2016	2
GWAS	2016	A	12C030P601	12C030P601	1	4	06.01.2016	3
GWAS	2016	A	12C031P003	12C031P003	1	4	06.01.2016	1
GWAS	2016	A	12C032P001	12C032P001	1	4	06.01.2016	5
GWAS	2016	A	12C032P603	12C032P603	1	4	06.01.2016	3
GWAS	2016	A	12C034P001	12C034P001	1	4	06.01.2016	2
GWAS	2016	A	12C034P601	12C034P601	1	4	06.01.2016	4.5
GWAS	2016	A	12C035P001	12C035P001	1	4	06.01.2016	1.5
GWAS	2016	A	12C035P601	12C035P601	1	4	06.01.2016	2
GWAS	2016	A	12C036P001	12C036P001	1	4	06.01.2016	5
GWAS	2016	A	12C036P601	12C036P601	1	4	06.01.2016	2.5
GWAS	2016	A	12C037P001	12C037P001	1	4	06.01.2016	1
GWAS	2016	A	12C037P602	12C037P602	1	4	06.01.2016	1
GWAS	2016	A	12C038P001	12C038P001	1	4	06.01.2016	NA
GWAS	2016	A	12C038P602	12C038P602	1	4	06.01.2016	1
GWAS	2016	A	12C039P601	12C039P601	1	4	06.01.2016	1
GWAS	2016	A	12C040P002	12C040P002	1	4	06.01.2016	1
GWAS	2016	A	12C041P001	12C041P001	1	4	06.01.2016	1
GWAS	2016	A	12C041P601	12C041P601	1	4	06.01.2016	2.5
GWAS	2016	A	12C042P602	12C042P602	1	4	06.01.2016	5
GWAS	2016	A	12C043P003	12C043P003	1	4	06.01.2016	4.5
GWAS	2016	A	12C044P002	12C044P002	1	4	06.01.2016	2.5
GWAS	2016	A	12C046P001	12C046P001	1	4	06.01.2016	5
GWAS	2016	A	12C047P601	12C047P601	1	4	06.01.2016	2.5
GWAS	2016	A	12C048P002	12C048P002	1	4	06.01.2016	1
GWAS	2016	A	12C048P603	12C048P603	1	4	06.01.2016	1
GWAS	2016	A	12C049P001	12C049P001	1	4	06.01.2016	2
GWAS	2016	A	12C049P601	12C049P601	1	4	06.01.2016	5
GWAS	2016	A	12C050P002	12C050P002	1	4	06.01.2016	4
GWAS	2016	A	12C050P603	12C050P603	1	4	06.01.2016	2.5
GWAS	2016	A	12C052P002	12C052P002	1	4	06.01.2016	4
GWAS	2016	A	12C052P601	12C052P601	1	4	06.01.2016	2
GWAS	2016	A	12C053P601	12C053P601	1	4	06.01.2016	2
GWAS	2016	A	12C054P601	12C054P601	1	4	06.01.2016	5
GWAS	2016	A	12C055P001	12C055P001	1	4	06.01.2016	1
GWAS	2016	A	12C055P601	12C055P601	1	4	06.01.2016	4
GWAS	2016	A	12C056P002	12C056P002	1	4	06.01.2016	5
GWAS	2016	A	12C056P601	12C056P601	1	4	06.01.2016	2.5
GWAS	2016	A	12C058P601	12C058P601	1	4	06.01.2016	1
GWAS	2016	A	12C059P602	12C059P602	1	4	06.01.2016	1
GWAS	2016	A	12C060P602	12C060P602	1	4	06.01.2016	1
GWAS	2016	A	12C061P605	12C061P605	1	4	06.01.2016	4
GWAS	2016	A	12C063P602	12C063P602	1	4	06.01.2016	3.5
GWAS	2016	A	12C064P001	12C064P001	1	4	06.01.2016	1
GWAS	2016	A	12C065P001	12C065P001	1	4	06.01.2016	5
GWAS	2016	A	12C065P602	12C065P602	1	4	06.01.2016	3
GWAS	2016	A	12C066P001	12C066P001	1	4	06.01.2016	2
GWAS	2016	A	12C066P606	12C066P606	1	4	06.01.2016	3.5
GWAS	2016	A	12C067P001	12C067P001	1	4	06.01.2016	5
GWAS	2016	A	12C067P601	12C067P601	1	4	06.01.2016	4
GWAS	2016	A	12C068P002	12C068P002	1	4	06.01.2016	5
GWAS	2016	A	12C068P601	12C068P601	1	4	06.01.2016	2.5
GWAS	2016	A	12C069P002	12C069P002	1	4	06.01.2016	3
GWAS	2016	A	12C069P607	12C069P607	1	4	06.01.2016	2
GWAS	2016	A	12C070P001	12C070P001	1	4	06.01.2016	1
GWAS	2016	A	12C070P004	12C070P004	1	4	06.01.2016	4
GWAS	2016	A	12C070P602	12C070P602	1	4	06.01.2016	1
GWAS	2016	A	12C071P001	12C071P001	1	4	06.01.2016	1
GWAS	2016	A	12C071P602	12C071P602	1	4	06.01.2016	5
GWAS	2016	A	12C072P001	12C072P001	1	4	06.01.2016	1
GWAS	2016	A	12C072P606	12C072P606	1	4	06.01.2016	1
GWAS	2016	A	12C073P001	12C073P001	1	4	06.01.2016	5
GWAS	2016	A	12C073P602	12C073P602	1	4	06.01.2016	3.5
GWAS	2016	A	12C074P601	12C074P601	1	4	06.01.2016	5
GWAS	2016	A	12C075P001	12C075P001	1	4	06.01.2016	1
GWAS	2016	A	12C075P601	12C075P601	1	4	06.01.2016	5
GWAS	2016	A	12C076P001	12C076P001	1	4	06.01.2016	2.5
GWAS	2016	A	12C077P601	12C077P601	1	4	06.01.2016	5
GWAS	2016	A	12C078P602	12C078P602	1	4	06.01.2016	1
GWAS	2016	A	12C079P001	12C079P001	1	4	06.01.2016	5
GWAS	2016	A	12C080P002	12C080P002	1	4	06.01.2016	2.5
GWAS	2016	A	12C081P001	12C081P001	1	4	06.01.2016	5
GWAS	2016	A	12C082P001	12C082P001	1	4	06.01.2016	3
GWAS	2016	A	12C082P602	12C082P602	1	4	06.01.2016	2
GWAS	2016	A	12C083P003	12C083P003	1	4	06.01.2016	2.5
GWAS	2016	A	12C083P602	12C083P602	1	4	06.01.2016	2
GWAS	2016	A	12C084P002	12C084P002	1	4	06.01.2016	2.5
GWAS	2016	A	12C084P606	12C084P606	1	4	06.01.2016	1
GWAS	2016	A	12C085P001	12C085P001	1	4	06.01.2016	2.5
GWAS	2016	A	12C085P601	12C085P601	1	4	06.01.2016	5
GWAS	2016	A	12C087P602	12C087P602	1	4	06.01.2016	2.5
GWAS	2016	A	12C088P001	12C088P001	1	4	06.01.2016	2.5
GWAS	2016	A	12C088P804	12C088P804	1	4	06.01.2016	1
GWAS	2016	A	12C089P002	12C089P002	1	4	06.01.2016	2
GWAS	2016	A	12C089P602	12C089P602	1	4	06.01.2016	5
GWAS	2016	A	12C090P603	12C090P603	1	4	06.01.2016	5
GWAS	2016	A	12C091P001	12C091P001	1	4	06.01.2016	5
GWAS	2016	A	12C091P601	12C091P601	1	4	06.01.2016	3
GWAS	2016	A	12C092P602	12C092P602	1	4	06.01.2016	4.5
GWAS	2016	A	12C093P604	12C093P604	1	4	06.01.2016	5
GWAS	2016	A	12C094P604	12C094P604	1	4	06.01.2016	2
GWAS	2016	A	12C095P002	12C095P002	1	4	06.01.2016	1
GWAS	2016	A	12C095P602	12C095P602	1	4	06.01.2016	5
GWAS	2016	A	12C096P002	12C096P002	1	4	06.01.2016	5
GWAS	2016	A	12C096P602	12C096P602	1	4	06.01.2016	2.5
GWAS	2016	A	12C097P003	12C097P003	1	4	06.01.2016	5
GWAS	2016	A	12C097P602	12C097P602	1	4	06.01.2016	5
GWAS	2016	A	12C097P605	12C097P605	1	4	06.01.2016	2.5
GWAS	2016	A	12C098P001	12C098P001	1	4	06.01.2016	2.5
GWAS	2016	A	12C099P003	12C099P003	1	4	06.01.2016	1
GWAS	2016	A	12C100P002	12C100P002	1	4	06.01.2016	1
GWAS	2016	A	12C104P001	12C104P001	1	4	06.01.2016	2
GWAS	2016	A	12C104P004	12C104P004	1	4	06.01.2016	NA
GWAS	2016	A	12C104P005	12C104P005	1	4	06.01.2016	2.5
GWAS	2016	A	12C104P006	12C104P006	1	4	06.01.2016	3
GWAS	2016	A	12C104P007	12C104P007	1	4	06.01.2016	2
GWAS	2016	A	12C105P002	12C105P002	1	4	06.01.2016	5
GWAS	2016	A	12C105P004	12C105P004	1	4	06.01.2016	5
GWAS	2016	A	12C105P010	12C105P010	1	4	06.01.2016	3
GWAS	2016	A	12C106P006	12C106P006	1	4	06.01.2016	1
GWAS	2016	A	12C107P001	12C107P001	1	4	06.01.2016	2.5
GWAS	2016	A	12C108P003	12C108P003	1	4	06.01.2016	3
GWAS	2016	A	12C108P004	12C108P004	1	4	06.01.2016	4
GWAS	2016	A	12C109P002	12C109P002	1	4	06.01.2016	2.5
GWAS	2016	A	12C110P002	12C110P002	1	4	06.01.2016	1
GWAS	2016	A	12C110P004	12C110P004	1	4	06.01.2016	1.5
GWAS	2016	A	12C111P001	12C111P001	1	4	06.01.2016	2.5
GWAS	2016	A	12C111P002	12C111P002	1	4	06.01.2016	5
GWAS	2016	A	12C112P004	12C112P004	1	4	06.01.2016	5
GWAS	2016	A	12C112P007	12C112P007	1	4	06.01.2016	4
GWAS	2016	A	12C112P008	12C112P008	1	4	06.01.2016	2.5
GWAS	2016	A	12C113P002	12C113P002	1	4	06.01.2016	2.5
GWAS	2016	A	12C114P001	12C114P001	1	4	06.01.2016	2
GWAS	2016	A	12C115P005	12C115P005	1	4	06.01.2016	1
GWAS	2016	A	12C115P006	12C115P006	1	4	06.01.2016	1
GWAS	2016	A	12C116P001	12C116P001	1	4	06.01.2016	3
GWAS	2016	A	12C117P001	12C117P001	1	4	06.01.2016	5
GWAS	2016	A	12C118P001	12C118P001	1	4	06.01.2016	2.5
GWAS	2016	A	12C118P002	12C118P002	1	4	06.01.2016	1.5
GWAS	2016	A	12C122P001	12C122P001	1	4	06.01.2016	2
GWAS	2016	A	12C124P001	12C124P001	1	4	06.01.2016	1.5
GWAS	2016	A	12C125P003	12C125P003	1	4	06.01.2016	NA
GWAS	2016	A	12C128P002	12C128P002	1	4	06.01.2016	2
GWAS	2016	A	12C129P002	12C129P002	1	4	06.01.2016	2
GWAS	2016	A	12C130P002	12C130P002	1	4	06.01.2016	3
GWAS	2016	A	12C131P001	12C131P001	1	4	06.01.2016	3
GWAS	2016	A	12C132P005	12C132P005	1	4	06.01.2016	5
GWAS	2016	A	12C137P002	12C137P002	1	4	06.01.2016	5
GWAS	2016	A	12C138P001	12C138P001	1	4	06.01.2016	NA
GWAS	2016	A	12C140P001	12C140P001	1	4	06.01.2016	5
GWAS	2016	A	12C142P001	12C142P001	1	4	06.01.2016	1
GWAS	2016	A	12C143P001	12C143P001	1	4	06.01.2016	1
GWAS	2016	A	12C145P001	12C145P001	1	4	06.01.2016	4
GWAS	2016	A	12C146P001	12C146P001	1	4	06.01.2016	1
GWAS	2016	A	12C147P002	12C147P002	1	4	06.01.2016	2
GWAS	2016	A	12C148P005	12C148P005	1	4	06.01.2016	1
GWAS	2016	A	12C149P002	12C149P002	1	4	06.01.2016	1
GWAS	2016	A	12C151P001	12C151P001	1	4	06.01.2016	5
GWAS	2016	A	12C152P002	12C152P002	1	4	06.01.2016	1
GWAS	2016	A	12C155P001	12C155P001	1	4	06.01.2016	1
GWAS	2016	A	12C159P001	12C159P001	1	4	06.01.2016	5
GWAS	2016	A	12C160P002	12C160P002	1	4	06.01.2016	1
GWAS	2016	A	12C160P003	12C160P003	1	4	06.01.2016	5
GWAS	2016	A	12C161P003	12C161P003	1	4	06.01.2016	3
GWAS	2016	A	12C162P001	12C162P001	1	4	06.01.2016	5
GWAS	2016	A	12C162P003	12C162P003	1	4	06.01.2016	3
GWAS	2016	A	12C166P002	12C166P002	1	4	06.01.2016	5
GWAS	2016	A	12C167P002	12C167P002	1	4	06.01.2016	2
GWAS	2016	A	12C169P003	12C169P003	1	4	06.01.2016	5
GWAS	2016	A	12C169P004	12C169P004	1	4	06.01.2016	2
GWAS	2016	A	12C170P001	12C170P001	1	4	06.01.2016	5
GWAS	2016	A	12C171P005	12C171P005	1	4	06.01.2016	5
GWAS	2016	A	12C172P002	12C172P002	1	4	06.01.2016	5
GWAS	2016	A	12C175P001	12C175P001	1	4	06.01.2016	5
GWAS	2016	A	12C176P001	12C176P001	1	4	06.01.2016	3
GWAS	2016	A	12C177P001	12C177P001	1	4	06.01.2016	3
GWAS	2016	A	12C178P004	12C178P004	1	4	06.01.2016	2.5
GWAS	2016	A	12C178P005	12C178P005	1	4	06.01.2016	2.5
GWAS	2016	A	12C179P001	12C179P001	1	4	06.01.2016	2
GWAS	2016	A	12C180P004	12C180P004	1	4	06.01.2016	5
GWAS	2016	A	12C181P001	12C181P001	1	4	06.01.2016	3
GWAS	2016	A	12C182P005	12C182P005	1	4	06.01.2016	2.5
GWAS	2016	A	12C183P001	12C183P001	1	4	06.01.2016	1
GWAS	2016	A	12C184P001	12C184P001	1	4	06.01.2016	5
GWAS	2016	A	12C185P001	12C185P001	1	4	06.01.2016	2
GWAS	2016	A	12C186P001	12C186P001	1	4	06.01.2016	1
GWAS	2016	A	12C189P001	12C189P001	1	4	06.01.2016	1
GWAS	2016	A	12C190P003	12C190P003	1	4	06.01.2016	4
GWAS	2016	A	12C191P001	12C191P001	1	4	06.01.2016	1
GWAS	2016	A	12C192P001	12C192P001	1	4	06.01.2016	5
GWAS	2016	A	12C193P001	12C193P001	1	4	06.01.2016	1
GWAS	2016	A	12C194P001	12C194P001	1	4	06.01.2016	2
GWAS	2016	A	37C020P045	37C020P045	1	4	06.01.2016	NA
GWAS	2016	A	39C082P019	39C082P019	1	4	06.01.2016	1
GWAS	2016	A	51S001P001	51S001P001	1	4	06.01.2016	1.5
GWAS	2016	A	55C023P001	55C023P001	1	4	06.01.2016	2
GWAS	2016	A	59C039P001	59C039P001	1	4	06.01.2016	2
GWAS	2016	A	61S016P099	61S016P099	1	4	06.01.2016	2
GWAS	2016	A	61S018P045	61S018P045	1	4	06.01.2016	1
GWAS	2016	A	61S016P006	61S016P006	1	4	06.01.2016	1
GWAS	2016	A	65C065P601	65C065P601	1	4	06.01.2016	1
GWAS	2016	A	69C072P102	69C072P102	1	4	06.01.2016	1
GWAS	2016	A	70C003P117	70C003P117	1	4	06.01.2016	2.5
GWAS	2016	A	70C027P103	70C027P103	1	4	06.01.2016	2
GWAS	2016	A	70C030P101	70C030P101	1	4	06.01.2016	1
GWAS	2016	A	71C098P605	71C098P605	1	4	06.01.2016	2
GWAS	2016	A	72C361P105	72C361P105	1	4	06.01.2016	2
GWAS	2016	A	75C121P101	75C121P101	1	4	06.01.2016	2
GWAS	2016	A	81C016P604	81C016P604	1	4	06.01.2016	2.5
GWAS	2016	A	83C076P001	83C076P001	1	4	06.01.2016	1
GWAS	2016	A	85C093P003	85C093P003	1	4	06.01.2016	2
GWAS	2016	A	86C065P202	86C065P202	1	4	06.01.2016	5
GWAS	2016	A	86C169P001	86C169P001	1	4	06.01.2016	5
GWAS	2016	A	88C031P003	88C031P003	1	4	06.01.2016	1
GWAS	2016	A	88C118P603	88C118P603	1	4	06.01.2016	5
GWAS	2016	A	88C270P001	88C270P001	1	4	06.01.2016	4
GWAS	2016	A	89C029P623	89C029P623	1	4	06.01.2016	4
GWAS	2016	A	89C206P002	89C206P002	1	4	06.01.2016	1
GWAS	2016	A	89C208P012	89C208P012	1	4	06.01.2016	1
GWAS	2016	A	89C230P007	89C230P007	1	4	06.01.2016	2.5
GWAS	2016	A	90C253P003	90C253P003	1	4	06.01.2016	5
GWAS	2016	A	91C326P001	91C326P001	1	4	06.01.2016	5
GWAS	2016	A	91C326P003	91C326P003	1	4	06.01.2016	5
GWAS	2016	A	92C063P002	92C063P002	1	4	06.01.2016	5
GWAS	2016	A	92C245P002	92C245P002	1	4	06.01.2016	1
GWAS	2016	A	93C060P002	93C060P002	1	4	06.01.2016	5
GWAS	2016	A	94C016P001	94C016P001	1	4	06.01.2016	3
GWAS	2016	A	95C179P002	95C179P002	1	4	06.01.2016	1
GWAS	2016	A	95C197P001	95C197P001	1	4	06.01.2016	1
GWAS	2016	A	95C197P003	95C197P003	1	4	06.01.2016	1
GWAS	2016	A	97C079P014	97C079P014	1	4	06.01.2016	5
GWAS	2016	A	97C085P006	97C085P006	1	4	06.01.2016	1
GWAS	2016	A	97C086P001	97C086P001	1	4	06.01.2016	1
GWAS	2016	A	97C111P005	97C111P005	1	4	06.01.2016	5
GWAS	2016	A	97C156P002	97C156P002	1	4	06.01.2016	3
GWAS	2016	A	97C192P001	97C192P001	1	4	06.01.2016	1
GWAS	2016	A	97C209P001	97C209P001	1	4	06.01.2016	1
GWAS	2016	A	98C152P008	98C152P008	1	4	06.01.2016	1
GWAS	2016	A	98C153P003	98C153P003	1	4	06.01.2016	2
GWAS	2016	A	99C088P007	99C088P007	1	4	06.01.2016	5
GWAS	2016	A	63C125P039	Aiko	1	4	06.01.2016	2
GWAS	2016	A	97C117P003	Albion	1	4	06.01.2016	NA
GWAS	2016	A	97C117P003	Albion	1	4	06.01.2016	5
GWAS	2016	A	97C117P003	Albion	1	4	06.01.2016	5
GWAS	2016	A	97C117P003	Albion	1	4	06.01.2016	2.5
GWAS	2016	A	97C117P003	Albion	1	4	06.01.2016	2.5
GWAS	2016	A	97C117P003	Albion	1	4	06.01.2016	2
GWAS	2016	A	56S115P011	Aliso	1	4	06.01.2016	3
GWAS	2016	A	88C066P610	Anaheim	1	4	06.01.2016	2.5
GWAS	2016	A	91C248P003	Aromas	1	4	06.01.2016	2
GWAS	2016	A	04C039P001	Benicia	1	4	06.01.2016	4.5
GWAS	2016	A	72C271P105	Brighton	1	4	06.01.2016	2
GWAS	2016	A	65CA1501	CA_1501	1	4	06.01.2016	5
GWAS	2016	A	08C181P001	Cabrillo	1	4	06.01.2016	5
GWAS	2016	A	88C029P603	Camarosa	1	4	06.01.2016	3
GWAS	2016	A	94C003P011	Camino_Real	1	4	06.01.2016	3
GWAS	2016	A	83C093P006	Capitola	1	4	06.01.2016	2
GWAS	2016	A	88C070P613	Carlsbad	1	4	06.01.2016	4
GWAS	2016	A	77C032P103	Chandler	1	4	06.01.2016	3.5
GWAS	2016	A	65C272P104	Cruz	1	4	06.01.2016	1
GWAS	2016	A	91C248P006	Diamante	1	4	06.01.2016	1
GWAS	2016	A	36C039P004	Donner	1	4	06.01.2016	NA
GWAS	2016	A	70C003P108	Douglas	1	4	06.01.2016	2.5
GWAS	2016	A	PI551394	Earliglow	1	4	06.01.2016	1
GWAS	2016	A	53C009P010	Fresno	1	4	06.01.2016	1
GWAS	2016	A	08C132P608	Fronteras	1	4	06.01.2016	NA
GWAS	2016	A	08C132P608	Fronteras	1	4	06.01.2016	1
GWAS	2016	A	08C132P608	Fronteras	1	4	06.01.2016	1
GWAS	2016	A	08C132P608	Fronteras	1	4	06.01.2016	1
GWAS	2016	A	08C132P608	Fronteras	1	4	06.01.2016	1
GWAS	2016	A	08C132P608	Fronteras	1	4	06.01.2016	1
GWAS	2016	A	91C248P002	Gaviota	1	4	06.01.2016	2
GWAS	2016	A	08C055P002	Grenada	1	4	06.01.2016	5
GWAS	2016	A	PI551407	Guardian	1	4	06.01.2016	1
GWAS	2016	A	69C141P101	Hecker	1	4	06.01.2016	2.5
GWAS	2016	A	82C014P603	Irvine	1	4	06.01.2016	3
GWAS	2016	A	88C066P616	Laguna	1	4	06.01.2016	3.5
GWAS	2016	A	36C003P001	Lassen	1	4	06.01.2016	5
GWAS	2016	A	07C132P003	Merced	1	4	06.01.2016	2
GWAS	2016	A	04C044P603	Mojave	1	4	06.01.2016	5
GWAS	2016	A	01C132P003	Monterey	1	4	06.01.2016	NA
GWAS	2016	A	75C071P105	Muir	1	4	06.01.2016	2
GWAS	2016	A	81C043P603	Oso_Grande	1	4	06.01.2016	1
GWAS	2016	A	91C324P001	Pacific	1	4	06.01.2016	4.5
GWAS	2016	A	71C101P611	Pajaro	1	4	06.01.2016	5
GWAS	2016	A	00C259P002	Palomar	1	4	06.01.2016	2.5
GWAS	2016	A	77C030P605	Parker	1	4	06.01.2016	3
GWAS	2016	A	08C020P602	Petaluma	1	4	06.01.2016	5
GWAS	2016	A	01C206P005	Portola	1	4	06.01.2016	2
GWAS	2016	A	01C139P002	San_Andreas	1	4	06.01.2016	1
GWAS	2016	A	83C049P001	Seascape	1	4	06.01.2016	2
GWAS	2016	A	75C071P107	Selva	1	4	06.01.2016	3
GWAS	2016	A	56C124P012	Sequoia	1	4	06.01.2016	2
GWAS	2016	A	35C035P008	Shasta	1	4	06.01.2016	1
GWAS	2016	A	35C093P011	Solana	1	4	06.01.2016	1
GWAS	2016	A	72C330P107	Soquel	1	4	06.01.2016	1
GWAS	2016	A	53C009P002	Tioga	1	4	06.01.2016	1
GWAS	2016	A	63C120P001	Tufts	1	4	06.01.2016	1
GWAS	2016	A	96C042P601	Ventana	1	4	06.01.2016	1
GWAS	2016	A	52C016P007	Wiltguard	1	4	06.01.2016	1.5
GWAS	2016	B	00C003P602	00C003P602	1	4	06.01.2016	1.5
GWAS	2016	B	00C018P601	00C018P601	1	4	06.01.2016	5
GWAS	2016	B	00C027P601	00C027P601	1	4	06.01.2016	5
GWAS	2016	B	00C038P606	00C038P606	1	4	06.01.2016	1
GWAS	2016	B	00C046P601	00C046P601	1	4	06.01.2016	2.5
GWAS	2016	B	00C057P613	00C057P613	1	4	06.01.2016	1
GWAS	2016	B	00C139P003	00C139P003	1	4	06.01.2016	5
GWAS	2016	B	01C053P602	01C053P602	1	4	06.01.2016	1
GWAS	2016	B	01C057P601	01C057P601	1	4	06.01.2016	1.5
GWAS	2016	B	01C080P602	01C080P602	1	4	06.01.2016	1
GWAS	2016	B	01C111P004	01C111P004	1	4	06.01.2016	2
GWAS	2016	B	01C134P001	01C134P001	1	4	06.01.2016	5
GWAS	2016	B	01C134P003	01C134P003	1	4	06.01.2016	4
GWAS	2016	B	01C136P001	01C136P001	1	4	06.01.2016	1
GWAS	2016	B	01C138P001	01C138P001	1	4	06.01.2016	4
GWAS	2016	B	01C141P002	01C141P002	1	4	06.01.2016	1
GWAS	2016	B	01C158P001	01C158P001	1	4	06.01.2016	1
GWAS	2016	B	01C203P006	01C203P006	1	4	06.01.2016	5
GWAS	2016	B	02C068P608	02C068P608	1	4	06.01.2016	5
GWAS	2016	B	02C093P006	02C093P006	1	4	06.01.2016	3
GWAS	2016	B	02C095P004	02C095P004	1	4	06.01.2016	4
GWAS	2016	B	02C103P002	02C103P002	1	4	06.01.2016	1
GWAS	2016	B	02C132P006	02C132P006	1	4	06.01.2016	2.5
GWAS	2016	B	02C134P003	02C134P003	1	4	06.01.2016	NA
GWAS	2016	B	02C143P003	02C143P003	1	4	06.01.2016	2.5
GWAS	2016	B	02C144P003	02C144P003	1	4	06.01.2016	2.5
GWAS	2016	B	02C156P003	02C156P003	1	4	06.01.2016	2.5
GWAS	2016	B	02C229P001	02C229P001	1	4	06.01.2016	5
GWAS	2016	B	02C230P001	02C230P001	1	4	06.01.2016	1
GWAS	2016	B	03C001P606	03C001P606	1	4	06.01.2016	1
GWAS	2016	B	03C065P601	03C065P601	1	4	06.01.2016	1
GWAS	2016	B	03C075P601	03C075P601	1	4	06.01.2016	4
GWAS	2016	B	03C092P008	03C092P008	1	4	06.01.2016	1
GWAS	2016	B	03C102P002	03C102P002	1	4	06.01.2016	1
GWAS	2016	B	03C111P005	03C111P005	1	4	06.01.2016	2.5
GWAS	2016	B	03C114P003	03C114P003	1	4	06.01.2016	2.5
GWAS	2016	B	03C132P003	03C132P003	1	4	06.01.2016	2.5
GWAS	2016	B	03C149P008	03C149P008	1	4	06.01.2016	4
GWAS	2016	B	04C001P601	04C001P601	1	4	06.01.2016	5
GWAS	2016	B	04C009P005	04C009P005	1	4	06.01.2016	2.5
GWAS	2016	B	04C013P604	04C013P604	1	4	06.01.2016	2
GWAS	2016	B	04C018P004	04C018P004	1	4	06.01.2016	1
GWAS	2016	B	04C020P604	04C020P604	1	4	06.01.2016	3
GWAS	2016	B	04C038P603	04C038P603	1	4	06.01.2016	1
GWAS	2016	B	04C041P006	04C041P006	1	4	06.01.2016	1.5
GWAS	2016	B	04C041P007	04C041P007	1	4	06.01.2016	1
GWAS	2016	B	04C045P605	04C045P605	1	4	06.01.2016	5
GWAS	2016	B	04C053P001	04C053P001	1	4	06.01.2016	2.5
GWAS	2016	B	04C056P608	04C056P608	1	4	06.01.2016	5
GWAS	2016	B	04C073P002	04C073P002	1	4	06.01.2016	4.5
GWAS	2016	B	04C076P004	04C076P004	1	4	06.01.2016	1
GWAS	2016	B	04C077P002	04C077P002	1	4	06.01.2016	1
GWAS	2016	B	04C085P601	04C085P601	1	4	06.01.2016	1
GWAS	2016	B	05C027P605	05C027P605	1	4	06.01.2016	5
GWAS	2016	B	05C054P611	05C054P611	1	4	06.01.2016	2.5
GWAS	2016	B	05C065P608	05C065P608	1	4	06.01.2016	1
GWAS	2016	B	05C092P011	05C092P011	1	4	06.01.2016	5
GWAS	2016	B	05C095P004	05C095P004	1	4	06.01.2016	3.5
GWAS	2016	B	05C097P007	05C097P007	1	4	06.01.2016	3.5
GWAS	2016	B	05C099P006	05C099P006	1	4	06.01.2016	2
GWAS	2016	B	05C106P002	05C106P002	1	4	06.01.2016	4.5
GWAS	2016	B	05C107P002	05C107P002	1	4	06.01.2016	3
GWAS	2016	B	05C108P007	05C108P007	1	4	06.01.2016	5
GWAS	2016	B	05C109P002	05C109P002	1	4	06.01.2016	2
GWAS	2016	B	05C115P005	05C115P005	1	4	06.01.2016	1
GWAS	2016	B	05C117P005	05C117P005	1	4	06.01.2016	1
GWAS	2016	B	05C120P009	05C120P009	1	4	06.01.2016	2.5
GWAS	2016	B	05C132P001	05C132P001	1	4	06.01.2016	5
GWAS	2016	B	05C144P003	05C144P003	1	4	06.01.2016	1
GWAS	2016	B	05C148P002	05C148P002	1	4	06.01.2016	1
GWAS	2016	B	05C154P002	05C154P002	1	4	06.01.2016	1
GWAS	2016	B	05C165P001	05C165P001	1	4	06.01.2016	5
GWAS	2016	B	05C172P002	05C172P002	1	4	06.01.2016	5
GWAS	2016	B	05C194P001	05C194P001	1	4	06.01.2016	5
GWAS	2016	B	05C197P002	05C197P002	1	4	06.01.2016	2.5
GWAS	2016	B	05C199P010	05C199P010	1	4	06.01.2016	5
GWAS	2016	B	05C205P002	05C205P002	1	4	06.01.2016	2
GWAS	2016	B	05C206P005	05C206P005	1	4	06.01.2016	5
GWAS	2016	B	06C016P602	06C016P602	1	4	06.01.2016	2.5
GWAS	2016	B	06C020P605	06C020P605	1	4	06.01.2016	1
GWAS	2016	B	06C043P603	06C043P603	1	4	06.01.2016	2.5
GWAS	2016	B	06C050P611	06C050P611	1	4	06.01.2016	3
GWAS	2016	B	06C051P609	06C051P609	1	4	06.01.2016	2
GWAS	2016	B	06C066P603	06C066P603	1	4	06.01.2016	2.5
GWAS	2016	B	06C090P605	06C090P605	1	4	06.01.2016	2
GWAS	2016	B	06C102P002	06C102P002	1	4	06.01.2016	2.5
GWAS	2016	B	06C106P002	06C106P002	1	4	06.01.2016	5
GWAS	2016	B	06C109P003	06C109P003	1	4	06.01.2016	5
GWAS	2016	B	06C110P004	06C110P004	1	4	06.01.2016	1
GWAS	2016	B	06C111P001	06C111P001	1	4	06.01.2016	2
GWAS	2016	B	06C132P001	06C132P001	1	4	06.01.2016	5
GWAS	2016	B	06C132P002	06C132P002	1	4	06.01.2016	1.5
GWAS	2016	B	06C137P002	06C137P002	1	4	06.01.2016	2.5
GWAS	2016	B	06C202P001	06C202P001	1	4	06.01.2016	4
GWAS	2016	B	06C204P001	06C204P001	1	4	06.01.2016	1
GWAS	2016	B	07C001P608	07C001P608	1	4	06.01.2016	1
GWAS	2016	B	07C009P601	07C009P601	1	4	06.01.2016	3.5
GWAS	2016	B	07C043P001	07C043P001	1	4	06.01.2016	2
GWAS	2016	B	07C049P003	07C049P003	1	4	06.01.2016	1
GWAS	2016	B	07C050P601	07C050P601	1	4	06.01.2016	1
GWAS	2016	B	07C064P002	07C064P002	1	4	06.01.2016	2.5
GWAS	2016	B	07C064P003	07C064P003	1	4	06.01.2016	1
GWAS	2016	B	07C064P005	07C064P005	1	4	06.01.2016	2
GWAS	2016	B	07C067P608	07C067P608	1	4	06.01.2016	3.5
GWAS	2016	B	07C090P606	07C090P606	1	4	06.01.2016	3
GWAS	2016	B	07C092P003	07C092P003	1	4	06.01.2016	1
GWAS	2016	B	07C119P001	07C119P001	1	4	06.01.2016	1
GWAS	2016	B	07C120P003	07C120P003	1	4	06.01.2016	1
GWAS	2016	B	07C134P001	07C134P001	1	4	06.01.2016	1
GWAS	2016	B	07C141P001	07C141P001	1	4	06.01.2016	3
GWAS	2016	B	07C148P001	07C148P001	1	4	06.01.2016	1
GWAS	2016	B	07C148P003	07C148P003	1	4	06.01.2016	1.5
GWAS	2016	B	07C203P001	07C203P001	1	4	06.01.2016	4
GWAS	2016	B	07C216P001	07C216P001	1	4	06.01.2016	1
GWAS	2016	B	08C005P601	08C005P601	1	4	06.01.2016	2.5
GWAS	2016	B	08C013P605	08C013P605	1	4	06.01.2016	3.5
GWAS	2016	B	08C013P606	08C013P606	1	4	06.01.2016	1
GWAS	2016	B	08C017P005	08C017P005	1	4	06.01.2016	5
GWAS	2016	B	08C018P005	08C018P005	1	4	06.01.2016	1.5
GWAS	2016	B	08C037P603	08C037P603	1	4	06.01.2016	1
GWAS	2016	B	08C043P001	08C043P001	1	4	06.01.2016	5
GWAS	2016	B	08C043P004	08C043P004	1	4	06.01.2016	2.5
GWAS	2016	B	08C043P010	08C043P010	1	4	06.01.2016	1
GWAS	2016	B	08C075P001	08C075P001	1	4	06.01.2016	2.5
GWAS	2016	B	08C114P005	08C114P005	1	4	06.01.2016	3.5
GWAS	2016	B	08C123P001	08C123P001	1	4	06.01.2016	5
GWAS	2016	B	08C124P001	08C124P001	1	4	06.01.2016	2.5
GWAS	2016	B	08C128P002	08C128P002	1	4	06.01.2016	1
GWAS	2016	B	08C129P004	08C129P004	1	4	06.01.2016	3
GWAS	2016	B	08C131P003	08C131P003	1	4	06.01.2016	1
GWAS	2016	B	08C132P003	08C132P003	1	4	06.01.2016	2.5
GWAS	2016	B	08C135P004	08C135P004	1	4	06.01.2016	5
GWAS	2016	B	08C137P001	08C137P001	1	4	06.01.2016	5
GWAS	2016	B	08C137P002	08C137P002	1	4	06.01.2016	2
GWAS	2016	B	08C138P003	08C138P003	1	4	06.01.2016	1
GWAS	2016	B	08C150P009	08C150P009	1	4	06.01.2016	5
GWAS	2016	B	08C182P002	08C182P002	1	4	06.01.2016	4
GWAS	2016	B	09C012P605	09C012P605	1	4	06.01.2016	5
GWAS	2016	B	09C016P601	09C016P601	1	4	06.01.2016	1
GWAS	2016	B	09C020P609	09C020P609	1	4	06.01.2016	1
GWAS	2016	B	09C032P605	09C032P605	1	4	06.01.2016	5
GWAS	2016	B	09C037P001	09C037P001	1	4	06.01.2016	4.5
GWAS	2016	B	09C048P003	09C048P003	1	4	06.01.2016	1
GWAS	2016	B	09C056P608	09C056P608	1	4	06.01.2016	4
GWAS	2016	B	09C061P602	09C061P602	1	4	06.01.2016	1
GWAS	2016	B	09C061P606	09C061P606	1	4	06.01.2016	1
GWAS	2016	B	09C062P001	09C062P001	1	4	06.01.2016	1
GWAS	2016	B	09C068P602	09C068P602	1	4	06.01.2016	5
GWAS	2016	B	09C078P603	09C078P603	1	4	06.01.2016	5
GWAS	2016	B	09C085P002	09C085P002	1	4	06.01.2016	1
GWAS	2016	B	09C085P601	09C085P601	1	4	06.01.2016	5
GWAS	2016	B	09C088P602	09C088P602	1	4	06.01.2016	1
GWAS	2016	B	09C091P001	09C091P001	1	4	06.01.2016	1
GWAS	2016	B	09C097P003	09C097P003	1	4	06.01.2016	1
GWAS	2016	B	09C100P003	09C100P003	1	4	06.01.2016	NA
GWAS	2016	B	09C103P002	09C103P002	1	4	06.01.2016	4.5
GWAS	2016	B	09C108P002	09C108P002	1	4	06.01.2016	3
GWAS	2016	B	09C132P003	09C132P003	1	4	06.01.2016	1
GWAS	2016	B	09C141P001	09C141P001	1	4	06.01.2016	1
GWAS	2016	B	09C154P605	09C154P605	1	4	06.01.2016	5
GWAS	2016	B	09C166P007	09C166P007	1	4	06.01.2016	5
GWAS	2016	B	09C171P602	09C171P602	1	4	06.01.2016	5
GWAS	2016	B	09C180P001	09C180P001	1	4	06.01.2016	2
GWAS	2016	B	10C001P604	10C001P604	1	4	06.01.2016	5
GWAS	2016	B	10C005P602	10C005P602	1	4	06.01.2016	1
GWAS	2016	B	10C007P003	10C007P003	1	4	06.01.2016	1
GWAS	2016	B	10C012P003	10C012P003	1	4	06.01.2016	2
GWAS	2016	B	10C015P605	10C015P605	1	4	06.01.2016	1
GWAS	2016	B	10C017P001	10C017P001	1	4	06.01.2016	1
GWAS	2016	B	10C017P002	10C017P002	1	4	06.01.2016	1
GWAS	2016	B	10C023P001	10C023P001	1	4	06.01.2016	5
GWAS	2016	B	10C024P002	10C024P002	1	4	06.01.2016	4
GWAS	2016	B	10C025P601	10C025P601	1	4	06.01.2016	2
GWAS	2016	B	10C030P001	10C030P001	1	4	06.01.2016	5
GWAS	2016	B	10C031P602	10C031P602	1	4	06.01.2016	1
GWAS	2016	B	10C037P604	10C037P604	1	4	06.01.2016	3.5
GWAS	2016	B	10C038P601	10C038P601	1	4	06.01.2016	2
GWAS	2016	B	10C070P611	10C070P611	1	4	06.01.2016	5
GWAS	2016	B	10C077P601	10C077P601	1	4	06.01.2016	5
GWAS	2016	B	10C078P603	10C078P603	1	4	06.01.2016	5
GWAS	2016	B	10C080P605	10C080P605	1	4	06.01.2016	2.5
GWAS	2016	B	10C081P001	10C081P001	1	4	06.01.2016	3
GWAS	2016	B	10C087P002	10C087P002	1	4	06.01.2016	5
GWAS	2016	B	10C099P001	10C099P001	1	4	06.01.2016	4
GWAS	2016	B	10C105P001	10C105P001	1	4	06.01.2016	1.5
GWAS	2016	B	10C106P001	10C106P001	1	4	06.01.2016	1
GWAS	2016	B	10C106P008	10C106P008	1	4	06.01.2016	2.5
GWAS	2016	B	10C116P001	10C116P001	1	4	06.01.2016	2.5
GWAS	2016	B	10C122P003	10C122P003	1	4	06.01.2016	2
GWAS	2016	B	10C122P006	10C122P006	1	4	06.01.2016	1
GWAS	2016	B	10C124P002	10C124P002	1	4	06.01.2016	4
GWAS	2016	B	10C126P003	10C126P003	1	4	06.01.2016	5
GWAS	2016	B	10C127P001	10C127P001	1	4	06.01.2016	3
GWAS	2016	B	10C134P004	10C134P004	1	4	06.01.2016	5
GWAS	2016	B	10C136P004	10C136P004	1	4	06.01.2016	5
GWAS	2016	B	10C137P005	10C137P005	1	4	06.01.2016	5
GWAS	2016	B	10C140P001	10C140P001	1	4	06.01.2016	4.5
GWAS	2016	B	10C141P001	10C141P001	1	4	06.01.2016	2
GWAS	2016	B	10C143P001	10C143P001	1	4	06.01.2016	3
GWAS	2016	B	10C144P001	10C144P001	1	4	06.01.2016	1
GWAS	2016	B	10C144P002	10C144P002	1	4	06.01.2016	1
GWAS	2016	B	10C144P003	10C144P003	1	4	06.01.2016	2
GWAS	2016	B	10C160P001	10C160P001	1	4	06.01.2016	1
GWAS	2016	B	10C160P009	10C160P009	1	4	06.01.2016	5
GWAS	2016	B	10C169P001	10C169P001	1	4	06.01.2016	5
GWAS	2016	B	10C187P004	10C187P004	1	4	06.01.2016	1
GWAS	2016	B	11C021P001	11C021P001	1	4	06.01.2016	2
GWAS	2016	B	11C032P002	11C032P002	1	4	06.01.2016	5
GWAS	2016	B	11C034P605	11C034P605	1	4	06.01.2016	5
GWAS	2016	B	11C036P601	11C036P601	1	4	06.01.2016	5
GWAS	2016	B	11C039P001	11C039P001	1	4	06.01.2016	5
GWAS	2016	B	11C049P006	11C049P006	1	4	06.01.2016	5
GWAS	2016	B	11C050P001	11C050P001	1	4	06.01.2016	1
GWAS	2016	B	11C051P001	11C051P001	1	4	06.01.2016	5
GWAS	2016	B	11C055P004	11C055P004	1	4	06.01.2016	1
GWAS	2016	B	11C057P001	11C057P001	1	4	06.01.2016	1
GWAS	2016	B	11C062P603	11C062P603	1	4	06.01.2016	2.5
GWAS	2016	B	11C067P001	11C067P001	1	4	06.01.2016	2
GWAS	2016	B	11C071P601	11C071P601	1	4	06.01.2016	5
GWAS	2016	B	11C080P002	11C080P002	1	4	06.01.2016	2.5
GWAS	2016	B	11C103P001	11C103P001	1	4	06.01.2016	4
GWAS	2016	B	11C103P003	11C103P003	1	4	06.01.2016	5
GWAS	2016	B	11C103P005	11C103P005	1	4	06.01.2016	1
GWAS	2016	B	11C105P001	11C105P001	1	4	06.01.2016	5
GWAS	2016	B	11C107P005	11C107P005	1	4	06.01.2016	5
GWAS	2016	B	11C109P002	11C109P002	1	4	06.01.2016	5
GWAS	2016	B	11C109P003	11C109P003	1	4	06.01.2016	2.5
GWAS	2016	B	11C110P003	11C110P003	1	4	06.01.2016	5
GWAS	2016	B	11C113P006	11C113P006	1	4	06.01.2016	5
GWAS	2016	B	11C115P003	11C115P003	1	4	06.01.2016	2.5
GWAS	2016	B	11C116P001	11C116P001	1	4	06.01.2016	3
GWAS	2016	B	11C129P002	11C129P002	1	4	06.01.2016	1
GWAS	2016	B	11C141P001	11C141P001	1	4	06.01.2016	1
GWAS	2016	B	11C145P001	11C145P001	1	4	06.01.2016	1
GWAS	2016	B	11C151P003	11C151P003	1	4	06.01.2016	5
GWAS	2016	B	11C151P008	11C151P008	1	4	06.01.2016	5
GWAS	2016	B	11C153P002	11C153P002	1	4	06.01.2016	1.5
GWAS	2016	B	11C153P003	11C153P003	1	4	06.01.2016	4.5
GWAS	2016	B	11C154P005	11C154P005	1	4	06.01.2016	4
GWAS	2016	B	11C157P001	11C157P001	1	4	06.01.2016	1
GWAS	2016	B	11C158P001	11C158P001	1	4	06.01.2016	4.5
GWAS	2016	B	11C167P004	11C167P004	1	4	06.01.2016	1
GWAS	2016	B	11C179P003	11C179P003	1	4	06.01.2016	2
GWAS	2016	B	11C180P001	11C180P001	1	4	06.01.2016	4
GWAS	2016	B	11C181P002	11C181P002	1	4	06.01.2016	4
GWAS	2016	B	11C190P003	11C190P003	1	4	06.01.2016	5
GWAS	2016	B	11C195P003	11C195P003	1	4	06.01.2016	1
GWAS	2016	B	12C001P605	12C001P605	1	4	06.01.2016	2.5
GWAS	2016	B	12C001P614	12C001P614	1	4	06.01.2016	1
GWAS	2016	B	12C002P006	12C002P006	1	4	06.01.2016	4
GWAS	2016	B	12C002P605	12C002P605	1	4	06.01.2016	3
GWAS	2016	B	12C003P610	12C003P610	1	4	06.01.2016	5
GWAS	2016	B	12C004P001	12C004P001	1	4	06.01.2016	2
GWAS	2016	B	12C004P602	12C004P602	1	4	06.01.2016	2
GWAS	2016	B	12C005P001	12C005P001	1	4	06.01.2016	1
GWAS	2016	B	12C006P001	12C006P001	1	4	06.01.2016	1
GWAS	2016	B	12C006P601	12C006P601	1	4	06.01.2016	1
GWAS	2016	B	12C007P004	12C007P004	1	4	06.01.2016	5
GWAS	2016	B	12C007P601	12C007P601	1	4	06.01.2016	2.5
GWAS	2016	B	12C008P002	12C008P002	1	4	06.01.2016	1
GWAS	2016	B	12C008P607	12C008P607	1	4	06.01.2016	5
GWAS	2016	B	12C009P002	12C009P002	1	4	06.01.2016	4
GWAS	2016	B	12C009P605	12C009P605	1	4	06.01.2016	1
GWAS	2016	B	12C010P603	12C010P603	1	4	06.01.2016	1
GWAS	2016	B	12C011P003	12C011P003	1	4	06.01.2016	5
GWAS	2016	B	12C012P001	12C012P001	1	4	06.01.2016	1
GWAS	2016	B	12C013P001	12C013P001	1	4	06.01.2016	1
GWAS	2016	B	12C013P601	12C013P601	1	4	06.01.2016	5
GWAS	2016	B	12C014P001	12C014P001	1	4	06.01.2016	1
GWAS	2016	B	12C017P601	12C017P601	1	4	06.01.2016	5
GWAS	2016	B	12C018P001	12C018P001	1	4	06.01.2016	5
GWAS	2016	B	12C018P601	12C018P601	1	4	06.01.2016	5
GWAS	2016	B	12C020P001	12C020P001	1	4	06.01.2016	1
GWAS	2016	B	12C021P001	12C021P001	1	4	06.01.2016	1
GWAS	2016	B	12C021P601	12C021P601	1	4	06.01.2016	1
GWAS	2016	B	12C022P602	12C022P602	1	4	06.01.2016	3
GWAS	2016	B	12C023P604	12C023P604	1	4	06.01.2016	1
GWAS	2016	B	12C023P605	12C023P605	1	4	06.01.2016	1
GWAS	2016	B	12C024P609	12C024P609	1	4	06.01.2016	1
GWAS	2016	B	12C024P614	12C024P614	1	4	06.01.2016	2
GWAS	2016	B	12C025P604	12C025P604	1	4	06.01.2016	1
GWAS	2016	B	12C026P604	12C026P604	1	4	06.01.2016	NA
GWAS	2016	B	12C028P001	12C028P001	1	4	06.01.2016	1
GWAS	2016	B	12C028P601	12C028P601	1	4	06.01.2016	1
GWAS	2016	B	12C029P001	12C029P001	1	4	06.01.2016	5
GWAS	2016	B	12C029P601	12C029P601	1	4	06.01.2016	1
GWAS	2016	B	12C030P601	12C030P601	1	4	06.01.2016	2.5
GWAS	2016	B	12C031P003	12C031P003	1	4	06.01.2016	5
GWAS	2016	B	12C032P001	12C032P001	1	4	06.01.2016	2.5
GWAS	2016	B	12C032P603	12C032P603	1	4	06.01.2016	2.5
GWAS	2016	B	12C034P001	12C034P001	1	4	06.01.2016	2
GWAS	2016	B	12C034P601	12C034P601	1	4	06.01.2016	2.5
GWAS	2016	B	12C035P001	12C035P001	1	4	06.01.2016	1
GWAS	2016	B	12C035P601	12C035P601	1	4	06.01.2016	1
GWAS	2016	B	12C036P001	12C036P001	1	4	06.01.2016	4
GWAS	2016	B	12C036P601	12C036P601	1	4	06.01.2016	1.5
GWAS	2016	B	12C037P001	12C037P001	1	4	06.01.2016	1
GWAS	2016	B	12C037P602	12C037P602	1	4	06.01.2016	1
GWAS	2016	B	12C038P001	12C038P001	1	4	06.01.2016	5
GWAS	2016	B	12C038P602	12C038P602	1	4	06.01.2016	1
GWAS	2016	B	12C039P601	12C039P601	1	4	06.01.2016	1
GWAS	2016	B	12C040P002	12C040P002	1	4	06.01.2016	1
GWAS	2016	B	12C041P001	12C041P001	1	4	06.01.2016	1
GWAS	2016	B	12C041P601	12C041P601	1	4	06.01.2016	3
GWAS	2016	B	12C042P602	12C042P602	1	4	06.01.2016	4
GWAS	2016	B	12C043P003	12C043P003	1	4	06.01.2016	2.5
GWAS	2016	B	12C044P002	12C044P002	1	4	06.01.2016	5
GWAS	2016	B	12C046P001	12C046P001	1	4	06.01.2016	3
GWAS	2016	B	12C047P601	12C047P601	1	4	06.01.2016	3
GWAS	2016	B	12C048P002	12C048P002	1	4	06.01.2016	1
GWAS	2016	B	12C048P603	12C048P603	1	4	06.01.2016	1
GWAS	2016	B	12C049P001	12C049P001	1	4	06.01.2016	2.5
GWAS	2016	B	12C049P601	12C049P601	1	4	06.01.2016	5
GWAS	2016	B	12C050P002	12C050P002	1	4	06.01.2016	5
GWAS	2016	B	12C050P603	12C050P603	1	4	06.01.2016	4
GWAS	2016	B	12C052P002	12C052P002	1	4	06.01.2016	5
GWAS	2016	B	12C052P601	12C052P601	1	4	06.01.2016	2.5
GWAS	2016	B	12C053P601	12C053P601	1	4	06.01.2016	1
GWAS	2016	B	12C054P601	12C054P601	1	4	06.01.2016	2
GWAS	2016	B	12C055P001	12C055P001	1	4	06.01.2016	1
GWAS	2016	B	12C055P601	12C055P601	1	4	06.01.2016	5
GWAS	2016	B	12C056P002	12C056P002	1	4	06.01.2016	5
GWAS	2016	B	12C056P601	12C056P601	1	4	06.01.2016	2
GWAS	2016	B	12C058P601	12C058P601	1	4	06.01.2016	1
GWAS	2016	B	12C059P602	12C059P602	1	4	06.01.2016	1.5
GWAS	2016	B	12C060P602	12C060P602	1	4	06.01.2016	1
GWAS	2016	B	12C061P605	12C061P605	1	4	06.01.2016	2
GWAS	2016	B	12C063P602	12C063P602	1	4	06.01.2016	5
GWAS	2016	B	12C064P001	12C064P001	1	4	06.01.2016	1
GWAS	2016	B	12C065P001	12C065P001	1	4	06.01.2016	5
GWAS	2016	B	12C065P602	12C065P602	1	4	06.01.2016	2
GWAS	2016	B	12C066P001	12C066P001	1	4	06.01.2016	2.5
GWAS	2016	B	12C066P606	12C066P606	1	4	06.01.2016	3
GWAS	2016	B	12C067P001	12C067P001	1	4	06.01.2016	5
GWAS	2016	B	12C067P601	12C067P601	1	4	06.01.2016	1
GWAS	2016	B	12C068P002	12C068P002	1	4	06.01.2016	5
GWAS	2016	B	12C068P601	12C068P601	1	4	06.01.2016	5
GWAS	2016	B	12C069P002	12C069P002	1	4	06.01.2016	5
GWAS	2016	B	12C069P607	12C069P607	1	4	06.01.2016	2
GWAS	2016	B	12C070P001	12C070P001	1	4	06.01.2016	1.5
GWAS	2016	B	12C070P004	12C070P004	1	4	06.01.2016	5
GWAS	2016	B	12C070P602	12C070P602	1	4	06.01.2016	1
GWAS	2016	B	12C071P001	12C071P001	1	4	06.01.2016	1
GWAS	2016	B	12C071P602	12C071P602	1	4	06.01.2016	5
GWAS	2016	B	12C072P001	12C072P001	1	4	06.01.2016	1
GWAS	2016	B	12C072P606	12C072P606	1	4	06.01.2016	1
GWAS	2016	B	12C073P001	12C073P001	1	4	06.01.2016	5
GWAS	2016	B	12C073P602	12C073P602	1	4	06.01.2016	5
GWAS	2016	B	12C074P601	12C074P601	1	4	06.01.2016	2
GWAS	2016	B	12C075P001	12C075P001	1	4	06.01.2016	1
GWAS	2016	B	12C075P601	12C075P601	1	4	06.01.2016	5
GWAS	2016	B	12C076P001	12C076P001	1	4	06.01.2016	5
GWAS	2016	B	12C077P601	12C077P601	1	4	06.01.2016	5
GWAS	2016	B	12C078P602	12C078P602	1	4	06.01.2016	1
GWAS	2016	B	12C079P001	12C079P001	1	4	06.01.2016	1
GWAS	2016	B	12C080P002	12C080P002	1	4	06.01.2016	4
GWAS	2016	B	12C081P001	12C081P001	1	4	06.01.2016	2
GWAS	2016	B	12C082P001	12C082P001	1	4	06.01.2016	5
GWAS	2016	B	12C082P602	12C082P602	1	4	06.01.2016	2.5
GWAS	2016	B	12C083P003	12C083P003	1	4	06.01.2016	5
GWAS	2016	B	12C083P602	12C083P602	1	4	06.01.2016	5
GWAS	2016	B	12C084P002	12C084P002	1	4	06.01.2016	2
GWAS	2016	B	12C084P606	12C084P606	1	4	06.01.2016	1
GWAS	2016	B	12C085P001	12C085P001	1	4	06.01.2016	5
GWAS	2016	B	12C085P601	12C085P601	1	4	06.01.2016	5
GWAS	2016	B	12C087P602	12C087P602	1	4	06.01.2016	5
GWAS	2016	B	12C088P001	12C088P001	1	4	06.01.2016	1
GWAS	2016	B	12C088P804	12C088P804	1	4	06.01.2016	1
GWAS	2016	B	12C089P002	12C089P002	1	4	06.01.2016	5
GWAS	2016	B	12C089P602	12C089P602	1	4	06.01.2016	2.5
GWAS	2016	B	12C090P603	12C090P603	1	4	06.01.2016	5
GWAS	2016	B	12C091P001	12C091P001	1	4	06.01.2016	5
GWAS	2016	B	12C091P601	12C091P601	1	4	06.01.2016	5
GWAS	2016	B	12C092P602	12C092P602	1	4	06.01.2016	2
GWAS	2016	B	12C093P604	12C093P604	1	4	06.01.2016	5
GWAS	2016	B	12C094P604	12C094P604	1	4	06.01.2016	5
GWAS	2016	B	12C095P002	12C095P002	1	4	06.01.2016	1
GWAS	2016	B	12C095P602	12C095P602	1	4	06.01.2016	5
GWAS	2016	B	12C096P002	12C096P002	1	4	06.01.2016	5
GWAS	2016	B	12C096P602	12C096P602	1	4	06.01.2016	4
GWAS	2016	B	12C097P003	12C097P003	1	4	06.01.2016	3
GWAS	2016	B	12C097P602	12C097P602	1	4	06.01.2016	2.5
GWAS	2016	B	12C097P605	12C097P605	1	4	06.01.2016	2.5
GWAS	2016	B	12C098P001	12C098P001	1	4	06.01.2016	2
GWAS	2016	B	12C099P003	12C099P003	1	4	06.01.2016	1
GWAS	2016	B	12C100P002	12C100P002	1	4	06.01.2016	5
GWAS	2016	B	12C104P001	12C104P001	1	4	06.01.2016	2.5
GWAS	2016	B	12C104P004	12C104P004	1	4	06.01.2016	5
GWAS	2016	B	12C104P005	12C104P005	1	4	06.01.2016	2.5
GWAS	2016	B	12C104P006	12C104P006	1	4	06.01.2016	5
GWAS	2016	B	12C104P007	12C104P007	1	4	06.01.2016	5
GWAS	2016	B	12C105P002	12C105P002	1	4	06.01.2016	5
GWAS	2016	B	12C105P004	12C105P004	1	4	06.01.2016	5
GWAS	2016	B	12C105P010	12C105P010	1	4	06.01.2016	3
GWAS	2016	B	12C106P006	12C106P006	1	4	06.01.2016	1
GWAS	2016	B	12C107P001	12C107P001	1	4	06.01.2016	NA
GWAS	2016	B	12C108P003	12C108P003	1	4	06.01.2016	2.5
GWAS	2016	B	12C108P004	12C108P004	1	4	06.01.2016	4
GWAS	2016	B	12C109P002	12C109P002	1	4	06.01.2016	4
GWAS	2016	B	12C110P002	12C110P002	1	4	06.01.2016	1
GWAS	2016	B	12C110P004	12C110P004	1	4	06.01.2016	2.5
GWAS	2016	B	12C111P001	12C111P001	1	4	06.01.2016	2
GWAS	2016	B	12C111P002	12C111P002	1	4	06.01.2016	3.5
GWAS	2016	B	12C112P004	12C112P004	1	4	06.01.2016	3
GWAS	2016	B	12C112P007	12C112P007	1	4	06.01.2016	NA
GWAS	2016	B	12C112P008	12C112P008	1	4	06.01.2016	4
GWAS	2016	B	12C113P002	12C113P002	1	4	06.01.2016	2
GWAS	2016	B	12C114P001	12C114P001	1	4	06.01.2016	2
GWAS	2016	B	12C115P005	12C115P005	1	4	06.01.2016	1
GWAS	2016	B	12C115P006	12C115P006	1	4	06.01.2016	1
GWAS	2016	B	12C116P001	12C116P001	1	4	06.01.2016	5
GWAS	2016	B	12C117P001	12C117P001	1	4	06.01.2016	2
GWAS	2016	B	12C118P001	12C118P001	1	4	06.01.2016	3
GWAS	2016	B	12C118P002	12C118P002	1	4	06.01.2016	5
GWAS	2016	B	12C122P001	12C122P001	1	4	06.01.2016	5
GWAS	2016	B	12C124P001	12C124P001	1	4	06.01.2016	1
GWAS	2016	B	12C125P003	12C125P003	1	4	06.01.2016	5
GWAS	2016	B	12C128P002	12C128P002	1	4	06.01.2016	5
GWAS	2016	B	12C129P002	12C129P002	1	4	06.01.2016	2
GWAS	2016	B	12C130P002	12C130P002	1	4	06.01.2016	2.5
GWAS	2016	B	12C131P001	12C131P001	1	4	06.01.2016	2.5
GWAS	2016	B	12C132P005	12C132P005	1	4	06.01.2016	5
GWAS	2016	B	12C137P002	12C137P002	1	4	06.01.2016	3
GWAS	2016	B	12C138P001	12C138P001	1	4	06.01.2016	5
GWAS	2016	B	12C140P001	12C140P001	1	4	06.01.2016	5
GWAS	2016	B	12C142P001	12C142P001	1	4	06.01.2016	1
GWAS	2016	B	12C143P001	12C143P001	1	4	06.01.2016	1
GWAS	2016	B	12C145P001	12C145P001	1	4	06.01.2016	5
GWAS	2016	B	12C146P001	12C146P001	1	4	06.01.2016	1
GWAS	2016	B	12C147P002	12C147P002	1	4	06.01.2016	2.5
GWAS	2016	B	12C148P005	12C148P005	1	4	06.01.2016	1
GWAS	2016	B	12C149P002	12C149P002	1	4	06.01.2016	1
GWAS	2016	B	12C151P001	12C151P001	1	4	06.01.2016	5
GWAS	2016	B	12C152P002	12C152P002	1	4	06.01.2016	1
GWAS	2016	B	12C155P001	12C155P001	1	4	06.01.2016	1
GWAS	2016	B	12C159P001	12C159P001	1	4	06.01.2016	2.5
GWAS	2016	B	12C160P002	12C160P002	1	4	06.01.2016	2
GWAS	2016	B	12C160P003	12C160P003	1	4	06.01.2016	5
GWAS	2016	B	12C161P003	12C161P003	1	4	06.01.2016	2
GWAS	2016	B	12C162P001	12C162P001	1	4	06.01.2016	2.5
GWAS	2016	B	12C162P003	12C162P003	1	4	06.01.2016	2.5
GWAS	2016	B	12C166P002	12C166P002	1	4	06.01.2016	NA
GWAS	2016	B	12C167P002	12C167P002	1	4	06.01.2016	5
GWAS	2016	B	12C169P003	12C169P003	1	4	06.01.2016	2
GWAS	2016	B	12C169P004	12C169P004	1	4	06.01.2016	2
GWAS	2016	B	12C170P001	12C170P001	1	4	06.01.2016	3.5
GWAS	2016	B	12C171P005	12C171P005	1	4	06.01.2016	2
GWAS	2016	B	12C172P002	12C172P002	1	4	06.01.2016	3
GWAS	2016	B	12C175P001	12C175P001	1	4	06.01.2016	3
GWAS	2016	B	12C176P001	12C176P001	1	4	06.01.2016	2.5
GWAS	2016	B	12C177P001	12C177P001	1	4	06.01.2016	1.5
GWAS	2016	B	12C178P004	12C178P004	1	4	06.01.2016	4
GWAS	2016	B	12C178P005	12C178P005	1	4	06.01.2016	4.5
GWAS	2016	B	12C179P001	12C179P001	1	4	06.01.2016	2.5
GWAS	2016	B	12C180P004	12C180P004	1	4	06.01.2016	5
GWAS	2016	B	12C181P001	12C181P001	1	4	06.01.2016	2.5
GWAS	2016	B	12C182P005	12C182P005	1	4	06.01.2016	2.5
GWAS	2016	B	12C183P001	12C183P001	1	4	06.01.2016	1
GWAS	2016	B	12C184P001	12C184P001	1	4	06.01.2016	5
GWAS	2016	B	12C185P001	12C185P001	1	4	06.01.2016	2
GWAS	2016	B	12C186P001	12C186P001	1	4	06.01.2016	1
GWAS	2016	B	12C189P001	12C189P001	1	4	06.01.2016	1
GWAS	2016	B	12C190P003	12C190P003	1	4	06.01.2016	2.5
GWAS	2016	B	12C191P001	12C191P001	1	4	06.01.2016	1
GWAS	2016	B	12C192P001	12C192P001	1	4	06.01.2016	2.5
GWAS	2016	B	12C193P001	12C193P001	1	4	06.01.2016	1
GWAS	2016	B	12C194P001	12C194P001	1	4	06.01.2016	3
GWAS	2016	B	37C020P045	37C020P045	1	4	06.01.2016	1
GWAS	2016	B	39C082P019	39C082P019	1	4	06.01.2016	1
GWAS	2016	B	51S001P001	51S001P001	1	4	06.01.2016	1.5
GWAS	2016	B	55C023P001	55C023P001	1	4	06.01.2016	2.5
GWAS	2016	B	59C039P001	59C039P001	1	4	06.01.2016	2
GWAS	2016	B	61S016P099	61S016P099	1	4	06.01.2016	5
GWAS	2016	B	61S018P045	61S018P045	1	4	06.01.2016	NA
GWAS	2016	B	61S016P006	61S016P006	1	4	06.01.2016	1
GWAS	2016	B	65C065P601	65C065P601	1	4	06.01.2016	1
GWAS	2016	B	69C072P102	69C072P102	1	4	06.01.2016	1
GWAS	2016	B	70C003P117	70C003P117	1	4	06.01.2016	3
GWAS	2016	B	70C027P103	70C027P103	1	4	06.01.2016	1
GWAS	2016	B	70C030P101	70C030P101	1	4	06.01.2016	2.5
GWAS	2016	B	71C098P605	71C098P605	1	4	06.01.2016	5
GWAS	2016	B	72C361P105	72C361P105	1	4	06.01.2016	1
GWAS	2016	B	75C121P101	75C121P101	1	4	06.01.2016	2.5
GWAS	2016	B	81C016P604	81C016P604	1	4	06.01.2016	4
GWAS	2016	B	83C076P001	83C076P001	1	4	06.01.2016	2
GWAS	2016	B	85C093P003	85C093P003	1	4	06.01.2016	2
GWAS	2016	B	86C065P202	86C065P202	1	4	06.01.2016	5
GWAS	2016	B	86C169P001	86C169P001	1	4	06.01.2016	5
GWAS	2016	B	88C031P003	88C031P003	1	4	06.01.2016	1
GWAS	2016	B	88C118P603	88C118P603	1	4	06.01.2016	5
GWAS	2016	B	88C270P001	88C270P001	1	4	06.01.2016	5
GWAS	2016	B	89C029P623	89C029P623	1	4	06.01.2016	4
GWAS	2016	B	89C206P002	89C206P002	1	4	06.01.2016	1
GWAS	2016	B	89C208P012	89C208P012	1	4	06.01.2016	1
GWAS	2016	B	89C230P007	89C230P007	1	4	06.01.2016	5
GWAS	2016	B	90C253P003	90C253P003	1	4	06.01.2016	4.5
GWAS	2016	B	91C326P001	91C326P001	1	4	06.01.2016	4
GWAS	2016	B	91C326P003	91C326P003	1	4	06.01.2016	5
GWAS	2016	B	92C063P002	92C063P002	1	4	06.01.2016	2
GWAS	2016	B	92C245P002	92C245P002	1	4	06.01.2016	1
GWAS	2016	B	93C060P002	93C060P002	1	4	06.01.2016	5
GWAS	2016	B	94C016P001	94C016P001	1	4	06.01.2016	5
GWAS	2016	B	95C179P002	95C179P002	1	4	06.01.2016	1
GWAS	2016	B	95C197P001	95C197P001	1	4	06.01.2016	1
GWAS	2016	B	95C197P003	95C197P003	1	4	06.01.2016	1
GWAS	2016	B	97C079P014	97C079P014	1	4	06.01.2016	5
GWAS	2016	B	97C085P006	97C085P006	1	4	06.01.2016	1
GWAS	2016	B	97C086P001	97C086P001	1	4	06.01.2016	1
GWAS	2016	B	97C111P005	97C111P005	1	4	06.01.2016	5
GWAS	2016	B	97C156P002	97C156P002	1	4	06.01.2016	5
GWAS	2016	B	97C192P001	97C192P001	1	4	06.01.2016	1.5
GWAS	2016	B	97C209P001	97C209P001	1	4	06.01.2016	1
GWAS	2016	B	98C152P008	98C152P008	1	4	06.01.2016	1
GWAS	2016	B	98C153P003	98C153P003	1	4	06.01.2016	2.5
GWAS	2016	B	99C088P007	99C088P007	1	4	06.01.2016	2.5
GWAS	2016	B	63C125P039	Aiko	1	4	06.01.2016	1
GWAS	2016	B	97C117P003	Albion	1	4	06.01.2016	NA
GWAS	2016	B	97C117P003	Albion	1	4	06.01.2016	3
GWAS	2016	B	97C117P003	Albion	1	4	06.01.2016	5
GWAS	2016	B	97C117P003	Albion	1	4	06.01.2016	5
GWAS	2016	B	97C117P003	Albion	1	4	06.01.2016	4.5
GWAS	2016	B	97C117P003	Albion	1	4	06.01.2016	2.5
GWAS	2016	B	56S115P011	Aliso	1	4	06.01.2016	2
GWAS	2016	B	88C066P610	Anaheim	1	4	06.01.2016	2.5
GWAS	2016	B	91C248P003	Aromas	1	4	06.01.2016	3
GWAS	2016	B	04C039P001	Benicia	1	4	06.01.2016	2
GWAS	2016	B	72C271P105	Brighton	1	4	06.01.2016	2
GWAS	2016	B	65CA1501	CA_1501	1	4	06.01.2016	5
GWAS	2016	B	08C181P001	Cabrillo	1	4	06.01.2016	5
GWAS	2016	B	88C029P603	Camarosa	1	4	06.01.2016	2.5
GWAS	2016	B	94C003P011	Camino_Real	1	4	06.01.2016	5
GWAS	2016	B	83C093P006	Capitola	1	4	06.01.2016	1.5
GWAS	2016	B	88C070P613	Carlsbad	1	4	06.01.2016	5
GWAS	2016	B	77C032P103	Chandler	1	4	06.01.2016	2
GWAS	2016	B	65C272P104	Cruz	1	4	06.01.2016	1
GWAS	2016	B	91C248P006	Diamante	1	4	06.01.2016	1
GWAS	2016	B	36C039P004	Donner	1	4	06.01.2016	4
GWAS	2016	B	70C003P108	Douglas	1	4	06.01.2016	5
GWAS	2016	B	PI551394	Earliglow	1	4	06.01.2016	1
GWAS	2016	B	53C009P010	Fresno	1	4	06.01.2016	1
GWAS	2016	B	08C132P608	Fronteras	1	4	06.01.2016	1
GWAS	2016	B	08C132P608	Fronteras	1	4	06.01.2016	1
GWAS	2016	B	08C132P608	Fronteras	1	4	06.01.2016	1
GWAS	2016	B	08C132P608	Fronteras	1	4	06.01.2016	1
GWAS	2016	B	08C132P608	Fronteras	1	4	06.01.2016	1
GWAS	2016	B	08C132P608	Fronteras	1	4	06.01.2016	1
GWAS	2016	B	91C248P002	Gaviota	1	4	06.01.2016	4
GWAS	2016	B	08C055P002	Grenada	1	4	06.01.2016	4.5
GWAS	2016	B	PI551407	Guardian	1	4	06.01.2016	1
GWAS	2016	B	69C141P101	Hecker	1	4	06.01.2016	1.5
GWAS	2016	B	82C014P603	Irvine	1	4	06.01.2016	1
GWAS	2016	B	88C066P616	Laguna	1	4	06.01.2016	2
GWAS	2016	B	36C003P001	Lassen	1	4	06.01.2016	5
GWAS	2016	B	07C132P003	Merced	1	4	06.01.2016	2.5
GWAS	2016	B	04C044P603	Mojave	1	4	06.01.2016	5
GWAS	2016	B	01C132P003	Monterey	1	4	06.01.2016	3
GWAS	2016	B	75C071P105	Muir	1	4	06.01.2016	2.5
GWAS	2016	B	81C043P603	Oso_Grande	1	4	06.01.2016	2.5
GWAS	2016	B	91C324P001	Pacific	1	4	06.01.2016	5
GWAS	2016	B	71C101P611	Pajaro	1	4	06.01.2016	5
GWAS	2016	B	00C259P002	Palomar	1	4	06.01.2016	2.5
GWAS	2016	B	77C030P605	Parker	1	4	06.01.2016	2.5
GWAS	2016	B	08C020P602	Petaluma	1	4	06.01.2016	5
GWAS	2016	B	01C206P005	Portola	1	4	06.01.2016	1.5
GWAS	2016	B	01C139P002	San_Andreas	1	4	06.01.2016	1.5
GWAS	2016	B	83C049P001	Seascape	1	4	06.01.2016	2.5
GWAS	2016	B	75C071P107	Selva	1	4	06.01.2016	2
GWAS	2016	B	56C124P012	Sequoia	1	4	06.01.2016	3.5
GWAS	2016	B	35C035P008	Shasta	1	4	06.01.2016	1
GWAS	2016	B	35C093P011	Solana	1	4	06.01.2016	1
GWAS	2016	B	72C330P107	Soquel	1	4	06.01.2016	1
GWAS	2016	B	53C009P002	Tioga	1	4	06.01.2016	1
GWAS	2016	B	63C120P001	Tufts	1	4	06.01.2016	1
GWAS	2016	B	96C042P601	Ventana	1	4	06.01.2016	1
GWAS	2016	B	52C016P007	Wiltguard	1	4	06.01.2016	1
GWAS	2016	C	00C003P602	00C003P602	1	4	06.01.2016	1
GWAS	2016	C	00C018P601	00C018P601	1	4	06.01.2016	5
GWAS	2016	C	00C027P601	00C027P601	1	4	06.01.2016	5
GWAS	2016	C	00C038P606	00C038P606	1	4	06.01.2016	1
GWAS	2016	C	00C046P601	00C046P601	1	4	06.01.2016	5
GWAS	2016	C	00C057P613	00C057P613	1	4	06.01.2016	1
GWAS	2016	C	00C139P003	00C139P003	1	4	06.01.2016	3.5
GWAS	2016	C	01C053P602	01C053P602	1	4	06.01.2016	1
GWAS	2016	C	01C057P601	01C057P601	1	4	06.01.2016	1
GWAS	2016	C	01C080P602	01C080P602	1	4	06.01.2016	1
GWAS	2016	C	01C111P004	01C111P004	1	4	06.01.2016	1
GWAS	2016	C	01C134P001	01C134P001	1	4	06.01.2016	2.5
GWAS	2016	C	01C134P003	01C134P003	1	4	06.01.2016	5
GWAS	2016	C	01C136P001	01C136P001	1	4	06.01.2016	1.5
GWAS	2016	C	01C138P001	01C138P001	1	4	06.01.2016	2.5
GWAS	2016	C	01C141P002	01C141P002	1	4	06.01.2016	2
GWAS	2016	C	01C158P001	01C158P001	1	4	06.01.2016	1
GWAS	2016	C	01C203P006	01C203P006	1	4	06.01.2016	1
GWAS	2016	C	02C068P608	02C068P608	1	4	06.01.2016	3.5
GWAS	2016	C	02C093P006	02C093P006	1	4	06.01.2016	3
GWAS	2016	C	02C095P004	02C095P004	1	4	06.01.2016	2.5
GWAS	2016	C	02C103P002	02C103P002	1	4	06.01.2016	1
GWAS	2016	C	02C132P006	02C132P006	1	4	06.01.2016	2.5
GWAS	2016	C	02C134P003	02C134P003	1	4	06.01.2016	NA
GWAS	2016	C	02C143P003	02C143P003	1	4	06.01.2016	2.5
GWAS	2016	C	02C144P003	02C144P003	1	4	06.01.2016	2.5
GWAS	2016	C	02C156P003	02C156P003	1	4	06.01.2016	3
GWAS	2016	C	02C229P001	02C229P001	1	4	06.01.2016	2.5
GWAS	2016	C	02C230P001	02C230P001	1	4	06.01.2016	2
GWAS	2016	C	03C001P606	03C001P606	1	4	06.01.2016	1
GWAS	2016	C	03C065P601	03C065P601	1	4	06.01.2016	1
GWAS	2016	C	03C075P601	03C075P601	1	4	06.01.2016	2
GWAS	2016	C	03C092P008	03C092P008	1	4	06.01.2016	1.5
GWAS	2016	C	03C102P002	03C102P002	1	4	06.01.2016	1
GWAS	2016	C	03C111P005	03C111P005	1	4	06.01.2016	2.5
GWAS	2016	C	03C114P003	03C114P003	1	4	06.01.2016	2.5
GWAS	2016	C	03C132P003	03C132P003	1	4	06.01.2016	3
GWAS	2016	C	03C149P008	03C149P008	1	4	06.01.2016	2.5
GWAS	2016	C	04C001P601	04C001P601	1	4	06.01.2016	5
GWAS	2016	C	04C009P005	04C009P005	1	4	06.01.2016	3
GWAS	2016	C	04C013P604	04C013P604	1	4	06.01.2016	3
GWAS	2016	C	04C018P004	04C018P004	1	4	06.01.2016	1
GWAS	2016	C	04C020P604	04C020P604	1	4	06.01.2016	3
GWAS	2016	C	04C038P603	04C038P603	1	4	06.01.2016	1
GWAS	2016	C	04C041P006	04C041P006	1	4	06.01.2016	1
GWAS	2016	C	04C041P007	04C041P007	1	4	06.01.2016	1
GWAS	2016	C	04C045P605	04C045P605	1	4	06.01.2016	5
GWAS	2016	C	04C053P001	04C053P001	1	4	06.01.2016	3
GWAS	2016	C	04C056P608	04C056P608	1	4	06.01.2016	3.5
GWAS	2016	C	04C073P002	04C073P002	1	4	06.01.2016	3
GWAS	2016	C	04C076P004	04C076P004	1	4	06.01.2016	1
GWAS	2016	C	04C077P002	04C077P002	1	4	06.01.2016	2
GWAS	2016	C	04C085P601	04C085P601	1	4	06.01.2016	1
GWAS	2016	C	05C027P605	05C027P605	1	4	06.01.2016	5
GWAS	2016	C	05C054P611	05C054P611	1	4	06.01.2016	2.5
GWAS	2016	C	05C065P608	05C065P608	1	4	06.01.2016	1
GWAS	2016	C	05C092P011	05C092P011	1	4	06.01.2016	5
GWAS	2016	C	05C095P004	05C095P004	1	4	06.01.2016	3
GWAS	2016	C	05C097P007	05C097P007	1	4	06.01.2016	4.5
GWAS	2016	C	05C099P006	05C099P006	1	4	06.01.2016	2.5
GWAS	2016	C	05C106P002	05C106P002	1	4	06.01.2016	5
GWAS	2016	C	05C107P002	05C107P002	1	4	06.01.2016	3
GWAS	2016	C	05C108P007	05C108P007	1	4	06.01.2016	2
GWAS	2016	C	05C109P002	05C109P002	1	4	06.01.2016	5
GWAS	2016	C	05C115P005	05C115P005	1	4	06.01.2016	2
GWAS	2016	C	05C117P005	05C117P005	1	4	06.01.2016	1
GWAS	2016	C	05C120P009	05C120P009	1	4	06.01.2016	1.5
GWAS	2016	C	05C132P001	05C132P001	1	4	06.01.2016	5
GWAS	2016	C	05C144P003	05C144P003	1	4	06.01.2016	1
GWAS	2016	C	05C148P002	05C148P002	1	4	06.01.2016	2
GWAS	2016	C	05C154P002	05C154P002	1	4	06.01.2016	1
GWAS	2016	C	05C165P001	05C165P001	1	4	06.01.2016	5
GWAS	2016	C	05C172P002	05C172P002	1	4	06.01.2016	2.5
GWAS	2016	C	05C194P001	05C194P001	1	4	06.01.2016	3
GWAS	2016	C	05C197P002	05C197P002	1	4	06.01.2016	1
GWAS	2016	C	05C199P010	05C199P010	1	4	06.01.2016	5
GWAS	2016	C	05C205P002	05C205P002	1	4	06.01.2016	2
GWAS	2016	C	05C206P005	05C206P005	1	4	06.01.2016	3
GWAS	2016	C	06C016P602	06C016P602	1	4	06.01.2016	3
GWAS	2016	C	06C020P605	06C020P605	1	4	06.01.2016	1
GWAS	2016	C	06C043P603	06C043P603	1	4	06.01.2016	4
GWAS	2016	C	06C050P611	06C050P611	1	4	06.01.2016	5
GWAS	2016	C	06C051P609	06C051P609	1	4	06.01.2016	3
GWAS	2016	C	06C066P603	06C066P603	1	4	06.01.2016	3
GWAS	2016	C	06C090P605	06C090P605	1	4	06.01.2016	1.5
GWAS	2016	C	06C102P002	06C102P002	1	4	06.01.2016	NA
GWAS	2016	C	06C106P002	06C106P002	1	4	06.01.2016	5
GWAS	2016	C	06C109P003	06C109P003	1	4	06.01.2016	5
GWAS	2016	C	06C110P004	06C110P004	1	4	06.01.2016	1
GWAS	2016	C	06C111P001	06C111P001	1	4	06.01.2016	4
GWAS	2016	C	06C132P001	06C132P001	1	4	06.01.2016	5
GWAS	2016	C	06C132P002	06C132P002	1	4	06.01.2016	1
GWAS	2016	C	06C137P002	06C137P002	1	4	06.01.2016	5
GWAS	2016	C	06C202P001	06C202P001	1	4	06.01.2016	5
GWAS	2016	C	06C204P001	06C204P001	1	4	06.01.2016	1
GWAS	2016	C	07C001P608	07C001P608	1	4	06.01.2016	1
GWAS	2016	C	07C009P601	07C009P601	1	4	06.01.2016	2
GWAS	2016	C	07C043P001	07C043P001	1	4	06.01.2016	2
GWAS	2016	C	07C049P003	07C049P003	1	4	06.01.2016	1
GWAS	2016	C	07C050P601	07C050P601	1	4	06.01.2016	1
GWAS	2016	C	07C064P002	07C064P002	1	4	06.01.2016	2.5
GWAS	2016	C	07C064P003	07C064P003	1	4	06.01.2016	1
GWAS	2016	C	07C064P005	07C064P005	1	4	06.01.2016	5
GWAS	2016	C	07C067P608	07C067P608	1	4	06.01.2016	3
GWAS	2016	C	07C090P606	07C090P606	1	4	06.01.2016	3
GWAS	2016	C	07C092P003	07C092P003	1	4	06.01.2016	1
GWAS	2016	C	07C119P001	07C119P001	1	4	06.01.2016	1
GWAS	2016	C	07C120P003	07C120P003	1	4	06.01.2016	1
GWAS	2016	C	07C134P001	07C134P001	1	4	06.01.2016	1
GWAS	2016	C	07C141P001	07C141P001	1	4	06.01.2016	NA
GWAS	2016	C	07C148P001	07C148P001	1	4	06.01.2016	1.5
GWAS	2016	C	07C148P003	07C148P003	1	4	06.01.2016	2
GWAS	2016	C	07C203P001	07C203P001	1	4	06.01.2016	3
GWAS	2016	C	07C216P001	07C216P001	1	4	06.01.2016	1
GWAS	2016	C	08C005P601	08C005P601	1	4	06.01.2016	4
GWAS	2016	C	08C013P605	08C013P605	1	4	06.01.2016	3
GWAS	2016	C	08C013P606	08C013P606	1	4	06.01.2016	5
GWAS	2016	C	08C017P005	08C017P005	1	4	06.01.2016	4
GWAS	2016	C	08C018P005	08C018P005	1	4	06.01.2016	1
GWAS	2016	C	08C037P603	08C037P603	1	4	06.01.2016	1
GWAS	2016	C	08C043P001	08C043P001	1	4	06.01.2016	4.5
GWAS	2016	C	08C043P004	08C043P004	1	4	06.01.2016	NA
GWAS	2016	C	08C043P010	08C043P010	1	4	06.01.2016	1
GWAS	2016	C	08C075P001	08C075P001	1	4	06.01.2016	5
GWAS	2016	C	08C114P005	08C114P005	1	4	06.01.2016	5
GWAS	2016	C	08C123P001	08C123P001	1	4	06.01.2016	5
GWAS	2016	C	08C124P001	08C124P001	1	4	06.01.2016	2.5
GWAS	2016	C	08C128P002	08C128P002	1	4	06.01.2016	1
GWAS	2016	C	08C129P004	08C129P004	1	4	06.01.2016	3
GWAS	2016	C	08C131P003	08C131P003	1	4	06.01.2016	NA
GWAS	2016	C	08C132P003	08C132P003	1	4	06.01.2016	2.5
GWAS	2016	C	08C135P004	08C135P004	1	4	06.01.2016	2.5
GWAS	2016	C	08C137P001	08C137P001	1	4	06.01.2016	NA
GWAS	2016	C	08C137P002	08C137P002	1	4	06.01.2016	3
GWAS	2016	C	08C138P003	08C138P003	1	4	06.01.2016	1
GWAS	2016	C	08C150P009	08C150P009	1	4	06.01.2016	5
GWAS	2016	C	08C182P002	08C182P002	1	4	06.01.2016	2.5
GWAS	2016	C	09C012P605	09C012P605	1	4	06.01.2016	5
GWAS	2016	C	09C016P601	09C016P601	1	4	06.01.2016	1
GWAS	2016	C	09C020P609	09C020P609	1	4	06.01.2016	1
GWAS	2016	C	09C032P605	09C032P605	1	4	06.01.2016	5
GWAS	2016	C	09C037P001	09C037P001	1	4	06.01.2016	5
GWAS	2016	C	09C048P003	09C048P003	1	4	06.01.2016	1
GWAS	2016	C	09C056P608	09C056P608	1	4	06.01.2016	5
GWAS	2016	C	09C061P602	09C061P602	1	4	06.01.2016	1
GWAS	2016	C	09C061P606	09C061P606	1	4	06.01.2016	1
GWAS	2016	C	09C062P001	09C062P001	1	4	06.01.2016	1
GWAS	2016	C	09C068P602	09C068P602	1	4	06.01.2016	3
GWAS	2016	C	09C078P603	09C078P603	1	4	06.01.2016	5
GWAS	2016	C	09C085P002	09C085P002	1	4	06.01.2016	2
GWAS	2016	C	09C085P601	09C085P601	1	4	06.01.2016	5
GWAS	2016	C	09C088P602	09C088P602	1	4	06.01.2016	1
GWAS	2016	C	09C091P001	09C091P001	1	4	06.01.2016	1
GWAS	2016	C	09C097P003	09C097P003	1	4	06.01.2016	1
GWAS	2016	C	09C100P003	09C100P003	1	4	06.01.2016	5
GWAS	2016	C	09C103P002	09C103P002	1	4	06.01.2016	3
GWAS	2016	C	09C108P002	09C108P002	1	4	06.01.2016	3.5
GWAS	2016	C	09C132P003	09C132P003	1	4	06.01.2016	1.5
GWAS	2016	C	09C141P001	09C141P001	1	4	06.01.2016	1
GWAS	2016	C	09C154P605	09C154P605	1	4	06.01.2016	5
GWAS	2016	C	09C166P007	09C166P007	1	4	06.01.2016	4
GWAS	2016	C	09C171P602	09C171P602	1	4	06.01.2016	NA
GWAS	2016	C	09C180P001	09C180P001	1	4	06.01.2016	2.5
GWAS	2016	C	10C001P604	10C001P604	1	4	06.01.2016	5
GWAS	2016	C	10C005P602	10C005P602	1	4	06.01.2016	1.5
GWAS	2016	C	10C007P003	10C007P003	1	4	06.01.2016	1
GWAS	2016	C	10C012P003	10C012P003	1	4	06.01.2016	5
GWAS	2016	C	10C015P605	10C015P605	1	4	06.01.2016	1
GWAS	2016	C	10C017P001	10C017P001	1	4	06.01.2016	1
GWAS	2016	C	10C017P002	10C017P002	1	4	06.01.2016	1
GWAS	2016	C	10C023P001	10C023P001	1	4	06.01.2016	2.5
GWAS	2016	C	10C024P002	10C024P002	1	4	06.01.2016	5
GWAS	2016	C	10C025P601	10C025P601	1	4	06.01.2016	3
GWAS	2016	C	10C030P001	10C030P001	1	4	06.01.2016	5
GWAS	2016	C	10C031P602	10C031P602	1	4	06.01.2016	4
GWAS	2016	C	10C037P604	10C037P604	1	4	06.01.2016	3
GWAS	2016	C	10C038P601	10C038P601	1	4	06.01.2016	3.5
GWAS	2016	C	10C070P611	10C070P611	1	4	06.01.2016	5
GWAS	2016	C	10C077P601	10C077P601	1	4	06.01.2016	5
GWAS	2016	C	10C078P603	10C078P603	1	4	06.01.2016	4
GWAS	2016	C	10C080P605	10C080P605	1	4	06.01.2016	3
GWAS	2016	C	10C081P001	10C081P001	1	4	06.01.2016	5
GWAS	2016	C	10C087P002	10C087P002	1	4	06.01.2016	2.5
GWAS	2016	C	10C099P001	10C099P001	1	4	06.01.2016	2.5
GWAS	2016	C	10C105P001	10C105P001	1	4	06.01.2016	1
GWAS	2016	C	10C106P001	10C106P001	1	4	06.01.2016	1
GWAS	2016	C	10C106P008	10C106P008	1	4	06.01.2016	2
GWAS	2016	C	10C116P001	10C116P001	1	4	06.01.2016	2.5
GWAS	2016	C	10C122P003	10C122P003	1	4	06.01.2016	1
GWAS	2016	C	10C122P006	10C122P006	1	4	06.01.2016	1
GWAS	2016	C	10C124P002	10C124P002	1	4	06.01.2016	3
GWAS	2016	C	10C126P003	10C126P003	1	4	06.01.2016	5
GWAS	2016	C	10C127P001	10C127P001	1	4	06.01.2016	3
GWAS	2016	C	10C134P004	10C134P004	1	4	06.01.2016	5
GWAS	2016	C	10C136P004	10C136P004	1	4	06.01.2016	4
GWAS	2016	C	10C137P005	10C137P005	1	4	06.01.2016	2.5
GWAS	2016	C	10C140P001	10C140P001	1	4	06.01.2016	2.5
GWAS	2016	C	10C141P001	10C141P001	1	4	06.01.2016	5
GWAS	2016	C	10C143P001	10C143P001	1	4	06.01.2016	3
GWAS	2016	C	10C144P001	10C144P001	1	4	06.01.2016	1
GWAS	2016	C	10C144P002	10C144P002	1	4	06.01.2016	1
GWAS	2016	C	10C144P003	10C144P003	1	4	06.01.2016	2.5
GWAS	2016	C	10C160P001	10C160P001	1	4	06.01.2016	1
GWAS	2016	C	10C160P009	10C160P009	1	4	06.01.2016	3
GWAS	2016	C	10C169P001	10C169P001	1	4	06.01.2016	5
GWAS	2016	C	10C187P004	10C187P004	1	4	06.01.2016	1
GWAS	2016	C	11C021P001	11C021P001	1	4	06.01.2016	2.5
GWAS	2016	C	11C032P002	11C032P002	1	4	06.01.2016	3
GWAS	2016	C	11C034P605	11C034P605	1	4	06.01.2016	5
GWAS	2016	C	11C036P601	11C036P601	1	4	06.01.2016	4.5
GWAS	2016	C	11C039P001	11C039P001	1	4	06.01.2016	5
GWAS	2016	C	11C049P006	11C049P006	1	4	06.01.2016	NA
GWAS	2016	C	11C050P001	11C050P001	1	4	06.01.2016	1
GWAS	2016	C	11C051P001	11C051P001	1	4	06.01.2016	2.5
GWAS	2016	C	11C055P004	11C055P004	1	4	06.01.2016	1
GWAS	2016	C	11C057P001	11C057P001	1	4	06.01.2016	1
GWAS	2016	C	11C062P603	11C062P603	1	4	06.01.2016	5
GWAS	2016	C	11C067P001	11C067P001	1	4	06.01.2016	NA
GWAS	2016	C	11C071P601	11C071P601	1	4	06.01.2016	4.5
GWAS	2016	C	11C080P002	11C080P002	1	4	06.01.2016	4
GWAS	2016	C	11C103P001	11C103P001	1	4	06.01.2016	2.5
GWAS	2016	C	11C103P003	11C103P003	1	4	06.01.2016	5
GWAS	2016	C	11C103P005	11C103P005	1	4	06.01.2016	1
GWAS	2016	C	11C105P001	11C105P001	1	4	06.01.2016	5
GWAS	2016	C	11C107P005	11C107P005	1	4	06.01.2016	5
GWAS	2016	C	11C109P002	11C109P002	1	4	06.01.2016	5
GWAS	2016	C	11C109P003	11C109P003	1	4	06.01.2016	3
GWAS	2016	C	11C110P003	11C110P003	1	4	06.01.2016	5
GWAS	2016	C	11C113P006	11C113P006	1	4	06.01.2016	5
GWAS	2016	C	11C115P003	11C115P003	1	4	06.01.2016	3.5
GWAS	2016	C	11C116P001	11C116P001	1	4	06.01.2016	5
GWAS	2016	C	11C129P002	11C129P002	1	4	06.01.2016	1
GWAS	2016	C	11C141P001	11C141P001	1	4	06.01.2016	1
GWAS	2016	C	11C145P001	11C145P001	1	4	06.01.2016	2.5
GWAS	2016	C	11C151P003	11C151P003	1	4	06.01.2016	NA
GWAS	2016	C	11C151P008	11C151P008	1	4	06.01.2016	5
GWAS	2016	C	11C153P002	11C153P002	1	4	06.01.2016	1.5
GWAS	2016	C	11C153P003	11C153P003	1	4	06.01.2016	3.5
GWAS	2016	C	11C154P005	11C154P005	1	4	06.01.2016	4
GWAS	2016	C	11C157P001	11C157P001	1	4	06.01.2016	1
GWAS	2016	C	11C158P001	11C158P001	1	4	06.01.2016	2.5
GWAS	2016	C	11C167P004	11C167P004	1	4	06.01.2016	1
GWAS	2016	C	11C179P003	11C179P003	1	4	06.01.2016	1
GWAS	2016	C	11C180P001	11C180P001	1	4	06.01.2016	2.5
GWAS	2016	C	11C181P002	11C181P002	1	4	06.01.2016	4.5
GWAS	2016	C	11C190P003	11C190P003	1	4	06.01.2016	5
GWAS	2016	C	11C195P003	11C195P003	1	4	06.01.2016	1
GWAS	2016	C	12C001P605	12C001P605	1	4	06.01.2016	2.5
GWAS	2016	C	12C001P614	12C001P614	1	4	06.01.2016	1
GWAS	2016	C	12C002P006	12C002P006	1	4	06.01.2016	5
GWAS	2016	C	12C002P605	12C002P605	1	4	06.01.2016	4
GWAS	2016	C	12C003P610	12C003P610	1	4	06.01.2016	2.5
GWAS	2016	C	12C004P001	12C004P001	1	4	06.01.2016	2.5
GWAS	2016	C	12C004P602	12C004P602	1	4	06.01.2016	1
GWAS	2016	C	12C005P001	12C005P001	1	4	06.01.2016	1
GWAS	2016	C	12C006P001	12C006P001	1	4	06.01.2016	1
GWAS	2016	C	12C006P601	12C006P601	1	4	06.01.2016	1
GWAS	2016	C	12C007P004	12C007P004	1	4	06.01.2016	5
GWAS	2016	C	12C007P601	12C007P601	1	4	06.01.2016	5
GWAS	2016	C	12C008P002	12C008P002	1	4	06.01.2016	1
GWAS	2016	C	12C008P607	12C008P607	1	4	06.01.2016	5
GWAS	2016	C	12C009P002	12C009P002	1	4	06.01.2016	5
GWAS	2016	C	12C009P605	12C009P605	1	4	06.01.2016	1
GWAS	2016	C	12C010P603	12C010P603	1	4	06.01.2016	1
GWAS	2016	C	12C011P003	12C011P003	1	4	06.01.2016	2.5
GWAS	2016	C	12C012P001	12C012P001	1	4	06.01.2016	1.5
GWAS	2016	C	12C013P001	12C013P001	1	4	06.01.2016	1
GWAS	2016	C	12C013P601	12C013P601	1	4	06.01.2016	5
GWAS	2016	C	12C014P001	12C014P001	1	4	06.01.2016	1
GWAS	2016	C	12C017P601	12C017P601	1	4	06.01.2016	5
GWAS	2016	C	12C018P001	12C018P001	1	4	06.01.2016	2.5
GWAS	2016	C	12C018P601	12C018P601	1	4	06.01.2016	5
GWAS	2016	C	12C020P001	12C020P001	1	4	06.01.2016	1
GWAS	2016	C	12C021P001	12C021P001	1	4	06.01.2016	1.5
GWAS	2016	C	12C021P601	12C021P601	1	4	06.01.2016	1
GWAS	2016	C	12C022P602	12C022P602	1	4	06.01.2016	2.5
GWAS	2016	C	12C023P604	12C023P604	1	4	06.01.2016	1
GWAS	2016	C	12C023P605	12C023P605	1	4	06.01.2016	1
GWAS	2016	C	12C024P609	12C024P609	1	4	06.01.2016	1
GWAS	2016	C	12C024P614	12C024P614	1	4	06.01.2016	1
GWAS	2016	C	12C025P604	12C025P604	1	4	06.01.2016	NA
GWAS	2016	C	12C026P604	12C026P604	1	4	06.01.2016	5
GWAS	2016	C	12C028P001	12C028P001	1	4	06.01.2016	1
GWAS	2016	C	12C028P601	12C028P601	1	4	06.01.2016	1
GWAS	2016	C	12C029P001	12C029P001	1	4	06.01.2016	4.5
GWAS	2016	C	12C029P601	12C029P601	1	4	06.01.2016	1
GWAS	2016	C	12C030P601	12C030P601	1	4	06.01.2016	5
GWAS	2016	C	12C031P003	12C031P003	1	4	06.01.2016	2
GWAS	2016	C	12C032P001	12C032P001	1	4	06.01.2016	5
GWAS	2016	C	12C032P603	12C032P603	1	4	06.01.2016	4.5
GWAS	2016	C	12C034P001	12C034P001	1	4	06.01.2016	4
GWAS	2016	C	12C034P601	12C034P601	1	4	06.01.2016	2.5
GWAS	2016	C	12C035P001	12C035P001	1	4	06.01.2016	2
GWAS	2016	C	12C035P601	12C035P601	1	4	06.01.2016	1
GWAS	2016	C	12C036P001	12C036P001	1	4	06.01.2016	5
GWAS	2016	C	12C036P601	12C036P601	1	4	06.01.2016	2.5
GWAS	2016	C	12C037P001	12C037P001	1	4	06.01.2016	1
GWAS	2016	C	12C037P602	12C037P602	1	4	06.01.2016	2
GWAS	2016	C	12C038P001	12C038P001	1	4	06.01.2016	4.5
GWAS	2016	C	12C038P602	12C038P602	1	4	06.01.2016	1
GWAS	2016	C	12C039P601	12C039P601	1	4	06.01.2016	2
GWAS	2016	C	12C040P002	12C040P002	1	4	06.01.2016	1
GWAS	2016	C	12C041P001	12C041P001	1	4	06.01.2016	1
GWAS	2016	C	12C041P601	12C041P601	1	4	06.01.2016	5
GWAS	2016	C	12C042P602	12C042P602	1	4	06.01.2016	3
GWAS	2016	C	12C043P003	12C043P003	1	4	06.01.2016	3
GWAS	2016	C	12C044P002	12C044P002	1	4	06.01.2016	5
GWAS	2016	C	12C046P001	12C046P001	1	4	06.01.2016	5
GWAS	2016	C	12C047P601	12C047P601	1	4	06.01.2016	1.5
GWAS	2016	C	12C048P002	12C048P002	1	4	06.01.2016	1
GWAS	2016	C	12C048P603	12C048P603	1	4	06.01.2016	1
GWAS	2016	C	12C049P001	12C049P001	1	4	06.01.2016	2
GWAS	2016	C	12C049P601	12C049P601	1	4	06.01.2016	5
GWAS	2016	C	12C050P002	12C050P002	1	4	06.01.2016	5
GWAS	2016	C	12C050P603	12C050P603	1	4	06.01.2016	4
GWAS	2016	C	12C052P002	12C052P002	1	4	06.01.2016	5
GWAS	2016	C	12C052P601	12C052P601	1	4	06.01.2016	4
GWAS	2016	C	12C053P601	12C053P601	1	4	06.01.2016	1
GWAS	2016	C	12C054P601	12C054P601	1	4	06.01.2016	5
GWAS	2016	C	12C055P001	12C055P001	1	4	06.01.2016	1
GWAS	2016	C	12C055P601	12C055P601	1	4	06.01.2016	2
GWAS	2016	C	12C056P002	12C056P002	1	4	06.01.2016	2
GWAS	2016	C	12C056P601	12C056P601	1	4	06.01.2016	3
GWAS	2016	C	12C058P601	12C058P601	1	4	06.01.2016	1
GWAS	2016	C	12C059P602	12C059P602	1	4	06.01.2016	1.5
GWAS	2016	C	12C060P602	12C060P602	1	4	06.01.2016	1
GWAS	2016	C	12C061P605	12C061P605	1	4	06.01.2016	4
GWAS	2016	C	12C063P602	12C063P602	1	4	06.01.2016	5
GWAS	2016	C	12C064P001	12C064P001	1	4	06.01.2016	1
GWAS	2016	C	12C065P001	12C065P001	1	4	06.01.2016	NA
GWAS	2016	C	12C065P602	12C065P602	1	4	06.01.2016	2.5
GWAS	2016	C	12C066P001	12C066P001	1	4	06.01.2016	2
GWAS	2016	C	12C066P606	12C066P606	1	4	06.01.2016	3
GWAS	2016	C	12C067P001	12C067P001	1	4	06.01.2016	4
GWAS	2016	C	12C067P601	12C067P601	1	4	06.01.2016	2.5
GWAS	2016	C	12C068P002	12C068P002	1	4	06.01.2016	5
GWAS	2016	C	12C068P601	12C068P601	1	4	06.01.2016	5
GWAS	2016	C	12C069P002	12C069P002	1	4	06.01.2016	2.5
GWAS	2016	C	12C069P607	12C069P607	1	4	06.01.2016	5
GWAS	2016	C	12C070P001	12C070P001	1	4	06.01.2016	1
GWAS	2016	C	12C070P004	12C070P004	1	4	06.01.2016	2.5
GWAS	2016	C	12C070P602	12C070P602	1	4	06.01.2016	1
GWAS	2016	C	12C071P001	12C071P001	1	4	06.01.2016	1
GWAS	2016	C	12C071P602	12C071P602	1	4	06.01.2016	2
GWAS	2016	C	12C072P001	12C072P001	1	4	06.01.2016	1
GWAS	2016	C	12C072P606	12C072P606	1	4	06.01.2016	1
GWAS	2016	C	12C073P001	12C073P001	1	4	06.01.2016	5
GWAS	2016	C	12C073P602	12C073P602	1	4	06.01.2016	4
GWAS	2016	C	12C074P601	12C074P601	1	4	06.01.2016	5
GWAS	2016	C	12C075P001	12C075P001	1	4	06.01.2016	1
GWAS	2016	C	12C075P601	12C075P601	1	4	06.01.2016	5
GWAS	2016	C	12C076P001	12C076P001	1	4	06.01.2016	4.5
GWAS	2016	C	12C077P601	12C077P601	1	4	06.01.2016	5
GWAS	2016	C	12C078P602	12C078P602	1	4	06.01.2016	1
GWAS	2016	C	12C079P001	12C079P001	1	4	06.01.2016	2.5
GWAS	2016	C	12C080P002	12C080P002	1	4	06.01.2016	5
GWAS	2016	C	12C081P001	12C081P001	1	4	06.01.2016	5
GWAS	2016	C	12C082P001	12C082P001	1	4	06.01.2016	3
GWAS	2016	C	12C082P602	12C082P602	1	4	06.01.2016	3
GWAS	2016	C	12C083P003	12C083P003	1	4	06.01.2016	2
GWAS	2016	C	12C083P602	12C083P602	1	4	06.01.2016	5
GWAS	2016	C	12C084P002	12C084P002	1	4	06.01.2016	4
GWAS	2016	C	12C084P606	12C084P606	1	4	06.01.2016	1
GWAS	2016	C	12C085P001	12C085P001	1	4	06.01.2016	5
GWAS	2016	C	12C085P601	12C085P601	1	4	06.01.2016	5
GWAS	2016	C	12C087P602	12C087P602	1	4	06.01.2016	5
GWAS	2016	C	12C088P001	12C088P001	1	4	06.01.2016	1
GWAS	2016	C	12C088P804	12C088P804	1	4	06.01.2016	1
GWAS	2016	C	12C089P002	12C089P002	1	4	06.01.2016	5
GWAS	2016	C	12C089P602	12C089P602	1	4	06.01.2016	2
GWAS	2016	C	12C090P603	12C090P603	1	4	06.01.2016	5
GWAS	2016	C	12C091P001	12C091P001	1	4	06.01.2016	5
GWAS	2016	C	12C091P601	12C091P601	1	4	06.01.2016	3
GWAS	2016	C	12C092P602	12C092P602	1	4	06.01.2016	5
GWAS	2016	C	12C093P604	12C093P604	1	4	06.01.2016	4
GWAS	2016	C	12C094P604	12C094P604	1	4	06.01.2016	2
GWAS	2016	C	12C095P002	12C095P002	1	4	06.01.2016	1
GWAS	2016	C	12C095P602	12C095P602	1	4	06.01.2016	5
GWAS	2016	C	12C096P002	12C096P002	1	4	06.01.2016	5
GWAS	2016	C	12C096P602	12C096P602	1	4	06.01.2016	5
GWAS	2016	C	12C097P003	12C097P003	1	4	06.01.2016	5
GWAS	2016	C	12C097P602	12C097P602	1	4	06.01.2016	3
GWAS	2016	C	12C097P605	12C097P605	1	4	06.01.2016	2
GWAS	2016	C	12C098P001	12C098P001	1	4	06.01.2016	4.5
GWAS	2016	C	12C099P003	12C099P003	1	4	06.01.2016	1
GWAS	2016	C	12C100P002	12C100P002	1	4	06.01.2016	1
GWAS	2016	C	12C104P001	12C104P001	1	4	06.01.2016	4.5
GWAS	2016	C	12C104P004	12C104P004	1	4	06.01.2016	4
GWAS	2016	C	12C104P005	12C104P005	1	4	06.01.2016	5
GWAS	2016	C	12C104P006	12C104P006	1	4	06.01.2016	4.5
GWAS	2016	C	12C104P007	12C104P007	1	4	06.01.2016	5
GWAS	2016	C	12C105P002	12C105P002	1	4	06.01.2016	5
GWAS	2016	C	12C105P004	12C105P004	1	4	06.01.2016	5
GWAS	2016	C	12C105P010	12C105P010	1	4	06.01.2016	5
GWAS	2016	C	12C106P006	12C106P006	1	4	06.01.2016	2
GWAS	2016	C	12C107P001	12C107P001	1	4	06.01.2016	2.5
GWAS	2016	C	12C108P003	12C108P003	1	4	06.01.2016	2
GWAS	2016	C	12C108P004	12C108P004	1	4	06.01.2016	2
GWAS	2016	C	12C109P002	12C109P002	1	4	06.01.2016	2
GWAS	2016	C	12C110P002	12C110P002	1	4	06.01.2016	1
GWAS	2016	C	12C110P004	12C110P004	1	4	06.01.2016	2
GWAS	2016	C	12C111P001	12C111P001	1	4	06.01.2016	5
GWAS	2016	C	12C111P002	12C111P002	1	4	06.01.2016	5
GWAS	2016	C	12C112P004	12C112P004	1	4	06.01.2016	2
GWAS	2016	C	12C112P007	12C112P007	1	4	06.01.2016	3.5
GWAS	2016	C	12C112P008	12C112P008	1	4	06.01.2016	5
GWAS	2016	C	12C113P002	12C113P002	1	4	06.01.2016	3
GWAS	2016	C	12C114P001	12C114P001	1	4	06.01.2016	2.5
GWAS	2016	C	12C115P005	12C115P005	1	4	06.01.2016	1
GWAS	2016	C	12C115P006	12C115P006	1	4	06.01.2016	1
GWAS	2016	C	12C116P001	12C116P001	1	4	06.01.2016	3
GWAS	2016	C	12C117P001	12C117P001	1	4	06.01.2016	5
GWAS	2016	C	12C118P001	12C118P001	1	4	06.01.2016	2.5
GWAS	2016	C	12C118P002	12C118P002	1	4	06.01.2016	2.5
GWAS	2016	C	12C122P001	12C122P001	1	4	06.01.2016	4
GWAS	2016	C	12C124P001	12C124P001	1	4	06.01.2016	1.5
GWAS	2016	C	12C125P003	12C125P003	1	4	06.01.2016	2.5
GWAS	2016	C	12C128P002	12C128P002	1	4	06.01.2016	5
GWAS	2016	C	12C129P002	12C129P002	1	4	06.01.2016	4
GWAS	2016	C	12C130P002	12C130P002	1	4	06.01.2016	3
GWAS	2016	C	12C131P001	12C131P001	1	4	06.01.2016	2.5
GWAS	2016	C	12C132P005	12C132P005	1	4	06.01.2016	5
GWAS	2016	C	12C137P002	12C137P002	1	4	06.01.2016	5
GWAS	2016	C	12C138P001	12C138P001	1	4	06.01.2016	4
GWAS	2016	C	12C140P001	12C140P001	1	4	06.01.2016	5
GWAS	2016	C	12C142P001	12C142P001	1	4	06.01.2016	1
GWAS	2016	C	12C143P001	12C143P001	1	4	06.01.2016	1
GWAS	2016	C	12C145P001	12C145P001	1	4	06.01.2016	2
GWAS	2016	C	12C146P001	12C146P001	1	4	06.01.2016	2
GWAS	2016	C	12C147P002	12C147P002	1	4	06.01.2016	2.5
GWAS	2016	C	12C148P005	12C148P005	1	4	06.01.2016	1
GWAS	2016	C	12C149P002	12C149P002	1	4	06.01.2016	1
GWAS	2016	C	12C151P001	12C151P001	1	4	06.01.2016	3
GWAS	2016	C	12C152P002	12C152P002	1	4	06.01.2016	1
GWAS	2016	C	12C155P001	12C155P001	1	4	06.01.2016	1
GWAS	2016	C	12C159P001	12C159P001	1	4	06.01.2016	NA
GWAS	2016	C	12C160P002	12C160P002	1	4	06.01.2016	2
GWAS	2016	C	12C160P003	12C160P003	1	4	06.01.2016	5
GWAS	2016	C	12C161P003	12C161P003	1	4	06.01.2016	5
GWAS	2016	C	12C162P001	12C162P001	1	4	06.01.2016	5
GWAS	2016	C	12C162P003	12C162P003	1	4	06.01.2016	3.5
GWAS	2016	C	12C166P002	12C166P002	1	4	06.01.2016	2.5
GWAS	2016	C	12C167P002	12C167P002	1	4	06.01.2016	2.5
GWAS	2016	C	12C169P003	12C169P003	1	4	06.01.2016	2.5
GWAS	2016	C	12C169P004	12C169P004	1	4	06.01.2016	2.5
GWAS	2016	C	12C170P001	12C170P001	1	4	06.01.2016	4
GWAS	2016	C	12C171P005	12C171P005	1	4	06.01.2016	5
GWAS	2016	C	12C172P002	12C172P002	1	4	06.01.2016	4
GWAS	2016	C	12C175P001	12C175P001	1	4	06.01.2016	3
GWAS	2016	C	12C176P001	12C176P001	1	4	06.01.2016	3
GWAS	2016	C	12C177P001	12C177P001	1	4	06.01.2016	2.5
GWAS	2016	C	12C178P004	12C178P004	1	4	06.01.2016	3
GWAS	2016	C	12C178P005	12C178P005	1	4	06.01.2016	3
GWAS	2016	C	12C179P001	12C179P001	1	4	06.01.2016	5
GWAS	2016	C	12C180P004	12C180P004	1	4	06.01.2016	2
GWAS	2016	C	12C181P001	12C181P001	1	4	06.01.2016	2
GWAS	2016	C	12C182P005	12C182P005	1	4	06.01.2016	3
GWAS	2016	C	12C183P001	12C183P001	1	4	06.01.2016	1
GWAS	2016	C	12C184P001	12C184P001	1	4	06.01.2016	4
GWAS	2016	C	12C185P001	12C185P001	1	4	06.01.2016	3
GWAS	2016	C	12C186P001	12C186P001	1	4	06.01.2016	1
GWAS	2016	C	12C189P001	12C189P001	1	4	06.01.2016	1
GWAS	2016	C	12C190P003	12C190P003	1	4	06.01.2016	4.5
GWAS	2016	C	12C191P001	12C191P001	1	4	06.01.2016	1
GWAS	2016	C	12C192P001	12C192P001	1	4	06.01.2016	2.5
GWAS	2016	C	12C193P001	12C193P001	1	4	06.01.2016	1
GWAS	2016	C	12C194P001	12C194P001	1	4	06.01.2016	2
GWAS	2016	C	37C020P045	37C020P045	1	4	06.01.2016	1
GWAS	2016	C	39C082P019	39C082P019	1	4	06.01.2016	1
GWAS	2016	C	51S001P001	51S001P001	1	4	06.01.2016	3
GWAS	2016	C	55C023P001	55C023P001	1	4	06.01.2016	2.5
GWAS	2016	C	59C039P001	59C039P001	1	4	06.01.2016	2
GWAS	2016	C	61S016P099	61S016P099	1	4	06.01.2016	2
GWAS	2016	C	61S018P045	61S018P045	1	4	06.01.2016	1
GWAS	2016	C	61S016P006	61S016P006	1	4	06.01.2016	1
GWAS	2016	C	65C065P601	65C065P601	1	4	06.01.2016	1
GWAS	2016	C	69C072P102	69C072P102	1	4	06.01.2016	1
GWAS	2016	C	70C003P117	70C003P117	1	4	06.01.2016	2.5
GWAS	2016	C	70C027P103	70C027P103	1	4	06.01.2016	1
GWAS	2016	C	70C030P101	70C030P101	1	4	06.01.2016	2
GWAS	2016	C	71C098P605	71C098P605	1	4	06.01.2016	2.5
GWAS	2016	C	72C361P105	72C361P105	1	4	06.01.2016	1.5
GWAS	2016	C	75C121P101	75C121P101	1	4	06.01.2016	2
GWAS	2016	C	81C016P604	81C016P604	1	4	06.01.2016	2
GWAS	2016	C	83C076P001	83C076P001	1	4	06.01.2016	1
GWAS	2016	C	85C093P003	85C093P003	1	4	06.01.2016	1
GWAS	2016	C	86C065P202	86C065P202	1	4	06.01.2016	4.5
GWAS	2016	C	86C169P001	86C169P001	1	4	06.01.2016	5
GWAS	2016	C	88C031P003	88C031P003	1	4	06.01.2016	1
GWAS	2016	C	88C118P603	88C118P603	1	4	06.01.2016	3
GWAS	2016	C	88C270P001	88C270P001	1	4	06.01.2016	5
GWAS	2016	C	89C029P623	89C029P623	1	4	06.01.2016	5
GWAS	2016	C	89C206P002	89C206P002	1	4	06.01.2016	NA
GWAS	2016	C	89C208P012	89C208P012	1	4	06.01.2016	1
GWAS	2016	C	89C230P007	89C230P007	1	4	06.01.2016	5
GWAS	2016	C	90C253P003	90C253P003	1	4	06.01.2016	2.5
GWAS	2016	C	91C326P001	91C326P001	1	4	06.01.2016	5
GWAS	2016	C	91C326P003	91C326P003	1	4	06.01.2016	2.5
GWAS	2016	C	92C063P002	92C063P002	1	4	06.01.2016	5
GWAS	2016	C	92C245P002	92C245P002	1	4	06.01.2016	1
GWAS	2016	C	93C060P002	93C060P002	1	4	06.01.2016	5
GWAS	2016	C	94C016P001	94C016P001	1	4	06.01.2016	5
GWAS	2016	C	95C179P002	95C179P002	1	4	06.01.2016	1
GWAS	2016	C	95C197P001	95C197P001	1	4	06.01.2016	1
GWAS	2016	C	95C197P003	95C197P003	1	4	06.01.2016	1
GWAS	2016	C	97C079P014	97C079P014	1	4	06.01.2016	5
GWAS	2016	C	97C085P006	97C085P006	1	4	06.01.2016	1
GWAS	2016	C	97C086P001	97C086P001	1	4	06.01.2016	1
GWAS	2016	C	97C111P005	97C111P005	1	4	06.01.2016	5
GWAS	2016	C	97C156P002	97C156P002	1	4	06.01.2016	2.5
GWAS	2016	C	97C192P001	97C192P001	1	4	06.01.2016	1
GWAS	2016	C	97C209P001	97C209P001	1	4	06.01.2016	1
GWAS	2016	C	98C152P008	98C152P008	1	4	06.01.2016	1
GWAS	2016	C	98C153P003	98C153P003	1	4	06.01.2016	5
GWAS	2016	C	99C088P007	99C088P007	1	4	06.01.2016	3
GWAS	2016	C	63C125P039	Aiko	1	4	06.01.2016	1
GWAS	2016	C	97C117P003	Albion	1	4	06.01.2016	NA
GWAS	2016	C	97C117P003	Albion	1	4	06.01.2016	NA
GWAS	2016	C	97C117P003	Albion	1	4	06.01.2016	NA
GWAS	2016	C	97C117P003	Albion	1	4	06.01.2016	5
GWAS	2016	C	97C117P003	Albion	1	4	06.01.2016	5
GWAS	2016	C	97C117P003	Albion	1	4	06.01.2016	3
GWAS	2016	C	56S115P011	Aliso	1	4	06.01.2016	3.5
GWAS	2016	C	88C066P610	Anaheim	1	4	06.01.2016	3
GWAS	2016	C	91C248P003	Aromas	1	4	06.01.2016	5
GWAS	2016	C	04C039P001	Benicia	1	4	06.01.2016	3.5
GWAS	2016	C	72C271P105	Brighton	1	4	06.01.2016	NA
GWAS	2016	C	65CA1501	CA_1501	1	4	06.01.2016	5
GWAS	2016	C	08C181P001	Cabrillo	1	4	06.01.2016	2.5
GWAS	2016	C	88C029P603	Camarosa	1	4	06.01.2016	3.5
GWAS	2016	C	94C003P011	Camino_Real	1	4	06.01.2016	2.5
GWAS	2016	C	83C093P006	Capitola	1	4	06.01.2016	2
GWAS	2016	C	88C070P613	Carlsbad	1	4	06.01.2016	5
GWAS	2016	C	77C032P103	Chandler	1	4	06.01.2016	5
GWAS	2016	C	65C272P104	Cruz	1	4	06.01.2016	1
GWAS	2016	C	91C248P006	Diamante	1	4	06.01.2016	1
GWAS	2016	C	36C039P004	Donner	1	4	06.01.2016	2.5
GWAS	2016	C	70C003P108	Douglas	1	4	06.01.2016	5
GWAS	2016	C	PI551394	Earliglow	1	4	06.01.2016	1
GWAS	2016	C	53C009P010	Fresno	1	4	06.01.2016	1
GWAS	2016	C	08C132P608	Fronteras	1	4	06.01.2016	1
GWAS	2016	C	08C132P608	Fronteras	1	4	06.01.2016	1
GWAS	2016	C	08C132P608	Fronteras	1	4	06.01.2016	1
GWAS	2016	C	08C132P608	Fronteras	1	4	06.01.2016	1
GWAS	2016	C	08C132P608	Fronteras	1	4	06.01.2016	1
GWAS	2016	C	08C132P608	Fronteras	1	4	06.01.2016	1
GWAS	2016	C	91C248P002	Gaviota	1	4	06.01.2016	5
GWAS	2016	C	08C055P002	Grenada	1	4	06.01.2016	5
GWAS	2016	C	PI551407	Guardian	1	4	06.01.2016	1
GWAS	2016	C	69C141P101	Hecker	1	4	06.01.2016	2.5
GWAS	2016	C	82C014P603	Irvine	1	4	06.01.2016	4
GWAS	2016	C	88C066P616	Laguna	1	4	06.01.2016	3
GWAS	2016	C	36C003P001	Lassen	1	4	06.01.2016	5
GWAS	2016	C	07C132P003	Merced	1	4	06.01.2016	5
GWAS	2016	C	04C044P603	Mojave	1	4	06.01.2016	3
GWAS	2016	C	01C132P003	Monterey	1	4	06.01.2016	3.5
GWAS	2016	C	75C071P105	Muir	1	4	06.01.2016	2
GWAS	2016	C	81C043P603	Oso_Grande	1	4	06.01.2016	1
GWAS	2016	C	91C324P001	Pacific	1	4	06.01.2016	4
GWAS	2016	C	71C101P611	Pajaro	1	4	06.01.2016	5
GWAS	2016	C	00C259P002	Palomar	1	4	06.01.2016	2
GWAS	2016	C	77C030P605	Parker	1	4	06.01.2016	4
GWAS	2016	C	08C020P602	Petaluma	1	4	06.01.2016	5
GWAS	2016	C	01C206P005	Portola	1	4	06.01.2016	1
GWAS	2016	C	01C139P002	San_Andreas	1	4	06.01.2016	2
GWAS	2016	C	83C049P001	Seascape	1	4	06.01.2016	NA
GWAS	2016	C	75C071P107	Selva	1	4	06.01.2016	3
GWAS	2016	C	56C124P012	Sequoia	1	4	06.01.2016	2.5
GWAS	2016	C	35C035P008	Shasta	1	4	06.01.2016	5
GWAS	2016	C	35C093P011	Solana	1	4	06.01.2016	1
GWAS	2016	C	72C330P107	Soquel	1	4	06.01.2016	1
GWAS	2016	C	53C009P002	Tioga	1	4	06.01.2016	1
GWAS	2016	C	63C120P001	Tufts	1	4	06.01.2016	2
GWAS	2016	C	96C042P601	Ventana	1	4	06.01.2016	1
GWAS	2016	C	52C016P007	Wiltguard	1	4	06.01.2016	1
GWAS	2016	D	00C003P602	00C003P602	1	4	06.01.2016	1
GWAS	2016	D	00C018P601	00C018P601	1	4	06.01.2016	5
GWAS	2016	D	00C027P601	00C027P601	1	4	06.01.2016	5
GWAS	2016	D	00C038P606	00C038P606	1	4	06.01.2016	1
GWAS	2016	D	00C046P601	00C046P601	1	4	06.01.2016	3
GWAS	2016	D	00C057P613	00C057P613	1	4	06.01.2016	1
GWAS	2016	D	00C139P003	00C139P003	1	4	06.01.2016	3.5
GWAS	2016	D	01C053P602	01C053P602	1	4	06.01.2016	2
GWAS	2016	D	01C057P601	01C057P601	1	4	06.01.2016	1.5
GWAS	2016	D	01C080P602	01C080P602	1	4	06.01.2016	2.5
GWAS	2016	D	01C111P004	01C111P004	1	4	06.01.2016	2
GWAS	2016	D	01C134P001	01C134P001	1	4	06.01.2016	2.5
GWAS	2016	D	01C134P003	01C134P003	1	4	06.01.2016	5
GWAS	2016	D	01C136P001	01C136P001	1	4	06.01.2016	1
GWAS	2016	D	01C138P001	01C138P001	1	4	06.01.2016	3
GWAS	2016	D	01C141P002	01C141P002	1	4	06.01.2016	1
GWAS	2016	D	01C158P001	01C158P001	1	4	06.01.2016	1
GWAS	2016	D	01C203P006	01C203P006	1	4	06.01.2016	1
GWAS	2016	D	02C068P608	02C068P608	1	4	06.01.2016	4.5
GWAS	2016	D	02C093P006	02C093P006	1	4	06.01.2016	3
GWAS	2016	D	02C095P004	02C095P004	1	4	06.01.2016	5
GWAS	2016	D	02C103P002	02C103P002	1	4	06.01.2016	1.5
GWAS	2016	D	02C132P006	02C132P006	1	4	06.01.2016	3
GWAS	2016	D	02C134P003	02C134P003	1	4	06.01.2016	5
GWAS	2016	D	02C143P003	02C143P003	1	4	06.01.2016	4
GWAS	2016	D	02C144P003	02C144P003	1	4	06.01.2016	2.5
GWAS	2016	D	02C156P003	02C156P003	1	4	06.01.2016	1
GWAS	2016	D	02C229P001	02C229P001	1	4	06.01.2016	3
GWAS	2016	D	02C230P001	02C230P001	1	4	06.01.2016	1
GWAS	2016	D	03C001P606	03C001P606	1	4	06.01.2016	1
GWAS	2016	D	03C065P601	03C065P601	1	4	06.01.2016	1
GWAS	2016	D	03C075P601	03C075P601	1	4	06.01.2016	5
GWAS	2016	D	03C092P008	03C092P008	1	4	06.01.2016	1
GWAS	2016	D	03C102P002	03C102P002	1	4	06.01.2016	1
GWAS	2016	D	03C111P005	03C111P005	1	4	06.01.2016	5
GWAS	2016	D	03C114P003	03C114P003	1	4	06.01.2016	5
GWAS	2016	D	03C132P003	03C132P003	1	4	06.01.2016	5
GWAS	2016	D	03C149P008	03C149P008	1	4	06.01.2016	2.5
GWAS	2016	D	04C001P601	04C001P601	1	4	06.01.2016	5
GWAS	2016	D	04C009P005	04C009P005	1	4	06.01.2016	2.5
GWAS	2016	D	04C013P604	04C013P604	1	4	06.01.2016	3
GWAS	2016	D	04C018P004	04C018P004	1	4	06.01.2016	1
GWAS	2016	D	04C020P604	04C020P604	1	4	06.01.2016	3
GWAS	2016	D	04C038P603	04C038P603	1	4	06.01.2016	1
GWAS	2016	D	04C041P006	04C041P006	1	4	06.01.2016	1
GWAS	2016	D	04C041P007	04C041P007	1	4	06.01.2016	1
GWAS	2016	D	04C045P605	04C045P605	1	4	06.01.2016	5
GWAS	2016	D	04C053P001	04C053P001	1	4	06.01.2016	3
GWAS	2016	D	04C056P608	04C056P608	1	4	06.01.2016	5
GWAS	2016	D	04C073P002	04C073P002	1	4	06.01.2016	3
GWAS	2016	D	04C076P004	04C076P004	1	4	06.01.2016	1
GWAS	2016	D	04C077P002	04C077P002	1	4	06.01.2016	1
GWAS	2016	D	04C085P601	04C085P601	1	4	06.01.2016	1
GWAS	2016	D	05C027P605	05C027P605	1	4	06.01.2016	5
GWAS	2016	D	05C054P611	05C054P611	1	4	06.01.2016	2.5
GWAS	2016	D	05C065P608	05C065P608	1	4	06.01.2016	2.5
GWAS	2016	D	05C092P011	05C092P011	1	4	06.01.2016	4
GWAS	2016	D	05C095P004	05C095P004	1	4	06.01.2016	3
GWAS	2016	D	05C097P007	05C097P007	1	4	06.01.2016	4.5
GWAS	2016	D	05C099P006	05C099P006	1	4	06.01.2016	3
GWAS	2016	D	05C106P002	05C106P002	1	4	06.01.2016	4.5
GWAS	2016	D	05C107P002	05C107P002	1	4	06.01.2016	5
GWAS	2016	D	05C108P007	05C108P007	1	4	06.01.2016	2.5
GWAS	2016	D	05C109P002	05C109P002	1	4	06.01.2016	2.5
GWAS	2016	D	05C115P005	05C115P005	1	4	06.01.2016	1
GWAS	2016	D	05C117P005	05C117P005	1	4	06.01.2016	1
GWAS	2016	D	05C120P009	05C120P009	1	4	06.01.2016	3
GWAS	2016	D	05C132P001	05C132P001	1	4	06.01.2016	4
GWAS	2016	D	05C144P003	05C144P003	1	4	06.01.2016	1
GWAS	2016	D	05C148P002	05C148P002	1	4	06.01.2016	1
GWAS	2016	D	05C154P002	05C154P002	1	4	06.01.2016	5
GWAS	2016	D	05C165P001	05C165P001	1	4	06.01.2016	4
GWAS	2016	D	05C172P002	05C172P002	1	4	06.01.2016	2.5
GWAS	2016	D	05C194P001	05C194P001	1	4	06.01.2016	5
GWAS	2016	D	05C197P002	05C197P002	1	4	06.01.2016	1
GWAS	2016	D	05C199P010	05C199P010	1	4	06.01.2016	5
GWAS	2016	D	05C205P002	05C205P002	1	4	06.01.2016	2
GWAS	2016	D	05C206P005	05C206P005	1	4	06.01.2016	3
GWAS	2016	D	06C016P602	06C016P602	1	4	06.01.2016	3
GWAS	2016	D	06C020P605	06C020P605	1	4	06.01.2016	NA
GWAS	2016	D	06C043P603	06C043P603	1	4	06.01.2016	5
GWAS	2016	D	06C050P611	06C050P611	1	4	06.01.2016	2.5
GWAS	2016	D	06C051P609	06C051P609	1	4	06.01.2016	3
GWAS	2016	D	06C066P603	06C066P603	1	4	06.01.2016	5
GWAS	2016	D	06C090P605	06C090P605	1	4	06.01.2016	2.5
GWAS	2016	D	06C102P002	06C102P002	1	4	06.01.2016	4.5
GWAS	2016	D	06C106P002	06C106P002	1	4	06.01.2016	NA
GWAS	2016	D	06C109P003	06C109P003	1	4	06.01.2016	4
GWAS	2016	D	06C110P004	06C110P004	1	4	06.01.2016	1
GWAS	2016	D	06C111P001	06C111P001	1	4	06.01.2016	2.5
GWAS	2016	D	06C132P001	06C132P001	1	4	06.01.2016	3.5
GWAS	2016	D	06C132P002	06C132P002	1	4	06.01.2016	2
GWAS	2016	D	06C137P002	06C137P002	1	4	06.01.2016	5
GWAS	2016	D	06C202P001	06C202P001	1	4	06.01.2016	5
GWAS	2016	D	06C204P001	06C204P001	1	4	06.01.2016	1
GWAS	2016	D	07C001P608	07C001P608	1	4	06.01.2016	1
GWAS	2016	D	07C009P601	07C009P601	1	4	06.01.2016	5
GWAS	2016	D	07C043P001	07C043P001	1	4	06.01.2016	2
GWAS	2016	D	07C049P003	07C049P003	1	4	06.01.2016	1
GWAS	2016	D	07C050P601	07C050P601	1	4	06.01.2016	1
GWAS	2016	D	07C064P002	07C064P002	1	4	06.01.2016	4
GWAS	2016	D	07C064P003	07C064P003	1	4	06.01.2016	1
GWAS	2016	D	07C064P005	07C064P005	1	4	06.01.2016	2.5
GWAS	2016	D	07C067P608	07C067P608	1	4	06.01.2016	2.5
GWAS	2016	D	07C090P606	07C090P606	1	4	06.01.2016	2.5
GWAS	2016	D	07C092P003	07C092P003	1	4	06.01.2016	1.5
GWAS	2016	D	07C119P001	07C119P001	1	4	06.01.2016	1
GWAS	2016	D	07C120P003	07C120P003	1	4	06.01.2016	1
GWAS	2016	D	07C134P001	07C134P001	1	4	06.01.2016	1
GWAS	2016	D	07C141P001	07C141P001	1	4	06.01.2016	5
GWAS	2016	D	07C148P001	07C148P001	1	4	06.01.2016	1
GWAS	2016	D	07C148P003	07C148P003	1	4	06.01.2016	1
GWAS	2016	D	07C203P001	07C203P001	1	4	06.01.2016	3
GWAS	2016	D	07C216P001	07C216P001	1	4	06.01.2016	1
GWAS	2016	D	08C005P601	08C005P601	1	4	06.01.2016	2.5
GWAS	2016	D	08C013P605	08C013P605	1	4	06.01.2016	5
GWAS	2016	D	08C013P606	08C013P606	1	4	06.01.2016	1
GWAS	2016	D	08C017P005	08C017P005	1	4	06.01.2016	4.5
GWAS	2016	D	08C018P005	08C018P005	1	4	06.01.2016	1
GWAS	2016	D	08C037P603	08C037P603	1	4	06.01.2016	1
GWAS	2016	D	08C043P001	08C043P001	1	4	06.01.2016	5
GWAS	2016	D	08C043P004	08C043P004	1	4	06.01.2016	5
GWAS	2016	D	08C043P010	08C043P010	1	4	06.01.2016	1
GWAS	2016	D	08C075P001	08C075P001	1	4	06.01.2016	NA
GWAS	2016	D	08C114P005	08C114P005	1	4	06.01.2016	3
GWAS	2016	D	08C123P001	08C123P001	1	4	06.01.2016	4
GWAS	2016	D	08C124P001	08C124P001	1	4	06.01.2016	2.5
GWAS	2016	D	08C128P002	08C128P002	1	4	06.01.2016	1
GWAS	2016	D	08C129P004	08C129P004	1	4	06.01.2016	3
GWAS	2016	D	08C131P003	08C131P003	1	4	06.01.2016	1
GWAS	2016	D	08C132P003	08C132P003	1	4	06.01.2016	3.5
GWAS	2016	D	08C135P004	08C135P004	1	4	06.01.2016	4
GWAS	2016	D	08C137P001	08C137P001	1	4	06.01.2016	5
GWAS	2016	D	08C137P002	08C137P002	1	4	06.01.2016	5
GWAS	2016	D	08C138P003	08C138P003	1	4	06.01.2016	1
GWAS	2016	D	08C150P009	08C150P009	1	4	06.01.2016	5
GWAS	2016	D	08C182P002	08C182P002	1	4	06.01.2016	5
GWAS	2016	D	09C012P605	09C012P605	1	4	06.01.2016	5
GWAS	2016	D	09C016P601	09C016P601	1	4	06.01.2016	1
GWAS	2016	D	09C020P609	09C020P609	1	4	06.01.2016	1
GWAS	2016	D	09C032P605	09C032P605	1	4	06.01.2016	5
GWAS	2016	D	09C037P001	09C037P001	1	4	06.01.2016	2.5
GWAS	2016	D	09C048P003	09C048P003	1	4	06.01.2016	1
GWAS	2016	D	09C056P608	09C056P608	1	4	06.01.2016	5
GWAS	2016	D	09C061P602	09C061P602	1	4	06.01.2016	1
GWAS	2016	D	09C061P606	09C061P606	1	4	06.01.2016	1
GWAS	2016	D	09C062P001	09C062P001	1	4	06.01.2016	1
GWAS	2016	D	09C068P602	09C068P602	1	4	06.01.2016	5
GWAS	2016	D	09C078P603	09C078P603	1	4	06.01.2016	5
GWAS	2016	D	09C085P002	09C085P002	1	4	06.01.2016	2
GWAS	2016	D	09C085P601	09C085P601	1	4	06.01.2016	4
GWAS	2016	D	09C088P602	09C088P602	1	4	06.01.2016	1
GWAS	2016	D	09C091P001	09C091P001	1	4	06.01.2016	1
GWAS	2016	D	09C097P003	09C097P003	1	4	06.01.2016	1
GWAS	2016	D	09C100P003	09C100P003	1	4	06.01.2016	3
GWAS	2016	D	09C103P002	09C103P002	1	4	06.01.2016	4
GWAS	2016	D	09C108P002	09C108P002	1	4	06.01.2016	4
GWAS	2016	D	09C132P003	09C132P003	1	4	06.01.2016	1
GWAS	2016	D	09C141P001	09C141P001	1	4	06.01.2016	1
GWAS	2016	D	09C154P605	09C154P605	1	4	06.01.2016	5
GWAS	2016	D	09C166P007	09C166P007	1	4	06.01.2016	5
GWAS	2016	D	09C171P602	09C171P602	1	4	06.01.2016	5
GWAS	2016	D	09C180P001	09C180P001	1	4	06.01.2016	3
GWAS	2016	D	10C001P604	10C001P604	1	4	06.01.2016	5
GWAS	2016	D	10C005P602	10C005P602	1	4	06.01.2016	1
GWAS	2016	D	10C007P003	10C007P003	1	4	06.01.2016	1
GWAS	2016	D	10C012P003	10C012P003	1	4	06.01.2016	4.5
GWAS	2016	D	10C015P605	10C015P605	1	4	06.01.2016	1
GWAS	2016	D	10C017P001	10C017P001	1	4	06.01.2016	1
GWAS	2016	D	10C017P002	10C017P002	1	4	06.01.2016	1
GWAS	2016	D	10C023P001	10C023P001	1	4	06.01.2016	5
GWAS	2016	D	10C024P002	10C024P002	1	4	06.01.2016	5
GWAS	2016	D	10C025P601	10C025P601	1	4	06.01.2016	5
GWAS	2016	D	10C030P001	10C030P001	1	4	06.01.2016	3
GWAS	2016	D	10C031P602	10C031P602	1	4	06.01.2016	5
GWAS	2016	D	10C037P604	10C037P604	1	4	06.01.2016	5
GWAS	2016	D	10C038P601	10C038P601	1	4	06.01.2016	2
GWAS	2016	D	10C070P611	10C070P611	1	4	06.01.2016	5
GWAS	2016	D	10C077P601	10C077P601	1	4	06.01.2016	4.5
GWAS	2016	D	10C078P603	10C078P603	1	4	06.01.2016	5
GWAS	2016	D	10C080P605	10C080P605	1	4	06.01.2016	5
GWAS	2016	D	10C081P001	10C081P001	1	4	06.01.2016	5
GWAS	2016	D	10C087P002	10C087P002	1	4	06.01.2016	5
GWAS	2016	D	10C099P001	10C099P001	1	4	06.01.2016	2.5
GWAS	2016	D	10C105P001	10C105P001	1	4	06.01.2016	1
GWAS	2016	D	10C106P001	10C106P001	1	4	06.01.2016	1
GWAS	2016	D	10C106P008	10C106P008	1	4	06.01.2016	3
GWAS	2016	D	10C116P001	10C116P001	1	4	06.01.2016	3
GWAS	2016	D	10C122P003	10C122P003	1	4	06.01.2016	2
GWAS	2016	D	10C122P006	10C122P006	1	4	06.01.2016	1.5
GWAS	2016	D	10C124P002	10C124P002	1	4	06.01.2016	5
GWAS	2016	D	10C126P003	10C126P003	1	4	06.01.2016	3
GWAS	2016	D	10C127P001	10C127P001	1	4	06.01.2016	2.5
GWAS	2016	D	10C134P004	10C134P004	1	4	06.01.2016	3.5
GWAS	2016	D	10C136P004	10C136P004	1	4	06.01.2016	2.5
GWAS	2016	D	10C137P005	10C137P005	1	4	06.01.2016	4.5
GWAS	2016	D	10C140P001	10C140P001	1	4	06.01.2016	4.5
GWAS	2016	D	10C141P001	10C141P001	1	4	06.01.2016	2.5
GWAS	2016	D	10C143P001	10C143P001	1	4	06.01.2016	3
GWAS	2016	D	10C144P001	10C144P001	1	4	06.01.2016	1
GWAS	2016	D	10C144P002	10C144P002	1	4	06.01.2016	1
GWAS	2016	D	10C144P003	10C144P003	1	4	06.01.2016	2.5
GWAS	2016	D	10C160P001	10C160P001	1	4	06.01.2016	1
GWAS	2016	D	10C160P009	10C160P009	1	4	06.01.2016	3.5
GWAS	2016	D	10C169P001	10C169P001	1	4	06.01.2016	5
GWAS	2016	D	10C187P004	10C187P004	1	4	06.01.2016	1.5
GWAS	2016	D	11C021P001	11C021P001	1	4	06.01.2016	1
GWAS	2016	D	11C032P002	11C032P002	1	4	06.01.2016	5
GWAS	2016	D	11C034P605	11C034P605	1	4	06.01.2016	5
GWAS	2016	D	11C036P601	11C036P601	1	4	06.01.2016	2.5
GWAS	2016	D	11C039P001	11C039P001	1	4	06.01.2016	NA
GWAS	2016	D	11C049P006	11C049P006	1	4	06.01.2016	5
GWAS	2016	D	11C050P001	11C050P001	1	4	06.01.2016	1
GWAS	2016	D	11C051P001	11C051P001	1	4	06.01.2016	3
GWAS	2016	D	11C055P004	11C055P004	1	4	06.01.2016	1
GWAS	2016	D	11C057P001	11C057P001	1	4	06.01.2016	1
GWAS	2016	D	11C062P603	11C062P603	1	4	06.01.2016	3
GWAS	2016	D	11C067P001	11C067P001	1	4	06.01.2016	5
GWAS	2016	D	11C071P601	11C071P601	1	4	06.01.2016	5
GWAS	2016	D	11C080P002	11C080P002	1	4	06.01.2016	4
GWAS	2016	D	11C103P001	11C103P001	1	4	06.01.2016	2.5
GWAS	2016	D	11C103P003	11C103P003	1	4	06.01.2016	2.5
GWAS	2016	D	11C103P005	11C103P005	1	4	06.01.2016	1
GWAS	2016	D	11C105P001	11C105P001	1	4	06.01.2016	5
GWAS	2016	D	11C107P005	11C107P005	1	4	06.01.2016	5
GWAS	2016	D	11C109P002	11C109P002	1	4	06.01.2016	4
GWAS	2016	D	11C109P003	11C109P003	1	4	06.01.2016	NA
GWAS	2016	D	11C110P003	11C110P003	1	4	06.01.2016	5
GWAS	2016	D	11C113P006	11C113P006	1	4	06.01.2016	3
GWAS	2016	D	11C115P003	11C115P003	1	4	06.01.2016	4
GWAS	2016	D	11C116P001	11C116P001	1	4	06.01.2016	2.5
GWAS	2016	D	11C129P002	11C129P002	1	4	06.01.2016	1
GWAS	2016	D	11C141P001	11C141P001	1	4	06.01.2016	1
GWAS	2016	D	11C145P001	11C145P001	1	4	06.01.2016	1
GWAS	2016	D	11C151P003	11C151P003	1	4	06.01.2016	3
GWAS	2016	D	11C151P008	11C151P008	1	4	06.01.2016	3.5
GWAS	2016	D	11C153P002	11C153P002	1	4	06.01.2016	1
GWAS	2016	D	11C153P003	11C153P003	1	4	06.01.2016	2.5
GWAS	2016	D	11C154P005	11C154P005	1	4	06.01.2016	2.5
GWAS	2016	D	11C157P001	11C157P001	1	4	06.01.2016	1
GWAS	2016	D	11C158P001	11C158P001	1	4	06.01.2016	5
GWAS	2016	D	11C167P004	11C167P004	1	4	06.01.2016	1
GWAS	2016	D	11C179P003	11C179P003	1	4	06.01.2016	1
GWAS	2016	D	11C180P001	11C180P001	1	4	06.01.2016	2.5
GWAS	2016	D	11C181P002	11C181P002	1	4	06.01.2016	5
GWAS	2016	D	11C190P003	11C190P003	1	4	06.01.2016	5
GWAS	2016	D	11C195P003	11C195P003	1	4	06.01.2016	1
GWAS	2016	D	12C001P605	12C001P605	1	4	06.01.2016	3.5
GWAS	2016	D	12C001P614	12C001P614	1	4	06.01.2016	1
GWAS	2016	D	12C002P006	12C002P006	1	4	06.01.2016	3
GWAS	2016	D	12C002P605	12C002P605	1	4	06.01.2016	2
GWAS	2016	D	12C003P610	12C003P610	1	4	06.01.2016	5
GWAS	2016	D	12C004P001	12C004P001	1	4	06.01.2016	2.5
GWAS	2016	D	12C004P602	12C004P602	1	4	06.01.2016	1
GWAS	2016	D	12C005P001	12C005P001	1	4	06.01.2016	1
GWAS	2016	D	12C006P001	12C006P001	1	4	06.01.2016	1
GWAS	2016	D	12C006P601	12C006P601	1	4	06.01.2016	1
GWAS	2016	D	12C007P004	12C007P004	1	4	06.01.2016	5
GWAS	2016	D	12C007P601	12C007P601	1	4	06.01.2016	5
GWAS	2016	D	12C008P002	12C008P002	1	4	06.01.2016	1
GWAS	2016	D	12C008P607	12C008P607	1	4	06.01.2016	5
GWAS	2016	D	12C009P002	12C009P002	1	4	06.01.2016	3.5
GWAS	2016	D	12C009P605	12C009P605	1	4	06.01.2016	1
GWAS	2016	D	12C010P603	12C010P603	1	4	06.01.2016	1
GWAS	2016	D	12C011P003	12C011P003	1	4	06.01.2016	5
GWAS	2016	D	12C012P001	12C012P001	1	4	06.01.2016	1
GWAS	2016	D	12C013P001	12C013P001	1	4	06.01.2016	1
GWAS	2016	D	12C013P601	12C013P601	1	4	06.01.2016	4
GWAS	2016	D	12C014P001	12C014P001	1	4	06.01.2016	1
GWAS	2016	D	12C017P601	12C017P601	1	4	06.01.2016	5
GWAS	2016	D	12C018P001	12C018P001	1	4	06.01.2016	2.5
GWAS	2016	D	12C018P601	12C018P601	1	4	06.01.2016	4
GWAS	2016	D	12C020P001	12C020P001	1	4	06.01.2016	1
GWAS	2016	D	12C021P001	12C021P001	1	4	06.01.2016	1
[truncated: 26,321 more rows]

## Sheet: Portola S1
Set	Year	Replication	Accession Number	Alias	Timepoint	Weeks Post-Inoculation	Date	Score
Portola S1	2017	A	01C206P005	Portola	1	26	05.09.2017	NA
Portola S1	2017	A	16S408P002	16S408P002	1	26	05.09.2017	1
Portola S1	2017	A	16S408P015	16S408P015	1	26	05.09.2017	2
Portola S1	2017	A	16S408P023	16S408P023	1	26	05.09.2017	1
Portola S1	2017	A	16S408P025	16S408P025	1	26	05.09.2017	1
Portola S1	2017	A	16S408P029	16S408P029	1	26	05.09.2017	1
Portola S1	2017	A	16S408P030	16S408P030	1	26	05.09.2017	1.5
Portola S1	2017	A	16S408P031	16S408P031	1	26	05.09.2017	1
Portola S1	2017	A	16S408P033	16S408P033	1	26	05.09.2017	1
Portola S1	2017	A	16S408P038	16S408P038	1	26	05.09.2017	1
Portola S1	2017	A	16S408P040	16S408P040	1	26	05.09.2017	1
Portola S1	2017	A	16S408P043	16S408P043	1	26	05.09.2017	1
Portola S1	2017	A	16S408P055	16S408P055	1	26	05.09.2017	1
Portola S1	2017	A	16S408P068	16S408P068	1	26	05.09.2017	2.5
Portola S1	2017	A	16S408P072	16S408P072	1	26	05.09.2017	1
Portola S1	2017	A	16S408P075	16S408P075	1	26	05.09.2017	1
Portola S1	2017	A	16S408P077	16S408P077	1	26	05.09.2017	1
Portola S1	2017	A	16S408P078	16S408P078	1	26	05.09.2017	1
Portola S1	2017	A	16S408P081	16S408P081	1	26	05.09.2017	1
Portola S1	2017	A	16S408P082	16S408P082	1	26	05.09.2017	1
Portola S1	2017	A	16S408P089	16S408P089	1	26	05.09.2017	1
Portola S1	2017	A	16S408P099	16S408P099	1	26	05.09.2017	1
Portola S1	2017	A	16S408P103	16S408P103	1	26	05.09.2017	1
Portola S1	2017	A	16S408P105	16S408P105	1	26	05.09.2017	1
Portola S1	2017	A	16S408P107	16S408P107	1	26	05.09.2017	NA
Portola S1	2017	A	16S408P108	16S408P108	1	26	05.09.2017	1
Portola S1	2017	A	16S408P110	16S408P110	1	26	05.09.2017	1
Portola S1	2017	A	97C093P007	97C093P007	1	26	05.09.2017	1
Portola S1	2017	A	97C209P001	97C209P001	1	26	05.09.2017	1
Portola S1	2017	A	01C206P005	Portola	2	28	05.23.2017	NA
Portola S1	2017	A	16S408P002	16S408P002	2	28	05.23.2017	1
Portola S1	2017	A	16S408P015	16S408P015	2	28	05.23.2017	2
Portola S1	2017	A	16S408P023	16S408P023	2	28	05.23.2017	1
Portola S1	2017	A	16S408P025	16S408P025	2	28	05.23.2017	1
Portola S1	2017	A	16S408P029	16S408P029	2	28	05.23.2017	1
Portola S1	2017	A	16S408P030	16S408P030	2	28	05.23.2017	1.5
Portola S1	2017	A	16S408P031	16S408P031	2	28	05.23.2017	1
Portola S1	2017	A	16S408P033	16S408P033	2	28	05.23.2017	1
Portola S1	2017	A	16S408P038	16S408P038	2	28	05.23.2017	1
Portola S1	2017	A	16S408P040	16S408P040	2	28	05.23.2017	1
Portola S1	2017	A	16S408P043	16S408P043	2	28	05.23.2017	1
Portola S1	2017	A	16S408P055	16S408P055	2	28	05.23.2017	1
Portola S1	2017	A	16S408P068	16S408P068	2	28	05.23.2017	2.5
Portola S1	2017	A	16S408P072	16S408P072	2	28	05.23.2017	1
Portola S1	2017	A	16S408P075	16S408P075	2	28	05.23.2017	1
Portola S1	2017	A	16S408P077	16S408P077	2	28	05.23.2017	1
Portola S1	2017	A	16S408P078	16S408P078	2	28	05.23.2017	1
Portola S1	2017	A	16S408P081	16S408P081	2	28	05.23.2017	1
Portola S1	2017	A	16S408P082	16S408P082	2	28	05.23.2017	1
Portola S1	2017	A	16S408P089	16S408P089	2	28	05.23.2017	1
Portola S1	2017	A	16S408P099	16S408P099	2	28	05.23.2017	1
Portola S1	2017	A	16S408P103	16S408P103	2	28	05.23.2017	1
Portola S1	2017	A	16S408P105	16S408P105	2	28	05.23.2017	1
Portola S1	2017	A	16S408P107	16S408P107	2	28	05.23.2017	NA
Portola S1	2017	A	16S408P108	16S408P108	2	28	05.23.2017	1
Portola S1	2017	A	16S408P110	16S408P110	2	28	05.23.2017	1
Portola S1	2017	A	97C093P007	97C093P007	2	28	05.23.2017	1
Portola S1	2017	A	97C209P001	97C209P001	2	28	05.23.2017	1.5
Portola S1	2017	A	01C206P005	Portola	3	30	06.05.2017	NA
Portola S1	2017	A	16S408P002	16S408P002	3	30	06.05.2017	1
Portola S1	2017	A	16S408P015	16S408P015	3	30	06.05.2017	1
Portola S1	2017	A	16S408P023	16S408P023	3	30	06.05.2017	1
Portola S1	2017	A	16S408P025	16S408P025	3	30	06.05.2017	1
Portola S1	2017	A	16S408P029	16S408P029	3	30	06.05.2017	1
Portola S1	2017	A	16S408P030	16S408P030	3	30	06.05.2017	1.5
Portola S1	2017	A	16S408P031	16S408P031	3	30	06.05.2017	1
Portola S1	2017	A	16S408P033	16S408P033	3	30	06.05.2017	1
Portola S1	2017	A	16S408P038	16S408P038	3	30	06.05.2017	1
Portola S1	2017	A	16S408P040	16S408P040	3	30	06.05.2017	1
Portola S1	2017	A	16S408P043	16S408P043	3	30	06.05.2017	1
Portola S1	2017	A	16S408P055	16S408P055	3	30	06.05.2017	1
Portola S1	2017	A	16S408P068	16S408P068	3	30	06.05.2017	3
Portola S1	2017	A	16S408P072	16S408P072	3	30	06.05.2017	1
Portola S1	2017	A	16S408P075	16S408P075	3	30	06.05.2017	1.5
Portola S1	2017	A	16S408P077	16S408P077	3	30	06.05.2017	1
Portola S1	2017	A	16S408P078	16S408P078	3	30	06.05.2017	1
Portola S1	2017	A	16S408P081	16S408P081	3	30	06.05.2017	1
Portola S1	2017	A	16S408P082	16S408P082	3	30	06.05.2017	1
Portola S1	2017	A	16S408P089	16S408P089	3	30	06.05.2017	1
Portola S1	2017	A	16S408P099	16S408P099	3	30	06.05.2017	1
Portola S1	2017	A	16S408P103	16S408P103	3	30	06.05.2017	1
Portola S1	2017	A	16S408P105	16S408P105	3	30	06.05.2017	1
Portola S1	2017	A	16S408P107	16S408P107	3	30	06.05.2017	NA
Portola S1	2017	A	16S408P108	16S408P108	3	30	06.05.2017	1
Portola S1	2017	A	16S408P110	16S408P110	3	30	06.05.2017	1
Portola S1	2017	A	97C093P007	97C093P007	3	30	06.05.2017	1
Portola S1	2017	A	97C209P001	97C209P001	3	30	06.05.2017	1
Portola S1	2017	A	01C206P005	Portola	4	32	06.16.2017	NA
Portola S1	2017	A	16S408P002	16S408P002	4	32	06.16.2017	1
Portola S1	2017	A	16S408P015	16S408P015	4	32	06.16.2017	3
Portola S1	2017	A	16S408P023	16S408P023	4	32	06.16.2017	1
Portola S1	2017	A	16S408P025	16S408P025	4	32	06.16.2017	1.5
Portola S1	2017	A	16S408P029	16S408P029	4	32	06.16.2017	1
Portola S1	2017	A	16S408P030	16S408P030	4	32	06.16.2017	1.5
Portola S1	2017	A	16S408P031	16S408P031	4	32	06.16.2017	1.5
Portola S1	2017	A	16S408P033	16S408P033	4	32	06.16.2017	1
Portola S1	2017	A	16S408P038	16S408P038	4	32	06.16.2017	1.5
Portola S1	2017	A	16S408P040	16S408P040	4	32	06.16.2017	1
Portola S1	2017	A	16S408P043	16S408P043	4	32	06.16.2017	1.5
Portola S1	2017	A	16S408P055	16S408P055	4	32	06.16.2017	1
Portola S1	2017	A	16S408P068	16S408P068	4	32	06.16.2017	3.5
Portola S1	2017	A	16S408P072	16S408P072	4	32	06.16.2017	1
Portola S1	2017	A	16S408P075	16S408P075	4	32	06.16.2017	3
Portola S1	2017	A	16S408P077	16S408P077	4	32	06.16.2017	1
Portola S1	2017	A	16S408P078	16S408P078	4	32	06.16.2017	1
Portola S1	2017	A	16S408P081	16S408P081	4	32	06.16.2017	1.5
Portola S1	2017	A	16S408P082	16S408P082	4	32	06.16.2017	1
Portola S1	2017	A	16S408P089	16S408P089	4	32	06.16.2017	1.5
Portola S1	2017	A	16S408P099	16S408P099	4	32	06.16.2017	1
Portola S1	2017	A	16S408P103	16S408P103	4	32	06.16.2017	1.5
Portola S1	2017	A	16S408P105	16S408P105	4	32	06.16.2017	2.5
Portola S1	2017	A	16S408P107	16S408P107	4	32	06.16.2017	NA
Portola S1	2017	A	16S408P108	16S408P108	4	32	06.16.2017	1
Portola S1	2017	A	16S408P110	16S408P110	4	32	06.16.2017	1
Portola S1	2017	A	97C093P007	97C093P007	4	32	06.16.2017	1.5
Portola S1	2017	A	97C209P001	97C209P001	4	32	06.16.2017	1.5
Portola S1	2017	A	01C206P005	Portola	5	34	07.04.2017	NA
Portola S1	2017	A	16S408P002	16S408P002	5	34	07.04.2017	1.5
Portola S1	2017	A	16S408P015	16S408P015	5	34	07.04.2017	3.5
Portola S1	2017	A	16S408P023	16S408P023	5	34	07.04.2017	1
Portola S1	2017	A	16S408P025	16S408P025	5	34	07.04.2017	1
Portola S1	2017	A	16S408P029	16S408P029	5	34	07.04.2017	1
Portola S1	2017	A	16S408P030	16S408P030	5	34	07.04.2017	1.5
Portola S1	2017	A	16S408P031	16S408P031	5	34	07.04.2017	1.5
Portola S1	2017	A	16S408P033	16S408P033	5	34	07.04.2017	1.5
Portola S1	2017	A	16S408P038	16S408P038	5	34	07.04.2017	1.5
Portola S1	2017	A	16S408P040	16S408P040	5	34	07.04.2017	1
Portola S1	2017	A	16S408P043	16S408P043	5	34	07.04.2017	3.5
Portola S1	2017	A	16S408P055	16S408P055	5	34	07.04.2017	1.5
Portola S1	2017	A	16S408P068	16S408P068	5	34	07.04.2017	3.5
Portola S1	2017	A	16S408P072	16S408P072	5	34	07.04.2017	1.5
Portola S1	2017	A	16S408P075	16S408P075	5	34	07.04.2017	3
Portola S1	2017	A	16S408P077	16S408P077	5	34	07.04.2017	1
Portola S1	2017	A	16S408P078	16S408P078	5	34	07.04.2017	1
Portola S1	2017	A	16S408P081	16S408P081	5	34	07.04.2017	1.5
Portola S1	2017	A	16S408P082	16S408P082	5	34	07.04.2017	1.5
Portola S1	2017	A	16S408P089	16S408P089	5	34	07.04.2017	1.5
Portola S1	2017	A	16S408P099	16S408P099	5	34	07.04.2017	1
Portola S1	2017	A	16S408P103	16S408P103	5	34	07.04.2017	1.5
Portola S1	2017	A	16S408P105	16S408P105	5	34	07.04.2017	3
Portola S1	2017	A	16S408P107	16S408P107	5	34	07.04.2017	NA
Portola S1	2017	A	16S408P108	16S408P108	5	34	07.04.2017	1.5
Portola S1	2017	A	16S408P110	16S408P110	5	34	07.04.2017	1
Portola S1	2017	A	97C093P007	97C093P007	5	34	07.04.2017	1
Portola S1	2017	A	97C209P001	97C209P001	5	34	07.04.2017	1.5
Portola S1	2017	A	01C206P005	Portola	6	36	07.18.2017	NA
Portola S1	2017	A	16S408P002	16S408P002	6	36	07.18.2017	2
Portola S1	2017	A	16S408P015	16S408P015	6	36	07.18.2017	4
Portola S1	2017	A	16S408P023	16S408P023	6	36	07.18.2017	1
Portola S1	2017	A	16S408P025	16S408P025	6	36	07.18.2017	1
Portola S1	2017	A	16S408P029	16S408P029	6	36	07.18.2017	1.5
Portola S1	2017	A	16S408P030	16S408P030	6	36	07.18.2017	2.5
Portola S1	2017	A	16S408P031	16S408P031	6	36	07.18.2017	1.5
Portola S1	2017	A	16S408P033	16S408P033	6	36	07.18.2017	2
Portola S1	2017	A	16S408P038	16S408P038	6	36	07.18.2017	3.5
Portola S1	2017	A	16S408P040	16S408P040	6	36	07.18.2017	1
Portola S1	2017	A	16S408P043	16S408P043	6	36	07.18.2017	3.5
Portola S1	2017	A	16S408P055	16S408P055	6	36	07.18.2017	2.5
Portola S1	2017	A	16S408P068	16S408P068	6	36	07.18.2017	3.5
Portola S1	2017	A	16S408P072	16S408P072	6	36	07.18.2017	2.5
Portola S1	2017	A	16S408P075	16S408P075	6	36	07.18.2017	3.5
Portola S1	2017	A	16S408P077	16S408P077	6	36	07.18.2017	1.5
Portola S1	2017	A	16S408P078	16S408P078	6	36	07.18.2017	1
Portola S1	2017	A	16S408P081	16S408P081	6	36	07.18.2017	1
Portola S1	2017	A	16S408P082	16S408P082	6	36	07.18.2017	1
Portola S1	2017	A	16S408P089	16S408P089	6	36	07.18.2017	1
Portola S1	2017	A	16S408P099	16S408P099	6	36	07.18.2017	1.5
Portola S1	2017	A	16S408P103	16S408P103	6	36	07.18.2017	3.5
Portola S1	2017	A	16S408P105	16S408P105	6	36	07.18.2017	3.5
Portola S1	2017	A	16S408P107	16S408P107	6	36	07.18.2017	NA
Portola S1	2017	A	16S408P108	16S408P108	6	36	07.18.2017	2.5
Portola S1	2017	A	16S408P110	16S408P110	6	36	07.18.2017	1.5
Portola S1	2017	A	97C093P007	97C093P007	6	36	07.18.2017	1
Portola S1	2017	A	97C209P001	97C209P001	6	36	07.18.2017	1.5
Portola S1	2017	B	01C206P005	Portola	1	26	05.09.2017	1
Portola S1	2017	B	16S408P003	16S408P003	1	26	05.09.2017	1
Portola S1	2017	B	16S408P005	16S408P005	1	26	05.09.2017	1
Portola S1	2017	B	16S408P006	16S408P006	1	26	05.09.2017	1
Portola S1	2017	B	16S408P009	16S408P009	1	26	05.09.2017	1
Portola S1	2017	B	16S408P020	16S408P020	1	26	05.09.2017	1
Portola S1	2017	B	16S408P032	16S408P032	1	26	05.09.2017	1
Portola S1	2017	B	16S408P039	16S408P039	1	26	05.09.2017	1
Portola S1	2017	B	16S408P045	16S408P045	1	26	05.09.2017	1
Portola S1	2017	B	16S408P046	16S408P046	1	26	05.09.2017	1.5
Portola S1	2017	B	16S408P049	16S408P049	1	26	05.09.2017	1
Portola S1	2017	B	16S408P056	16S408P056	1	26	05.09.2017	1
Portola S1	2017	B	16S408P057	16S408P057	1	26	05.09.2017	1
Portola S1	2017	B	16S408P063	16S408P063	1	26	05.09.2017	1
Portola S1	2017	B	16S408P064	16S408P064	1	26	05.09.2017	1
Portola S1	2017	B	16S408P087	16S408P087	1	26	05.09.2017	1.5
Portola S1	2017	B	16S408P091	16S408P091	1	26	05.09.2017	1
Portola S1	2017	B	16S408P093	16S408P093	1	26	05.09.2017	1
Portola S1	2017	B	16S408P102	16S408P102	1	26	05.09.2017	1
Portola S1	2017	B	16S408P112	16S408P112	1	26	05.09.2017	1.5
Portola S1	2017	B	16S408P115	16S408P115	1	26	05.09.2017	1
Portola S1	2017	B	16S408P116	16S408P116	1	26	05.09.2017	1
Portola S1	2017	B	97C093P007	97C093P007	1	26	05.09.2017	1
Portola S1	2017	B	97C209P001	97C209P001	1	26	05.09.2017	1
Portola S1	2017	B	01C206P005	Portola	2	28	05.23.2017	1
Portola S1	2017	B	16S408P003	16S408P003	2	28	05.23.2017	1
Portola S1	2017	B	16S408P005	16S408P005	2	28	05.23.2017	1
Portola S1	2017	B	16S408P006	16S408P006	2	28	05.23.2017	1
Portola S1	2017	B	16S408P009	16S408P009	2	28	05.23.2017	1
Portola S1	2017	B	16S408P020	16S408P020	2	28	05.23.2017	1
Portola S1	2017	B	16S408P032	16S408P032	2	28	05.23.2017	1
Portola S1	2017	B	16S408P039	16S408P039	2	28	05.23.2017	1
Portola S1	2017	B	16S408P045	16S408P045	2	28	05.23.2017	1
Portola S1	2017	B	16S408P046	16S408P046	2	28	05.23.2017	2
Portola S1	2017	B	16S408P049	16S408P049	2	28	05.23.2017	1
Portola S1	2017	B	16S408P056	16S408P056	2	28	05.23.2017	1
Portola S1	2017	B	16S408P057	16S408P057	2	28	05.23.2017	1
Portola S1	2017	B	16S408P063	16S408P063	2	28	05.23.2017	1
Portola S1	2017	B	16S408P064	16S408P064	2	28	05.23.2017	1
Portola S1	2017	B	16S408P087	16S408P087	2	28	05.23.2017	2.5
Portola S1	2017	B	16S408P091	16S408P091	2	28	05.23.2017	1
Portola S1	2017	B	16S408P093	16S408P093	2	28	05.23.2017	1
Portola S1	2017	B	16S408P102	16S408P102	2	28	05.23.2017	1
Portola S1	2017	B	16S408P112	16S408P112	2	28	05.23.2017	1.5
Portola S1	2017	B	16S408P115	16S408P115	2	28	05.23.2017	1
Portola S1	2017	B	16S408P116	16S408P116	2	28	05.23.2017	2
Portola S1	2017	B	97C093P007	97C093P007	2	28	05.23.2017	1
Portola S1	2017	B	97C209P001	97C209P001	2	28	05.23.2017	1
Portola S1	2017	B	01C206P005	Portola	3	30	06.05.2017	1
Portola S1	2017	B	16S408P003	16S408P003	3	30	06.05.2017	1
Portola S1	2017	B	16S408P005	16S408P005	3	30	06.05.2017	1
Portola S1	2017	B	16S408P006	16S408P006	3	30	06.05.2017	1
Portola S1	2017	B	16S408P009	16S408P009	3	30	06.05.2017	1
Portola S1	2017	B	16S408P020	16S408P020	3	30	06.05.2017	1
Portola S1	2017	B	16S408P032	16S408P032	3	30	06.05.2017	1
Portola S1	2017	B	16S408P039	16S408P039	3	30	06.05.2017	1
Portola S1	2017	B	16S408P045	16S408P045	3	30	06.05.2017	1
Portola S1	2017	B	16S408P046	16S408P046	3	30	06.05.2017	1.5
Portola S1	2017	B	16S408P049	16S408P049	3	30	06.05.2017	1
Portola S1	2017	B	16S408P056	16S408P056	3	30	06.05.2017	1
Portola S1	2017	B	16S408P057	16S408P057	3	30	06.05.2017	1
Portola S1	2017	B	16S408P063	16S408P063	3	30	06.05.2017	1
Portola S1	2017	B	16S408P064	16S408P064	3	30	06.05.2017	1
Portola S1	2017	B	16S408P087	16S408P087	3	30	06.05.2017	3
Portola S1	2017	B	16S408P091	16S408P091	3	30	06.05.2017	1
Portola S1	2017	B	16S408P093	16S408P093	3	30	06.05.2017	1
Portola S1	2017	B	16S408P102	16S408P102	3	30	06.05.2017	1
Portola S1	2017	B	16S408P112	16S408P112	3	30	06.05.2017	2
Portola S1	2017	B	16S408P115	16S408P115	3	30	06.05.2017	1
Portola S1	2017	B	16S408P116	16S408P116	3	30	06.05.2017	1.5
Portola S1	2017	B	97C093P007	97C093P007	3	30	06.05.2017	1
Portola S1	2017	B	97C209P001	97C209P001	3	30	06.05.2017	1
Portola S1	2017	B	01C206P005	Portola	4	32	06.16.2017	1.5
Portola S1	2017	B	16S408P003	16S408P003	4	32	06.16.2017	2.5
Portola S1	2017	B	16S408P005	16S408P005	4	32	06.16.2017	1
Portola S1	2017	B	16S408P006	16S408P006	4	32	06.16.2017	1
Portola S1	2017	B	16S408P009	16S408P009	4	32	06.16.2017	1.5
Portola S1	2017	B	16S408P020	16S408P020	4	32	06.16.2017	1.5
Portola S1	2017	B	16S408P032	16S408P032	4	32	06.16.2017	1.5
Portola S1	2017	B	16S408P039	16S408P039	4	32	06.16.2017	1
Portola S1	2017	B	16S408P045	16S408P045	4	32	06.16.2017	1
Portola S1	2017	B	16S408P046	16S408P046	4	32	06.16.2017	2.5
Portola S1	2017	B	16S408P049	16S408P049	4	32	06.16.2017	1
Portola S1	2017	B	16S408P056	16S408P056	4	32	06.16.2017	1
Portola S1	2017	B	16S408P057	16S408P057	4	32	06.16.2017	1
Portola S1	2017	B	16S408P063	16S408P063	4	32	06.16.2017	1
Portola S1	2017	B	16S408P064	16S408P064	4	32	06.16.2017	1.5
Portola S1	2017	B	16S408P087	16S408P087	4	32	06.16.2017	3.5
Portola S1	2017	B	16S408P091	16S408P091	4	32	06.16.2017	1.5
Portola S1	2017	B	16S408P093	16S408P093	4	32	06.16.2017	1
Portola S1	2017	B	16S408P102	16S408P102	4	32	06.16.2017	1.5
Portola S1	2017	B	16S408P112	16S408P112	4	32	06.16.2017	2.5
Portola S1	2017	B	16S408P115	16S408P115	4	32	06.16.2017	1
Portola S1	2017	B	16S408P116	16S408P116	4	32	06.16.2017	3.5
Portola S1	2017	B	97C093P007	97C093P007	4	32	06.16.2017	1
Portola S1	2017	B	97C209P001	97C209P001	4	32	06.16.2017	1
Portola S1	2017	B	01C206P005	Portola	5	34	07.04.2017	1
Portola S1	2017	B	16S408P003	16S408P003	5	34	07.04.2017	1
Portola S1	2017	B	16S408P005	16S408P005	5	34	07.04.2017	1
Portola S1	2017	B	16S408P006	16S408P006	5	34	07.04.2017	1.5
Portola S1	2017	B	16S408P009	16S408P009	5	34	07.04.2017	1.5
Portola S1	2017	B	16S408P020	16S408P020	5	34	07.04.2017	1
Portola S1	2017	B	16S408P032	16S408P032	5	34	07.04.2017	1.5
Portola S1	2017	B	16S408P039	16S408P039	5	34	07.04.2017	1
Portola S1	2017	B	16S408P045	16S408P045	5	34	07.04.2017	1.5
Portola S1	2017	B	16S408P046	16S408P046	5	34	07.04.2017	3.5
Portola S1	2017	B	16S408P049	16S408P049	5	34	07.04.2017	1
Portola S1	2017	B	16S408P056	16S408P056	5	34	07.04.2017	1
Portola S1	2017	B	16S408P057	16S408P057	5	34	07.04.2017	1
Portola S1	2017	B	16S408P063	16S408P063	5	34	07.04.2017	1
Portola S1	2017	B	16S408P064	16S408P064	5	34	07.04.2017	2.5
Portola S1	2017	B	16S408P087	16S408P087	5	34	07.04.2017	4
Portola S1	2017	B	16S408P091	16S408P091	5	34	07.04.2017	1.5
Portola S1	2017	B	16S408P093	16S408P093	5	34	07.04.2017	1
Portola S1	2017	B	16S408P102	16S408P102	5	34	07.04.2017	1.5
Portola S1	2017	B	16S408P112	16S408P112	5	34	07.04.2017	3
Portola S1	2017	B	16S408P115	16S408P115	5	34	07.04.2017	1
Portola S1	2017	B	16S408P116	16S408P116	5	34	07.04.2017	3.5
Portola S1	2017	B	97C093P007	97C093P007	5	34	07.04.2017	1
Portola S1	2017	B	97C209P001	97C209P001	5	34	07.04.2017	1.5
Portola S1	2017	B	01C206P005	Portola	6	36	07.18.2017	1
Portola S1	2017	B	16S408P003	16S408P003	6	36	07.18.2017	1
Portola S1	2017	B	16S408P005	16S408P005	6	36	07.18.2017	1
Portola S1	2017	B	16S408P006	16S408P006	6	36	07.18.2017	1.5
Portola S1	2017	B	16S408P009	16S408P009	6	36	07.18.2017	1.5
Portola S1	2017	B	16S408P020	16S408P020	6	36	07.18.2017	1
Portola S1	2017	B	16S408P032	16S408P032	6	36	07.18.2017	1.5
Portola S1	2017	B	16S408P039	16S408P039	6	36	07.18.2017	1
Portola S1	2017	B	16S408P045	16S408P045	6	36	07.18.2017	1.5
Portola S1	2017	B	16S408P046	16S408P046	6	36	07.18.2017	3.5
Portola S1	2017	B	16S408P049	16S408P049	6	36	07.18.2017	1.5
Portola S1	2017	B	16S408P056	16S408P056	6	36	07.18.2017	1
Portola S1	2017	B	16S408P057	16S408P057	6	36	07.18.2017	1
Portola S1	2017	B	16S408P063	16S408P063	6	36	07.18.2017	1
Portola S1	2017	B	16S408P064	16S408P064	6	36	07.18.2017	3.5
Portola S1	2017	B	16S408P087	16S408P087	6	36	07.18.2017	4.5
Portola S1	2017	B	16S408P091	16S408P091	6	36	07.18.2017	1
Portola S1	2017	B	16S408P093	16S408P093	6	36	07.18.2017	1.5
Portola S1	2017	B	16S408P102	16S408P102	6	36	07.18.2017	1
Portola S1	2017	B	16S408P112	16S408P112	6	36	07.18.2017	3.5
Portola S1	2017	B	16S408P115	16S408P115	6	36	07.18.2017	1
Portola S1	2017	B	16S408P116	16S408P116	6	36	07.18.2017	4
Portola S1	2017	B	97C093P007	97C093P007	6	36	07.18.2017	1
Portola S1	2017	B	97C209P001	97C209P001	6	36	07.18.2017	1
Portola S1	2017	C	01C206P005	Portola	1	26	05.09.2017	1
Portola S1	2017	C	16S408P010	16S408P010	1	26	05.09.2017	1
Portola S1	2017	C	16S408P011	16S408P011	1	26	05.09.2017	1
Portola S1	2017	C	16S408P014	16S408P014	1	26	05.09.2017	1
Portola S1	2017	C	16S408P016	16S408P016	1	26	05.09.2017	1
Portola S1	2017	C	16S408P017	16S408P017	1	26	05.09.2017	1
Portola S1	2017	C	16S408P019	16S408P019	1	26	05.09.2017	1
Portola S1	2017	C	16S408P022	16S408P022	1	26	05.09.2017	1
Portola S1	2017	C	16S408P026	16S408P026	1	26	05.09.2017	1
Portola S1	2017	C	16S408P035	16S408P035	1	26	05.09.2017	1
Portola S1	2017	C	16S408P036	16S408P036	1	26	05.09.2017	1
Portola S1	2017	C	16S408P037	16S408P037	1	26	05.09.2017	1
Portola S1	2017	C	16S408P042	16S408P042	1	26	05.09.2017	1
Portola S1	2017	C	16S408P052	16S408P052	1	26	05.09.2017	1
Portola S1	2017	C	16S408P066	16S408P066	1	26	05.09.2017	1.5
Portola S1	2017	C	16S408P070	16S408P070	1	26	05.09.2017	1
Portola S1	2017	C	16S408P076	16S408P076	1	26	05.09.2017	1
Portola S1	2017	C	16S408P080	16S408P080	1	26	05.09.2017	1
Portola S1	2017	C	16S408P094	16S408P094	1	26	05.09.2017	1
Portola S1	2017	C	16S408P106	16S408P106	1	26	05.09.2017	1
Portola S1	2017	C	16S408P122	16S408P122	1	26	05.09.2017	1
Portola S1	2017	C	16S408P123	16S408P123	1	26	05.09.2017	1
Portola S1	2017	C	97C093P007	97C093P007	1	26	05.09.2017	1
Portola S1	2017	C	97C209P001	97C209P001	1	26	05.09.2017	1
Portola S1	2017	C	01C206P005	Portola	2	28	05.23.2017	1
Portola S1	2017	C	16S408P010	16S408P010	2	28	05.23.2017	1
Portola S1	2017	C	16S408P011	16S408P011	2	28	05.23.2017	1
Portola S1	2017	C	16S408P014	16S408P014	2	28	05.23.2017	1
Portola S1	2017	C	16S408P016	16S408P016	2	28	05.23.2017	1
Portola S1	2017	C	16S408P017	16S408P017	2	28	05.23.2017	1
Portola S1	2017	C	16S408P019	16S408P019	2	28	05.23.2017	1
Portola S1	2017	C	16S408P022	16S408P022	2	28	05.23.2017	1
Portola S1	2017	C	16S408P026	16S408P026	2	28	05.23.2017	1
Portola S1	2017	C	16S408P035	16S408P035	2	28	05.23.2017	1
Portola S1	2017	C	16S408P036	16S408P036	2	28	05.23.2017	1
Portola S1	2017	C	16S408P037	16S408P037	2	28	05.23.2017	1
Portola S1	2017	C	16S408P042	16S408P042	2	28	05.23.2017	1
Portola S1	2017	C	16S408P052	16S408P052	2	28	05.23.2017	1
Portola S1	2017	C	16S408P066	16S408P066	2	28	05.23.2017	1
Portola S1	2017	C	16S408P070	16S408P070	2	28	05.23.2017	1
Portola S1	2017	C	16S408P076	16S408P076	2	28	05.23.2017	1
Portola S1	2017	C	16S408P080	16S408P080	2	28	05.23.2017	1
Portola S1	2017	C	16S408P094	16S408P094	2	28	05.23.2017	1
Portola S1	2017	C	16S408P106	16S408P106	2	28	05.23.2017	1
Portola S1	2017	C	16S408P122	16S408P122	2	28	05.23.2017	1.5
Portola S1	2017	C	16S408P123	16S408P123	2	28	05.23.2017	1
Portola S1	2017	C	97C093P007	97C093P007	2	28	05.23.2017	1
Portola S1	2017	C	97C209P001	97C209P001	2	28	05.23.2017	1
Portola S1	2017	C	01C206P005	Portola	3	30	06.05.2017	1
Portola S1	2017	C	16S408P010	16S408P010	3	30	06.05.2017	1
Portola S1	2017	C	16S408P011	16S408P011	3	30	06.05.2017	1
Portola S1	2017	C	16S408P014	16S408P014	3	30	06.05.2017	1
Portola S1	2017	C	16S408P016	16S408P016	3	30	06.05.2017	1
Portola S1	2017	C	16S408P017	16S408P017	3	30	06.05.2017	1
Portola S1	2017	C	16S408P019	16S408P019	3	30	06.05.2017	1
Portola S1	2017	C	16S408P022	16S408P022	3	30	06.05.2017	1
Portola S1	2017	C	16S408P026	16S408P026	3	30	06.05.2017	1
Portola S1	2017	C	16S408P035	16S408P035	3	30	06.05.2017	1
Portola S1	2017	C	16S408P036	16S408P036	3	30	06.05.2017	1
Portola S1	2017	C	16S408P037	16S408P037	3	30	06.05.2017	1
Portola S1	2017	C	16S408P042	16S408P042	3	30	06.05.2017	1
Portola S1	2017	C	16S408P052	16S408P052	3	30	06.05.2017	1
Portola S1	2017	C	16S408P066	16S408P066	3	30	06.05.2017	2.5
Portola S1	2017	C	16S408P070	16S408P070	3	30	06.05.2017	1
Portola S1	2017	C	16S408P076	16S408P076	3	30	06.05.2017	1
Portola S1	2017	C	16S408P080	16S408P080	3	30	06.05.2017	1
Portola S1	2017	C	16S408P094	16S408P094	3	30	06.05.2017	1
Portola S1	2017	C	16S408P106	16S408P106	3	30	06.05.2017	1
Portola S1	2017	C	16S408P122	16S408P122	3	30	06.05.2017	1
Portola S1	2017	C	16S408P123	16S408P123	3	30	06.05.2017	1
Portola S1	2017	C	97C093P007	97C093P007	3	30	06.05.2017	1
Portola S1	2017	C	97C209P001	97C209P001	3	30	06.05.2017	1
Portola S1	2017	C	01C206P005	Portola	4	32	06.16.2017	1.5
Portola S1	2017	C	16S408P010	16S408P010	4	32	06.16.2017	1.5
Portola S1	2017	C	16S408P011	16S408P011	4	32	06.16.2017	1.5
Portola S1	2017	C	16S408P014	16S408P014	4	32	06.16.2017	1
Portola S1	2017	C	16S408P016	16S408P016	4	32	06.16.2017	2.5
Portola S1	2017	C	16S408P017	16S408P017	4	32	06.16.2017	1
Portola S1	2017	C	16S408P019	16S408P019	4	32	06.16.2017	2.5
Portola S1	2017	C	16S408P022	16S408P022	4	32	06.16.2017	1
Portola S1	2017	C	16S408P026	16S408P026	4	32	06.16.2017	1
Portola S1	2017	C	16S408P035	16S408P035	4	32	06.16.2017	1
Portola S1	2017	C	16S408P036	16S408P036	4	32	06.16.2017	1
Portola S1	2017	C	16S408P037	16S408P037	4	32	06.16.2017	1
Portola S1	2017	C	16S408P042	16S408P042	4	32	06.16.2017	1
Portola S1	2017	C	16S408P052	16S408P052	4	32	06.16.2017	1.5
Portola S1	2017	C	16S408P066	16S408P066	4	32	06.16.2017	4
Portola S1	2017	C	16S408P070	16S408P070	4	32	06.16.2017	1
Portola S1	2017	C	16S408P076	16S408P076	4	32	06.16.2017	1
Portola S1	2017	C	16S408P080	16S408P080	4	32	06.16.2017	3.5
Portola S1	2017	C	16S408P094	16S408P094	4	32	06.16.2017	1
Portola S1	2017	C	16S408P106	16S408P106	4	32	06.16.2017	1
Portola S1	2017	C	16S408P122	16S408P122	4	32	06.16.2017	1.5
Portola S1	2017	C	16S408P123	16S408P123	4	32	06.16.2017	1
Portola S1	2017	C	97C093P007	97C093P007	4	32	06.16.2017	1
Portola S1	2017	C	97C209P001	97C209P001	4	32	06.16.2017	1
Portola S1	2017	C	01C206P005	Portola	5	34	07.04.2017	1.5
Portola S1	2017	C	16S408P010	16S408P010	5	34	07.04.2017	1.5
Portola S1	2017	C	16S408P011	16S408P011	5	34	07.04.2017	1.5
Portola S1	2017	C	16S408P014	16S408P014	5	34	07.04.2017	1
Portola S1	2017	C	16S408P016	16S408P016	5	34	07.04.2017	3.5
Portola S1	2017	C	16S408P017	16S408P017	5	34	07.04.2017	1
Portola S1	2017	C	16S408P019	16S408P019	5	34	07.04.2017	1
Portola S1	2017	C	16S408P022	16S408P022	5	34	07.04.2017	1
Portola S1	2017	C	16S408P026	16S408P026	5	34	07.04.2017	1
Portola S1	2017	C	16S408P035	16S408P035	5	34	07.04.2017	1
Portola S1	2017	C	16S408P036	16S408P036	5	34	07.04.2017	1
Portola S1	2017	C	16S408P037	16S408P037	5	34	07.04.2017	1
Portola S1	2017	C	16S408P042	16S408P042	5	34	07.04.2017	1.5
Portola S1	2017	C	16S408P052	16S408P052	5	34	07.04.2017	1
Portola S1	2017	C	16S408P066	16S408P066	5	34	07.04.2017	5
Portola S1	2017	C	16S408P070	16S408P070	5	34	07.04.2017	2.5
Portola S1	2017	C	16S408P076	16S408P076	5	34	07.04.2017	1
Portola S1	2017	C	16S408P080	16S408P080	5	34	07.04.2017	4
Portola S1	2017	C	16S408P094	16S408P094	5	34	07.04.2017	1
Portola S1	2017	C	16S408P106	16S408P106	5	34	07.04.2017	1
Portola S1	2017	C	16S408P122	16S408P122	5	34	07.04.2017	1
Portola S1	2017	C	16S408P123	16S408P123	5	34	07.04.2017	1
Portola S1	2017	C	97C093P007	97C093P007	5	34	07.04.2017	1
Portola S1	2017	C	97C209P001	97C209P001	5	34	07.04.2017	1
Portola S1	2017	C	01C206P005	Portola	6	36	07.18.2017	1
Portola S1	2017	C	16S408P010	16S408P010	6	36	07.18.2017	1.5
Portola S1	2017	C	16S408P011	16S408P011	6	36	07.18.2017	2.5
Portola S1	2017	C	16S408P014	16S408P014	6	36	07.18.2017	1
Portola S1	2017	C	16S408P016	16S408P016	6	36	07.18.2017	4
Portola S1	2017	C	16S408P017	16S408P017	6	36	07.18.2017	1
Portola S1	2017	C	16S408P019	16S408P019	6	36	07.18.2017	1
Portola S1	2017	C	16S408P022	16S408P022	6	36	07.18.2017	1.5
Portola S1	2017	C	16S408P026	16S408P026	6	36	07.18.2017	1
Portola S1	2017	C	16S408P035	16S408P035	6	36	07.18.2017	1
Portola S1	2017	C	16S408P036	16S408P036	6	36	07.18.2017	1
Portola S1	2017	C	16S408P037	16S408P037	6	36	07.18.2017	1.5
Portola S1	2017	C	16S408P042	16S408P042	6	36	07.18.2017	1.5
Portola S1	2017	C	16S408P052	16S408P052	6	36	07.18.2017	1
Portola S1	2017	C	16S408P066	16S408P066	6	36	07.18.2017	5
Portola S1	2017	C	16S408P070	16S408P070	6	36	07.18.2017	3.5
Portola S1	2017	C	16S408P076	16S408P076	6	36	07.18.2017	1.5
Portola S1	2017	C	16S408P080	16S408P080	6	36	07.18.2017	5
Portola S1	2017	C	16S408P094	16S408P094	6	36	07.18.2017	1
Portola S1	2017	C	16S408P106	16S408P106	6	36	07.18.2017	1
Portola S1	2017	C	16S408P122	16S408P122	6	36	07.18.2017	1
Portola S1	2017	C	16S408P123	16S408P123	6	36	07.18.2017	1
Portola S1	2017	C	97C093P007	97C093P007	6	36	07.18.2017	1
Portola S1	2017	C	97C209P001	97C209P001	6	36	07.18.2017	1
Portola S1	2017	D	01C206P005	Portola	1	26	05.09.2017	1
Portola S1	2017	D	16S408P007	16S408P007	1	26	05.09.2017	1
Portola S1	2017	D	16S408P008	16S408P008	1	26	05.09.2017	1
Portola S1	2017	D	16S408P018	16S408P018	1	26	05.09.2017	1
Portola S1	2017	D	16S408P021	16S408P021	1	26	05.09.2017	1
Portola S1	2017	D	16S408P027	16S408P027	1	26	05.09.2017	1
Portola S1	2017	D	16S408P044	16S408P044	1	26	05.09.2017	1
Portola S1	2017	D	16S408P047	16S408P047	1	26	05.09.2017	1
Portola S1	2017	D	16S408P051	16S408P051	1	26	05.09.2017	1
Portola S1	2017	D	16S408P058	16S408P058	1	26	05.09.2017	1
Portola S1	2017	D	16S408P065	16S408P065	1	26	05.09.2017	1
Portola S1	2017	D	16S408P069	16S408P069	1	26	05.09.2017	1
Portola S1	2017	D	16S408P083	16S408P083	1	26	05.09.2017	1
Portola S1	2017	D	16S408P090	16S408P090	1	26	05.09.2017	1
Portola S1	2017	D	16S408P097	16S408P097	1	26	05.09.2017	1
Portola S1	2017	D	16S408P098	16S408P098	1	26	05.09.2017	1
Portola S1	2017	D	16S408P100	16S408P100	1	26	05.09.2017	1
Portola S1	2017	D	16S408P101	16S408P101	1	26	05.09.2017	1
Portola S1	2017	D	16S408P104	16S408P104	1	26	05.09.2017	1
Portola S1	2017	D	16S408P109	16S408P109	1	26	05.09.2017	1
Portola S1	2017	D	16S408P111	16S408P111	1	26	05.09.2017	1
Portola S1	2017	D	16S408P113	16S408P113	1	26	05.09.2017	1
Portola S1	2017	D	16S408P114	16S408P114	1	26	05.09.2017	1
Portola S1	2017	D	16S408P117	16S408P117	1	26	05.09.2017	1
Portola S1	2017	D	16S408P119	16S408P119	1	26	05.09.2017	1
Portola S1	2017	D	16S408P120	16S408P120	1	26	05.09.2017	1
Portola S1	2017	D	97C093P007	97C093P007	1	26	05.09.2017	1
Portola S1	2017	D	97C209P001	97C209P001	1	26	05.09.2017	1
Portola S1	2017	D	01C206P005	Portola	2	28	05.23.2017	1
Portola S1	2017	D	16S408P007	16S408P007	2	28	05.23.2017	1
Portola S1	2017	D	16S408P008	16S408P008	2	28	05.23.2017	1
Portola S1	2017	D	16S408P018	16S408P018	2	28	05.23.2017	1
Portola S1	2017	D	16S408P021	16S408P021	2	28	05.23.2017	1
Portola S1	2017	D	16S408P027	16S408P027	2	28	05.23.2017	1
Portola S1	2017	D	16S408P044	16S408P044	2	28	05.23.2017	1
Portola S1	2017	D	16S408P047	16S408P047	2	28	05.23.2017	1
Portola S1	2017	D	16S408P051	16S408P051	2	28	05.23.2017	1
Portola S1	2017	D	16S408P058	16S408P058	2	28	05.23.2017	1
Portola S1	2017	D	16S408P065	16S408P065	2	28	05.23.2017	1
Portola S1	2017	D	16S408P069	16S408P069	2	28	05.23.2017	1
Portola S1	2017	D	16S408P083	16S408P083	2	28	05.23.2017	1
Portola S1	2017	D	16S408P090	16S408P090	2	28	05.23.2017	1
Portola S1	2017	D	16S408P097	16S408P097	2	28	05.23.2017	1
Portola S1	2017	D	16S408P098	16S408P098	2	28	05.23.2017	1
Portola S1	2017	D	16S408P100	16S408P100	2	28	05.23.2017	1
Portola S1	2017	D	16S408P101	16S408P101	2	28	05.23.2017	1
Portola S1	2017	D	16S408P104	16S408P104	2	28	05.23.2017	1
Portola S1	2017	D	16S408P109	16S408P109	2	28	05.23.2017	1
Portola S1	2017	D	16S408P111	16S408P111	2	28	05.23.2017	1
Portola S1	2017	D	16S408P113	16S408P113	2	28	05.23.2017	1
Portola S1	2017	D	16S408P114	16S408P114	2	28	05.23.2017	1
Portola S1	2017	D	16S408P117	16S408P117	2	28	05.23.2017	1
Portola S1	2017	D	16S408P119	16S408P119	2	28	05.23.2017	1
Portola S1	2017	D	16S408P120	16S408P120	2	28	05.23.2017	1
Portola S1	2017	D	97C093P007	97C093P007	2	28	05.23.2017	1
Portola S1	2017	D	97C209P001	97C209P001	2	28	05.23.2017	1
Portola S1	2017	D	01C206P005	Portola	3	30	06.05.2017	1
Portola S1	2017	D	16S408P007	16S408P007	3	30	06.05.2017	1
Portola S1	2017	D	16S408P008	16S408P008	3	30	06.05.2017	1
Portola S1	2017	D	16S408P018	16S408P018	3	30	06.05.2017	1
Portola S1	2017	D	16S408P021	16S408P021	3	30	06.05.2017	1
Portola S1	2017	D	16S408P027	16S408P027	3	30	06.05.2017	1
Portola S1	2017	D	16S408P044	16S408P044	3	30	06.05.2017	1
Portola S1	2017	D	16S408P047	16S408P047	3	30	06.05.2017	1
Portola S1	2017	D	16S408P051	16S408P051	3	30	06.05.2017	1
Portola S1	2017	D	16S408P058	16S408P058	3	30	06.05.2017	1
Portola S1	2017	D	16S408P065	16S408P065	3	30	06.05.2017	1
Portola S1	2017	D	16S408P069	16S408P069	3	30	06.05.2017	1
Portola S1	2017	D	16S408P083	16S408P083	3	30	06.05.2017	1
Portola S1	2017	D	16S408P090	16S408P090	3	30	06.05.2017	1
Portola S1	2017	D	16S408P097	16S408P097	3	30	06.05.2017	1
Portola S1	2017	D	16S408P098	16S408P098	3	30	06.05.2017	1
Portola S1	2017	D	16S408P100	16S408P100	3	30	06.05.2017	1
Portola S1	2017	D	16S408P101	16S408P101	3	30	06.05.2017	1
Portola S1	2017	D	16S408P104	16S408P104	3	30	06.05.2017	1
Portola S1	2017	D	16S408P109	16S408P109	3	30	06.05.2017	1
Portola S1	2017	D	16S408P111	16S408P111	3	30	06.05.2017	1
Portola S1	2017	D	16S408P113	16S408P113	3	30	06.05.2017	1
Portola S1	2017	D	16S408P114	16S408P114	3	30	06.05.2017	1
Portola S1	2017	D	16S408P117	16S408P117	3	30	06.05.2017	1
Portola S1	2017	D	16S408P119	16S408P119	3	30	06.05.2017	1
Portola S1	2017	D	16S408P120	16S408P120	3	30	06.05.2017	1
Portola S1	2017	D	97C093P007	97C093P007	3	30	06.05.2017	1
Portola S1	2017	D	97C209P001	97C209P001	3	30	06.05.2017	1
Portola S1	2017	D	01C206P005	Portola	4	32	06.16.2017	1.5
Portola S1	2017	D	16S408P007	16S408P007	4	32	06.16.2017	1
Portola S1	2017	D	16S408P008	16S408P008	4	32	06.16.2017	1
Portola S1	2017	D	16S408P018	16S408P018	4	32	06.16.2017	1
Portola S1	2017	D	16S408P021	16S408P021	4	32	06.16.2017	1
Portola S1	2017	D	16S408P027	16S408P027	4	32	06.16.2017	1.5
Portola S1	2017	D	16S408P044	16S408P044	4	32	06.16.2017	1.5
Portola S1	2017	D	16S408P047	16S408P047	4	32	06.16.2017	1
Portola S1	2017	D	16S408P051	16S408P051	4	32	06.16.2017	1
Portola S1	2017	D	16S408P058	16S408P058	4	32	06.16.2017	1
Portola S1	2017	D	16S408P065	16S408P065	4	32	06.16.2017	1
Portola S1	2017	D	16S408P069	16S408P069	4	32	06.16.2017	1
Portola S1	2017	D	16S408P083	16S408P083	4	32	06.16.2017	1.5
Portola S1	2017	D	16S408P090	16S408P090	4	32	06.16.2017	1
Portola S1	2017	D	16S408P097	16S408P097	4	32	06.16.2017	1
Portola S1	2017	D	16S408P098	16S408P098	4	32	06.16.2017	1
Portola S1	2017	D	16S408P100	16S408P100	4	32	06.16.2017	1.5
Portola S1	2017	D	16S408P101	16S408P101	4	32	06.16.2017	1
Portola S1	2017	D	16S408P104	16S408P104	4	32	06.16.2017	1
Portola S1	2017	D	16S408P109	16S408P109	4	32	06.16.2017	1
Portola S1	2017	D	16S408P111	16S408P111	4	32	06.16.2017	1
Portola S1	2017	D	16S408P113	16S408P113	4	32	06.16.2017	1
Portola S1	2017	D	16S408P114	16S408P114	4	32	06.16.2017	1
Portola S1	2017	D	16S408P117	16S408P117	4	32	06.16.2017	1
Portola S1	2017	D	16S408P119	16S408P119	4	32	06.16.2017	3
Portola S1	2017	D	16S408P120	16S408P120	4	32	06.16.2017	1
Portola S1	2017	D	97C093P007	97C093P007	4	32	06.16.2017	1
Portola S1	2017	D	97C209P001	97C209P001	4	32	06.16.2017	1.5
Portola S1	2017	D	01C206P005	Portola	5	34	07.04.2017	1.5
Portola S1	2017	D	16S408P007	16S408P007	5	34	07.04.2017	1.5
Portola S1	2017	D	16S408P008	16S408P008	5	34	07.04.2017	1
Portola S1	2017	D	16S408P018	16S408P018	5	34	07.04.2017	1
Portola S1	2017	D	16S408P021	16S408P021	5	34	07.04.2017	1.5
Portola S1	2017	D	16S408P027	16S408P027	5	34	07.04.2017	1.5
Portola S1	2017	D	16S408P044	16S408P044	5	34	07.04.2017	2.5
Portola S1	2017	D	16S408P047	16S408P047	5	34	07.04.2017	1
Portola S1	2017	D	16S408P051	16S408P051	5	34	07.04.2017	1
Portola S1	2017	D	16S408P058	16S408P058	5	34	07.04.2017	1
Portola S1	2017	D	16S408P065	16S408P065	5	34	07.04.2017	1
Portola S1	2017	D	16S408P069	16S408P069	5	34	07.04.2017	1.5
Portola S1	2017	D	16S408P083	16S408P083	5	34	07.04.2017	1
Portola S1	2017	D	16S408P090	16S408P090	5	34	07.04.2017	1
Portola S1	2017	D	16S408P097	16S408P097	5	34	07.04.2017	1
Portola S1	2017	D	16S408P098	16S408P098	5	34	07.04.2017	1.5
Portola S1	2017	D	16S408P100	16S408P100	5	34	07.04.2017	2.5
Portola S1	2017	D	16S408P101	16S408P101	5	34	07.04.2017	1.5
Portola S1	2017	D	16S408P104	16S408P104	5	34	07.04.2017	1.5
Portola S1	2017	D	16S408P109	16S408P109	5	34	07.04.2017	1
Portola S1	2017	D	16S408P111	16S408P111	5	34	07.04.2017	1.5
Portola S1	2017	D	16S408P113	16S408P113	5	34	07.04.2017	1
Portola S1	2017	D	16S408P114	16S408P114	5	34	07.04.2017	1
Portola S1	2017	D	16S408P117	16S408P117	5	34	07.04.2017	1
Portola S1	2017	D	16S408P119	16S408P119	5	34	07.04.2017	3
Portola S1	2017	D	16S408P120	16S408P120	5	34	07.04.2017	1
Portola S1	2017	D	97C093P007	97C093P007	5	34	07.04.2017	1
Portola S1	2017	D	97C209P001	97C209P001	5	34	07.04.2017	1.5
Portola S1	2017	D	01C206P005	Portola	6	36	07.18.2017	1.5
Portola S1	2017	D	16S408P007	16S408P007	6	36	07.18.2017	1.5
Portola S1	2017	D	16S408P008	16S408P008	6	36	07.18.2017	1
Portola S1	2017	D	16S408P018	16S408P018	6	36	07.18.2017	2.5
Portola S1	2017	D	16S408P021	16S408P021	6	36	07.18.2017	1.5
Portola S1	2017	D	16S408P027	16S408P027	6	36	07.18.2017	1.5
Portola S1	2017	D	16S408P044	16S408P044	6	36	07.18.2017	3.5
Portola S1	2017	D	16S408P047	16S408P047	6	36	07.18.2017	1
Portola S1	2017	D	16S408P051	16S408P051	6	36	07.18.2017	1.5
Portola S1	2017	D	16S408P058	16S408P058	6	36	07.18.2017	2.5
Portola S1	2017	D	16S408P065	16S408P065	6	36	07.18.2017	1.5
Portola S1	2017	D	16S408P069	16S408P069	6	36	07.18.2017	1
Portola S1	2017	D	16S408P083	16S408P083	6	36	07.18.2017	1.5
Portola S1	2017	D	16S408P090	16S408P090	6	36	07.18.2017	1
Portola S1	2017	D	16S408P097	16S408P097	6	36	07.18.2017	1
Portola S1	2017	D	16S408P098	16S408P098	6	36	07.18.2017	3
Portola S1	2017	D	16S408P100	16S408P100	6	36	07.18.2017	3
Portola S1	2017	D	16S408P101	16S408P101	6	36	07.18.2017	1
Portola S1	2017	D	16S408P104	16S408P104	6	36	07.18.2017	1.5
Portola S1	2017	D	16S408P109	16S408P109	6	36	07.18.2017	1.5
Portola S1	2017	D	16S408P111	16S408P111	6	36	07.18.2017	2
Portola S1	2017	D	16S408P113	16S408P113	6	36	07.18.2017	1
Portola S1	2017	D	16S408P114	16S408P114	6	36	07.18.2017	1.5
Portola S1	2017	D	16S408P117	16S408P117	6	36	07.18.2017	1
Portola S1	2017	D	16S408P119	16S408P119	6	36	07.18.2017	3.5
Portola S1	2017	D	16S408P120	16S408P120	6	36	07.18.2017	2.5
Portola S1	2017	D	97C093P007	97C093P007	6	36	07.18.2017	1
Portola S1	2017	D	97C209P001	97C209P001	6	36	07.18.2017	4

## Sheet: Fronteras S1
Set	Year	Replication	Accession Number	Alias	Timepoint	Weeks Post-Inoculation	Date	Score
Fronteras S1	2017	A	04C018P004	04C018P004	1	26	05.09.2017	1
Fronteras S1	2017	A	05C165P001	05C165P001	1	26	05.09.2017	5
Fronteras S1	2017	A	08C132P608	Fronteras	1	26	05.09.2017	1
Fronteras S1	2017	A	16S907P001	16S907P001	1	26	05.09.2017	1
Fronteras S1	2017	A	16S907P003	16S907P003	1	26	05.09.2017	1
Fronteras S1	2017	A	16S907P007	16S907P007	1	26	05.09.2017	1
Fronteras S1	2017	A	16S907P011	16S907P011	1	26	05.09.2017	1
Fronteras S1	2017	A	16S907P016	16S907P016	1	26	05.09.2017	2
Fronteras S1	2017	A	16S907P021	16S907P021	1	26	05.09.2017	1
Fronteras S1	2017	A	16S907P028	16S907P028	1	26	05.09.2017	1
Fronteras S1	2017	A	16S907P041	16S907P041	1	26	05.09.2017	1
Fronteras S1	2017	A	16S907P055	16S907P055	1	26	05.09.2017	1
Fronteras S1	2017	A	16S907P064	16S907P064	1	26	05.09.2017	1
Fronteras S1	2017	A	16S907P067	16S907P067	1	26	05.09.2017	1
Fronteras S1	2017	A	16S907P069	16S907P069	1	26	05.09.2017	1
Fronteras S1	2017	A	16S907P075	16S907P075	1	26	05.09.2017	1.5
Fronteras S1	2017	A	16S907P079	16S907P079	1	26	05.09.2017	1
Fronteras S1	2017	A	16S907P092	16S907P092	1	26	05.09.2017	1
Fronteras S1	2017	A	16S907P094	16S907P094	1	26	05.09.2017	1
Fronteras S1	2017	A	16S907P099	16S907P099	1	26	05.09.2017	1
Fronteras S1	2017	A	16S907P116	16S907P116	1	26	05.09.2017	1
Fronteras S1	2017	A	16S907P118	16S907P118	1	26	05.09.2017	1.5
Fronteras S1	2017	A	16S907P122	16S907P122	1	26	05.09.2017	1
Fronteras S1	2017	A	16S907P140	16S907P140	1	26	05.09.2017	1.5
Fronteras S1	2017	A	04C018P004	04C018P004	2	28	05.23.2017	2
Fronteras S1	2017	A	05C165P001	05C165P001	2	28	05.23.2017	5
Fronteras S1	2017	A	08C132P608	Fronteras	2	28	05.23.2017	1.5
Fronteras S1	2017	A	16S907P001	16S907P001	2	28	05.23.2017	1
Fronteras S1	2017	A	16S907P003	16S907P003	2	28	05.23.2017	1
Fronteras S1	2017	A	16S907P007	16S907P007	2	28	05.23.2017	1.5
Fronteras S1	2017	A	16S907P011	16S907P011	2	28	05.23.2017	1
Fronteras S1	2017	A	16S907P016	16S907P016	2	28	05.23.2017	2
Fronteras S1	2017	A	16S907P021	16S907P021	2	28	05.23.2017	1
Fronteras S1	2017	A	16S907P028	16S907P028	2	28	05.23.2017	1
Fronteras S1	2017	A	16S907P041	16S907P041	2	28	05.23.2017	1
Fronteras S1	2017	A	16S907P055	16S907P055	2	28	05.23.2017	1
Fronteras S1	2017	A	16S907P064	16S907P064	2	28	05.23.2017	1
Fronteras S1	2017	A	16S907P067	16S907P067	2	28	05.23.2017	1
Fronteras S1	2017	A	16S907P069	16S907P069	2	28	05.23.2017	1
Fronteras S1	2017	A	16S907P075	16S907P075	2	28	05.23.2017	2
Fronteras S1	2017	A	16S907P079	16S907P079	2	28	05.23.2017	1
Fronteras S1	2017	A	16S907P092	16S907P092	2	28	05.23.2017	1
Fronteras S1	2017	A	16S907P094	16S907P094	2	28	05.23.2017	2
Fronteras S1	2017	A	16S907P099	16S907P099	2	28	05.23.2017	1
Fronteras S1	2017	A	16S907P116	16S907P116	2	28	05.23.2017	1
Fronteras S1	2017	A	16S907P118	16S907P118	2	28	05.23.2017	1.5
Fronteras S1	2017	A	16S907P122	16S907P122	2	28	05.23.2017	1
Fronteras S1	2017	A	16S907P140	16S907P140	2	28	05.23.2017	1.5
Fronteras S1	2017	A	04C018P004	04C018P004	3	30	06.05.2017	2
Fronteras S1	2017	A	05C165P001	05C165P001	3	30	06.05.2017	5
Fronteras S1	2017	A	08C132P608	Fronteras	3	30	06.05.2017	1
Fronteras S1	2017	A	16S907P001	16S907P001	3	30	06.05.2017	1
Fronteras S1	2017	A	16S907P003	16S907P003	3	30	06.05.2017	1
Fronteras S1	2017	A	16S907P007	16S907P007	3	30	06.05.2017	1.5
Fronteras S1	2017	A	16S907P011	16S907P011	3	30	06.05.2017	1
Fronteras S1	2017	A	16S907P016	16S907P016	3	30	06.05.2017	2.5
Fronteras S1	2017	A	16S907P021	16S907P021	3	30	06.05.2017	1
Fronteras S1	2017	A	16S907P028	16S907P028	3	30	06.05.2017	1
Fronteras S1	2017	A	16S907P041	16S907P041	3	30	06.05.2017	1
Fronteras S1	2017	A	16S907P055	16S907P055	3	30	06.05.2017	1
Fronteras S1	2017	A	16S907P064	16S907P064	3	30	06.05.2017	1
Fronteras S1	2017	A	16S907P067	16S907P067	3	30	06.05.2017	1
Fronteras S1	2017	A	16S907P069	16S907P069	3	30	06.05.2017	1
Fronteras S1	2017	A	16S907P075	16S907P075	3	30	06.05.2017	2
Fronteras S1	2017	A	16S907P079	16S907P079	3	30	06.05.2017	1
Fronteras S1	2017	A	16S907P092	16S907P092	3	30	06.05.2017	1
Fronteras S1	2017	A	16S907P094	16S907P094	3	30	06.05.2017	1.5
Fronteras S1	2017	A	16S907P099	16S907P099	3	30	06.05.2017	1
Fronteras S1	2017	A	16S907P116	16S907P116	3	30	06.05.2017	1
Fronteras S1	2017	A	16S907P118	16S907P118	3	30	06.05.2017	1.5
Fronteras S1	2017	A	16S907P122	16S907P122	3	30	06.05.2017	1
Fronteras S1	2017	A	16S907P140	16S907P140	3	30	06.05.2017	1.5
Fronteras S1	2017	A	04C018P004	04C018P004	4	32	06.16.2017	2
Fronteras S1	2017	A	05C165P001	05C165P001	4	32	06.16.2017	5
Fronteras S1	2017	A	08C132P608	Fronteras	4	32	06.16.2017	1.5
Fronteras S1	2017	A	16S907P001	16S907P001	4	32	06.16.2017	1.5
Fronteras S1	2017	A	16S907P003	16S907P003	4	32	06.16.2017	1
Fronteras S1	2017	A	16S907P007	16S907P007	4	32	06.16.2017	1.5
Fronteras S1	2017	A	16S907P011	16S907P011	4	32	06.16.2017	1.5
Fronteras S1	2017	A	16S907P016	16S907P016	4	32	06.16.2017	2
Fronteras S1	2017	A	16S907P021	16S907P021	4	32	06.16.2017	2.5
Fronteras S1	2017	A	16S907P028	16S907P028	4	32	06.16.2017	1
Fronteras S1	2017	A	16S907P041	16S907P041	4	32	06.16.2017	1.5
Fronteras S1	2017	A	16S907P055	16S907P055	4	32	06.16.2017	1
Fronteras S1	2017	A	16S907P064	16S907P064	4	32	06.16.2017	1
Fronteras S1	2017	A	16S907P067	16S907P067	4	32	06.16.2017	1.5
Fronteras S1	2017	A	16S907P069	16S907P069	4	32	06.16.2017	2.5
Fronteras S1	2017	A	16S907P075	16S907P075	4	32	06.16.2017	2
Fronteras S1	2017	A	16S907P079	16S907P079	4	32	06.16.2017	3
Fronteras S1	2017	A	16S907P092	16S907P092	4	32	06.16.2017	1
Fronteras S1	2017	A	16S907P094	16S907P094	4	32	06.16.2017	1.5
Fronteras S1	2017	A	16S907P099	16S907P099	4	32	06.16.2017	1.5
Fronteras S1	2017	A	16S907P116	16S907P116	4	32	06.16.2017	1.5
Fronteras S1	2017	A	16S907P118	16S907P118	4	32	06.16.2017	1.5
Fronteras S1	2017	A	16S907P122	16S907P122	4	32	06.16.2017	1
Fronteras S1	2017	A	16S907P140	16S907P140	4	32	06.16.2017	1.5
Fronteras S1	2017	A	04C018P004	04C018P004	5	34	07.04.2017	2
Fronteras S1	2017	A	05C165P001	05C165P001	5	34	07.04.2017	5
Fronteras S1	2017	A	08C132P608	Fronteras	5	34	07.04.2017	1.5
Fronteras S1	2017	A	16S907P001	16S907P001	5	34	07.04.2017	2.5
Fronteras S1	2017	A	16S907P003	16S907P003	5	34	07.04.2017	1
Fronteras S1	2017	A	16S907P007	16S907P007	5	34	07.04.2017	1.5
Fronteras S1	2017	A	16S907P011	16S907P011	5	34	07.04.2017	1.5
Fronteras S1	2017	A	16S907P016	16S907P016	5	34	07.04.2017	2.5
Fronteras S1	2017	A	16S907P021	16S907P021	5	34	07.04.2017	2.5
Fronteras S1	2017	A	16S907P028	16S907P028	5	34	07.04.2017	1
Fronteras S1	2017	A	16S907P041	16S907P041	5	34	07.04.2017	1.5
Fronteras S1	2017	A	16S907P055	16S907P055	5	34	07.04.2017	1.5
Fronteras S1	2017	A	16S907P064	16S907P064	5	34	07.04.2017	1.5
Fronteras S1	2017	A	16S907P067	16S907P067	5	34	07.04.2017	1.5
Fronteras S1	2017	A	16S907P069	16S907P069	5	34	07.04.2017	2.5
Fronteras S1	2017	A	16S907P075	16S907P075	5	34	07.04.2017	1.5
Fronteras S1	2017	A	16S907P079	16S907P079	5	34	07.04.2017	3
Fronteras S1	2017	A	16S907P092	16S907P092	5	34	07.04.2017	1
Fronteras S1	2017	A	16S907P094	16S907P094	5	34	07.04.2017	3
Fronteras S1	2017	A	16S907P099	16S907P099	5	34	07.04.2017	3
Fronteras S1	2017	A	16S907P116	16S907P116	5	34	07.04.2017	1
Fronteras S1	2017	A	16S907P118	16S907P118	5	34	07.04.2017	1.5
Fronteras S1	2017	A	16S907P122	16S907P122	5	34	07.04.2017	1
Fronteras S1	2017	A	16S907P140	16S907P140	5	34	07.04.2017	1.5
Fronteras S1	2017	A	04C018P004	04C018P004	6	36	07.18.2017	4
Fronteras S1	2017	A	05C165P001	05C165P001	6	36	07.18.2017	5
Fronteras S1	2017	A	08C132P608	Fronteras	6	36	07.18.2017	1.5
Fronteras S1	2017	A	16S907P001	16S907P001	6	36	07.18.2017	3
Fronteras S1	2017	A	16S907P003	16S907P003	6	36	07.18.2017	1
Fronteras S1	2017	A	16S907P007	16S907P007	6	36	07.18.2017	1.5
Fronteras S1	2017	A	16S907P011	16S907P011	6	36	07.18.2017	1
Fronteras S1	2017	A	16S907P016	16S907P016	6	36	07.18.2017	3.5
Fronteras S1	2017	A	16S907P021	16S907P021	6	36	07.18.2017	2.5
Fronteras S1	2017	A	16S907P028	16S907P028	6	36	07.18.2017	1
Fronteras S1	2017	A	16S907P041	16S907P041	6	36	07.18.2017	1.5
Fronteras S1	2017	A	16S907P055	16S907P055	6	36	07.18.2017	1.5
Fronteras S1	2017	A	16S907P064	16S907P064	6	36	07.18.2017	1.5
Fronteras S1	2017	A	16S907P067	16S907P067	6	36	07.18.2017	1.5
Fronteras S1	2017	A	16S907P069	16S907P069	6	36	07.18.2017	3.5
Fronteras S1	2017	A	16S907P075	16S907P075	6	36	07.18.2017	1.5
Fronteras S1	2017	A	16S907P079	16S907P079	6	36	07.18.2017	3.5
Fronteras S1	2017	A	16S907P092	16S907P092	6	36	07.18.2017	1
Fronteras S1	2017	A	16S907P094	16S907P094	6	36	07.18.2017	3.5
Fronteras S1	2017	A	16S907P099	16S907P099	6	36	07.18.2017	3.5
Fronteras S1	2017	A	16S907P116	16S907P116	6	36	07.18.2017	1.5
Fronteras S1	2017	A	16S907P118	16S907P118	6	36	07.18.2017	1
Fronteras S1	2017	A	16S907P122	16S907P122	6	36	07.18.2017	1
Fronteras S1	2017	A	16S907P140	16S907P140	6	36	07.18.2017	2
Fronteras S1	2017	B	04C018P004	04C018P004	1	26	05.09.2017	1
Fronteras S1	2017	B	05C165P001	05C165P001	1	26	05.09.2017	1.5
Fronteras S1	2017	B	08C132P608	Fronteras	1	26	05.09.2017	1
Fronteras S1	2017	B	16S907P014	16S907P014	1	26	05.09.2017	1
Fronteras S1	2017	B	16S907P015	16S907P015	1	26	05.09.2017	1
Fronteras S1	2017	B	16S907P025	16S907P025	1	26	05.09.2017	1
Fronteras S1	2017	B	16S907P030	16S907P030	1	26	05.09.2017	1
Fronteras S1	2017	B	16S907P031	16S907P031	1	26	05.09.2017	1.5
Fronteras S1	2017	B	16S907P032	16S907P032	1	26	05.09.2017	1
Fronteras S1	2017	B	16S907P039	16S907P039	1	26	05.09.2017	1
Fronteras S1	2017	B	16S907P047	16S907P047	1	26	05.09.2017	1
Fronteras S1	2017	B	16S907P048	16S907P048	1	26	05.09.2017	1
Fronteras S1	2017	B	16S907P059	16S907P059	1	26	05.09.2017	1
Fronteras S1	2017	B	16S907P065	16S907P065	1	26	05.09.2017	1
Fronteras S1	2017	B	16S907P076	16S907P076	1	26	05.09.2017	1
Fronteras S1	2017	B	16S907P081	16S907P081	1	26	05.09.2017	1
Fronteras S1	2017	B	16S907P084	16S907P084	1	26	05.09.2017	1
Fronteras S1	2017	B	16S907P090	16S907P090	1	26	05.09.2017	1
Fronteras S1	2017	B	16S907P095	16S907P095	1	26	05.09.2017	1
Fronteras S1	2017	B	16S907P097	16S907P097	1	26	05.09.2017	1
Fronteras S1	2017	B	16S907P103	16S907P103	1	26	05.09.2017	1
Fronteras S1	2017	B	16S907P112	16S907P112	1	26	05.09.2017	1
Fronteras S1	2017	B	16S907P117	16S907P117	1	26	05.09.2017	1
Fronteras S1	2017	B	16S907P121	16S907P121	1	26	05.09.2017	1
Fronteras S1	2017	B	16S907P123	16S907P123	1	26	05.09.2017	1
Fronteras S1	2017	B	16S907P125	16S907P125	1	26	05.09.2017	1.5
Fronteras S1	2017	B	16S907P128	16S907P128	1	26	05.09.2017	1
Fronteras S1	2017	B	16S907P133	16S907P133	1	26	05.09.2017	1
Fronteras S1	2017	B	16S907P143	16S907P143	1	26	05.09.2017	1
Fronteras S1	2017	B	04C018P004	04C018P004	2	28	05.23.2017	1
Fronteras S1	2017	B	05C165P001	05C165P001	2	28	05.23.2017	1.5
Fronteras S1	2017	B	08C132P608	Fronteras	2	28	05.23.2017	1
Fronteras S1	2017	B	16S907P014	16S907P014	2	28	05.23.2017	1
Fronteras S1	2017	B	16S907P015	16S907P015	2	28	05.23.2017	1
Fronteras S1	2017	B	16S907P025	16S907P025	2	28	05.23.2017	1.5
Fronteras S1	2017	B	16S907P030	16S907P030	2	28	05.23.2017	1
Fronteras S1	2017	B	16S907P031	16S907P031	2	28	05.23.2017	1.5
Fronteras S1	2017	B	16S907P032	16S907P032	2	28	05.23.2017	1.5
Fronteras S1	2017	B	16S907P039	16S907P039	2	28	05.23.2017	1
Fronteras S1	2017	B	16S907P047	16S907P047	2	28	05.23.2017	1
Fronteras S1	2017	B	16S907P048	16S907P048	2	28	05.23.2017	1
Fronteras S1	2017	B	16S907P059	16S907P059	2	28	05.23.2017	1
Fronteras S1	2017	B	16S907P065	16S907P065	2	28	05.23.2017	1
Fronteras S1	2017	B	16S907P076	16S907P076	2	28	05.23.2017	1
Fronteras S1	2017	B	16S907P081	16S907P081	2	28	05.23.2017	1
Fronteras S1	2017	B	16S907P084	16S907P084	2	28	05.23.2017	1.5
Fronteras S1	2017	B	16S907P090	16S907P090	2	28	05.23.2017	1
Fronteras S1	2017	B	16S907P095	16S907P095	2	28	05.23.2017	1
Fronteras S1	2017	B	16S907P097	16S907P097	2	28	05.23.2017	1
Fronteras S1	2017	B	16S907P103	16S907P103	2	28	05.23.2017	1
Fronteras S1	2017	B	16S907P112	16S907P112	2	28	05.23.2017	1
Fronteras S1	2017	B	16S907P117	16S907P117	2	28	05.23.2017	1
Fronteras S1	2017	B	16S907P121	16S907P121	2	28	05.23.2017	1
Fronteras S1	2017	B	16S907P123	16S907P123	2	28	05.23.2017	1
Fronteras S1	2017	B	16S907P125	16S907P125	2	28	05.23.2017	1.5
Fronteras S1	2017	B	16S907P128	16S907P128	2	28	05.23.2017	1
Fronteras S1	2017	B	16S907P133	16S907P133	2	28	05.23.2017	1
Fronteras S1	2017	B	16S907P143	16S907P143	2	28	05.23.2017	1
Fronteras S1	2017	B	04C018P004	04C018P004	3	30	06.05.2017	1
Fronteras S1	2017	B	05C165P001	05C165P001	3	30	06.05.2017	2
Fronteras S1	2017	B	08C132P608	Fronteras	3	30	06.05.2017	1
Fronteras S1	2017	B	16S907P014	16S907P014	3	30	06.05.2017	1
Fronteras S1	2017	B	16S907P015	16S907P015	3	30	06.05.2017	1
Fronteras S1	2017	B	16S907P025	16S907P025	3	30	06.05.2017	1
Fronteras S1	2017	B	16S907P030	16S907P030	3	30	06.05.2017	1
Fronteras S1	2017	B	16S907P031	16S907P031	3	30	06.05.2017	1.5
Fronteras S1	2017	B	16S907P032	16S907P032	3	30	06.05.2017	1.5
Fronteras S1	2017	B	16S907P039	16S907P039	3	30	06.05.2017	1
Fronteras S1	2017	B	16S907P047	16S907P047	3	30	06.05.2017	1
Fronteras S1	2017	B	16S907P048	16S907P048	3	30	06.05.2017	1
Fronteras S1	2017	B	16S907P059	16S907P059	3	30	06.05.2017	1
Fronteras S1	2017	B	16S907P065	16S907P065	3	30	06.05.2017	1
Fronteras S1	2017	B	16S907P076	16S907P076	3	30	06.05.2017	1
Fronteras S1	2017	B	16S907P081	16S907P081	3	30	06.05.2017	1
Fronteras S1	2017	B	16S907P084	16S907P084	3	30	06.05.2017	1.5
Fronteras S1	2017	B	16S907P090	16S907P090	3	30	06.05.2017	1
Fronteras S1	2017	B	16S907P095	16S907P095	3	30	06.05.2017	1
Fronteras S1	2017	B	16S907P097	16S907P097	3	30	06.05.2017	1
Fronteras S1	2017	B	16S907P103	16S907P103	3	30	06.05.2017	1
Fronteras S1	2017	B	16S907P112	16S907P112	3	30	06.05.2017	1.5
Fronteras S1	2017	B	16S907P117	16S907P117	3	30	06.05.2017	1
Fronteras S1	2017	B	16S907P121	16S907P121	3	30	06.05.2017	1
Fronteras S1	2017	B	16S907P123	16S907P123	3	30	06.05.2017	1
Fronteras S1	2017	B	16S907P125	16S907P125	3	30	06.05.2017	2
Fronteras S1	2017	B	16S907P128	16S907P128	3	30	06.05.2017	1
Fronteras S1	2017	B	16S907P133	16S907P133	3	30	06.05.2017	1
Fronteras S1	2017	B	16S907P143	16S907P143	3	30	06.05.2017	1
Fronteras S1	2017	B	04C018P004	04C018P004	4	32	06.16.2017	1
Fronteras S1	2017	B	05C165P001	05C165P001	4	32	06.16.2017	2
Fronteras S1	2017	B	08C132P608	Fronteras	4	32	06.16.2017	1
Fronteras S1	2017	B	16S907P014	16S907P014	4	32	06.16.2017	1
Fronteras S1	2017	B	16S907P015	16S907P015	4	32	06.16.2017	1
Fronteras S1	2017	B	16S907P025	16S907P025	4	32	06.16.2017	1
Fronteras S1	2017	B	16S907P030	16S907P030	4	32	06.16.2017	1
Fronteras S1	2017	B	16S907P031	16S907P031	4	32	06.16.2017	1.5
Fronteras S1	2017	B	16S907P032	16S907P032	4	32	06.16.2017	1.5
Fronteras S1	2017	B	16S907P039	16S907P039	4	32	06.16.2017	1.5
Fronteras S1	2017	B	16S907P047	16S907P047	4	32	06.16.2017	1
Fronteras S1	2017	B	16S907P048	16S907P048	4	32	06.16.2017	1
Fronteras S1	2017	B	16S907P059	16S907P059	4	32	06.16.2017	1
Fronteras S1	2017	B	16S907P065	16S907P065	4	32	06.16.2017	1
Fronteras S1	2017	B	16S907P076	16S907P076	4	32	06.16.2017	1
Fronteras S1	2017	B	16S907P081	16S907P081	4	32	06.16.2017	1
Fronteras S1	2017	B	16S907P084	16S907P084	4	32	06.16.2017	1.5
Fronteras S1	2017	B	16S907P090	16S907P090	4	32	06.16.2017	1.5
Fronteras S1	2017	B	16S907P095	16S907P095	4	32	06.16.2017	1
Fronteras S1	2017	B	16S907P097	16S907P097	4	32	06.16.2017	1
Fronteras S1	2017	B	16S907P103	16S907P103	4	32	06.16.2017	1.5
Fronteras S1	2017	B	16S907P112	16S907P112	4	32	06.16.2017	1.5
Fronteras S1	2017	B	16S907P117	16S907P117	4	32	06.16.2017	1.5
Fronteras S1	2017	B	16S907P121	16S907P121	4	32	06.16.2017	1
Fronteras S1	2017	B	16S907P123	16S907P123	4	32	06.16.2017	1.5
Fronteras S1	2017	B	16S907P125	16S907P125	4	32	06.16.2017	2
Fronteras S1	2017	B	16S907P128	16S907P128	4	32	06.16.2017	1
Fronteras S1	2017	B	16S907P133	16S907P133	4	32	06.16.2017	1.5
Fronteras S1	2017	B	16S907P143	16S907P143	4	32	06.16.2017	1.5
Fronteras S1	2017	B	04C018P004	04C018P004	5	34	07.04.2017	1
Fronteras S1	2017	B	05C165P001	05C165P001	5	34	07.04.2017	2.5
Fronteras S1	2017	B	08C132P608	Fronteras	5	34	07.04.2017	1
Fronteras S1	2017	B	16S907P014	16S907P014	5	34	07.04.2017	1.5
Fronteras S1	2017	B	16S907P015	16S907P015	5	34	07.04.2017	1.5
Fronteras S1	2017	B	16S907P025	16S907P025	5	34	07.04.2017	1
Fronteras S1	2017	B	16S907P030	16S907P030	5	34	07.04.2017	1.5
Fronteras S1	2017	B	16S907P031	16S907P031	5	34	07.04.2017	2
Fronteras S1	2017	B	16S907P032	16S907P032	5	34	07.04.2017	1.5
Fronteras S1	2017	B	16S907P039	16S907P039	5	34	07.04.2017	1.5
Fronteras S1	2017	B	16S907P047	16S907P047	5	34	07.04.2017	1.5
Fronteras S1	2017	B	16S907P048	16S907P048	5	34	07.04.2017	1
Fronteras S1	2017	B	16S907P059	16S907P059	5	34	07.04.2017	1
Fronteras S1	2017	B	16S907P065	16S907P065	5	34	07.04.2017	1.5
Fronteras S1	2017	B	16S907P076	16S907P076	5	34	07.04.2017	1.5
Fronteras S1	2017	B	16S907P081	16S907P081	5	34	07.04.2017	1
Fronteras S1	2017	B	16S907P084	16S907P084	5	34	07.04.2017	1.5
Fronteras S1	2017	B	16S907P090	16S907P090	5	34	07.04.2017	1.5
Fronteras S1	2017	B	16S907P095	16S907P095	5	34	07.04.2017	1.5
Fronteras S1	2017	B	16S907P097	16S907P097	5	34	07.04.2017	1
Fronteras S1	2017	B	16S907P103	16S907P103	5	34	07.04.2017	1.5
Fronteras S1	2017	B	16S907P112	16S907P112	5	34	07.04.2017	1.5
Fronteras S1	2017	B	16S907P117	16S907P117	5	34	07.04.2017	1.5
Fronteras S1	2017	B	16S907P121	16S907P121	5	34	07.04.2017	1
Fronteras S1	2017	B	16S907P123	16S907P123	5	34	07.04.2017	1.5
Fronteras S1	2017	B	16S907P125	16S907P125	5	34	07.04.2017	2
Fronteras S1	2017	B	16S907P128	16S907P128	5	34	07.04.2017	1
Fronteras S1	2017	B	16S907P133	16S907P133	5	34	07.04.2017	1.5
Fronteras S1	2017	B	16S907P143	16S907P143	5	34	07.04.2017	1
Fronteras S1	2017	B	04C018P004	04C018P004	6	36	07.18.2017	1
Fronteras S1	2017	B	05C165P001	05C165P001	6	36	07.18.2017	3.5
Fronteras S1	2017	B	08C132P608	Fronteras	6	36	07.18.2017	1.5
Fronteras S1	2017	B	16S907P014	16S907P014	6	36	07.18.2017	1
Fronteras S1	2017	B	16S907P015	16S907P015	6	36	07.18.2017	1
Fronteras S1	2017	B	16S907P025	16S907P025	6	36	07.18.2017	1
Fronteras S1	2017	B	16S907P030	16S907P030	6	36	07.18.2017	1.5
Fronteras S1	2017	B	16S907P031	16S907P031	6	36	07.18.2017	1.5
Fronteras S1	2017	B	16S907P032	16S907P032	6	36	07.18.2017	1.5
Fronteras S1	2017	B	16S907P039	16S907P039	6	36	07.18.2017	1.5
Fronteras S1	2017	B	16S907P047	16S907P047	6	36	07.18.2017	1
Fronteras S1	2017	B	16S907P048	16S907P048	6	36	07.18.2017	1
Fronteras S1	2017	B	16S907P059	16S907P059	6	36	07.18.2017	1.5
Fronteras S1	2017	B	16S907P065	16S907P065	6	36	07.18.2017	1
Fronteras S1	2017	B	16S907P076	16S907P076	6	36	07.18.2017	1.5
Fronteras S1	2017	B	16S907P081	16S907P081	6	36	07.18.2017	1
Fronteras S1	2017	B	16S907P084	16S907P084	6	36	07.18.2017	1.5
Fronteras S1	2017	B	16S907P090	16S907P090	6	36	07.18.2017	1.5
Fronteras S1	2017	B	16S907P095	16S907P095	6	36	07.18.2017	1.5
Fronteras S1	2017	B	16S907P097	16S907P097	6	36	07.18.2017	1
Fronteras S1	2017	B	16S907P103	16S907P103	6	36	07.18.2017	1
Fronteras S1	2017	B	16S907P112	16S907P112	6	36	07.18.2017	1.5
Fronteras S1	2017	B	16S907P117	16S907P117	6	36	07.18.2017	1
Fronteras S1	2017	B	16S907P121	16S907P121	6	36	07.18.2017	1
Fronteras S1	2017	B	16S907P123	16S907P123	6	36	07.18.2017	1.5
Fronteras S1	2017	B	16S907P125	16S907P125	6	36	07.18.2017	3
Fronteras S1	2017	B	16S907P128	16S907P128	6	36	07.18.2017	1
Fronteras S1	2017	B	16S907P133	16S907P133	6	36	07.18.2017	1
Fronteras S1	2017	B	16S907P143	16S907P143	6	36	07.18.2017	1
Fronteras S1	2017	C	04C018P004	04C018P004	1	26	05.09.2017	1
Fronteras S1	2017	C	05C165P001	05C165P001	1	26	05.09.2017	3
Fronteras S1	2017	C	08C132P608	Fronteras	1	26	05.09.2017	1
Fronteras S1	2017	C	16S907P002	16S907P002	1	26	05.09.2017	1
Fronteras S1	2017	C	16S907P010	16S907P010	1	26	05.09.2017	1.5
Fronteras S1	2017	C	16S907P017	16S907P017	1	26	05.09.2017	1
Fronteras S1	2017	C	16S907P042	16S907P042	1	26	05.09.2017	1
Fronteras S1	2017	C	16S907P043	16S907P043	1	26	05.09.2017	1
Fronteras S1	2017	C	16S907P049	16S907P049	1	26	05.09.2017	1
Fronteras S1	2017	C	16S907P057	16S907P057	1	26	05.09.2017	1
Fronteras S1	2017	C	16S907P063	16S907P063	1	26	05.09.2017	1.5
Fronteras S1	2017	C	16S907P072	16S907P072	1	26	05.09.2017	1
Fronteras S1	2017	C	16S907P082	16S907P082	1	26	05.09.2017	2
Fronteras S1	2017	C	16S907P083	16S907P083	1	26	05.09.2017	1
Fronteras S1	2017	C	16S907P088	16S907P088	1	26	05.09.2017	1
Fronteras S1	2017	C	16S907P096	16S907P096	1	26	05.09.2017	1.5
Fronteras S1	2017	C	16S907P106	16S907P106	1	26	05.09.2017	1
Fronteras S1	2017	C	16S907P108	16S907P108	1	26	05.09.2017	1
Fronteras S1	2017	C	16S907P110	16S907P110	1	26	05.09.2017	1
Fronteras S1	2017	C	16S907P120	16S907P120	1	26	05.09.2017	1
Fronteras S1	2017	C	16S907P129	16S907P129	1	26	05.09.2017	1.5
Fronteras S1	2017	C	16S907P135	16S907P135	1	26	05.09.2017	1
Fronteras S1	2017	C	16S907P136	16S907P136	1	26	05.09.2017	1.5
Fronteras S1	2017	C	16S907P142	16S907P142	1	26	05.09.2017	1.5
Fronteras S1	2017	C	16S907P144	16S907P144	1	26	05.09.2017	1
Fronteras S1	2017	C	04C018P004	04C018P004	2	28	05.23.2017	1
Fronteras S1	2017	C	05C165P001	05C165P001	2	28	05.23.2017	3
Fronteras S1	2017	C	08C132P608	Fronteras	2	28	05.23.2017	1
Fronteras S1	2017	C	16S907P002	16S907P002	2	28	05.23.2017	1
Fronteras S1	2017	C	16S907P010	16S907P010	2	28	05.23.2017	1
Fronteras S1	2017	C	16S907P017	16S907P017	2	28	05.23.2017	1
Fronteras S1	2017	C	16S907P042	16S907P042	2	28	05.23.2017	1
Fronteras S1	2017	C	16S907P043	16S907P043	2	28	05.23.2017	1.5
Fronteras S1	2017	C	16S907P049	16S907P049	2	28	05.23.2017	1
Fronteras S1	2017	C	16S907P057	16S907P057	2	28	05.23.2017	1
Fronteras S1	2017	C	16S907P063	16S907P063	2	28	05.23.2017	1
Fronteras S1	2017	C	16S907P072	16S907P072	2	28	05.23.2017	1
Fronteras S1	2017	C	16S907P082	16S907P082	2	28	05.23.2017	2
Fronteras S1	2017	C	16S907P083	16S907P083	2	28	05.23.2017	1
Fronteras S1	2017	C	16S907P088	16S907P088	2	28	05.23.2017	1
Fronteras S1	2017	C	16S907P096	16S907P096	2	28	05.23.2017	1.5
Fronteras S1	2017	C	16S907P106	16S907P106	2	28	05.23.2017	1
Fronteras S1	2017	C	16S907P108	16S907P108	2	28	05.23.2017	1
Fronteras S1	2017	C	16S907P110	16S907P110	2	28	05.23.2017	1
Fronteras S1	2017	C	16S907P120	16S907P120	2	28	05.23.2017	1
Fronteras S1	2017	C	16S907P129	16S907P129	2	28	05.23.2017	1.5
Fronteras S1	2017	C	16S907P135	16S907P135	2	28	05.23.2017	1
Fronteras S1	2017	C	16S907P136	16S907P136	2	28	05.23.2017	1
Fronteras S1	2017	C	16S907P142	16S907P142	2	28	05.23.2017	1.5
Fronteras S1	2017	C	16S907P144	16S907P144	2	28	05.23.2017	1
Fronteras S1	2017	C	04C018P004	04C018P004	3	30	06.05.2017	1
Fronteras S1	2017	C	05C165P001	05C165P001	3	30	06.05.2017	2.5
Fronteras S1	2017	C	08C132P608	Fronteras	3	30	06.05.2017	1
Fronteras S1	2017	C	16S907P002	16S907P002	3	30	06.05.2017	1
Fronteras S1	2017	C	16S907P010	16S907P010	3	30	06.05.2017	1.5
Fronteras S1	2017	C	16S907P017	16S907P017	3	30	06.05.2017	1
Fronteras S1	2017	C	16S907P042	16S907P042	3	30	06.05.2017	1
Fronteras S1	2017	C	16S907P043	16S907P043	3	30	06.05.2017	1
Fronteras S1	2017	C	16S907P049	16S907P049	3	30	06.05.2017	1
Fronteras S1	2017	C	16S907P057	16S907P057	3	30	06.05.2017	1
Fronteras S1	2017	C	16S907P063	16S907P063	3	30	06.05.2017	1.5
Fronteras S1	2017	C	16S907P072	16S907P072	3	30	06.05.2017	1.5
Fronteras S1	2017	C	16S907P082	16S907P082	3	30	06.05.2017	2
Fronteras S1	2017	C	16S907P083	16S907P083	3	30	06.05.2017	1
Fronteras S1	2017	C	16S907P088	16S907P088	3	30	06.05.2017	1
Fronteras S1	2017	C	16S907P096	16S907P096	3	30	06.05.2017	1
Fronteras S1	2017	C	16S907P106	16S907P106	3	30	06.05.2017	1
Fronteras S1	2017	C	16S907P108	16S907P108	3	30	06.05.2017	1
Fronteras S1	2017	C	16S907P110	16S907P110	3	30	06.05.2017	1
Fronteras S1	2017	C	16S907P120	16S907P120	3	30	06.05.2017	1
Fronteras S1	2017	C	16S907P129	16S907P129	3	30	06.05.2017	1.5
Fronteras S1	2017	C	16S907P135	16S907P135	3	30	06.05.2017	1
Fronteras S1	2017	C	16S907P136	16S907P136	3	30	06.05.2017	1
Fronteras S1	2017	C	16S907P142	16S907P142	3	30	06.05.2017	1.5
Fronteras S1	2017	C	16S907P144	16S907P144	3	30	06.05.2017	1
Fronteras S1	2017	C	04C018P004	04C018P004	4	32	06.16.2017	1
Fronteras S1	2017	C	05C165P001	05C165P001	4	32	06.16.2017	2.5
Fronteras S1	2017	C	08C132P608	Fronteras	4	32	06.16.2017	1.5
Fronteras S1	2017	C	16S907P002	16S907P002	4	32	06.16.2017	1
Fronteras S1	2017	C	16S907P010	16S907P010	4	32	06.16.2017	1.5
Fronteras S1	2017	C	16S907P017	16S907P017	4	32	06.16.2017	1
Fronteras S1	2017	C	16S907P042	16S907P042	4	32	06.16.2017	1
Fronteras S1	2017	C	16S907P043	16S907P043	4	32	06.16.2017	1.5
Fronteras S1	2017	C	16S907P049	16S907P049	4	32	06.16.2017	1
Fronteras S1	2017	C	16S907P057	16S907P057	4	32	06.16.2017	1
Fronteras S1	2017	C	16S907P063	16S907P063	4	32	06.16.2017	1.5
Fronteras S1	2017	C	16S907P072	16S907P072	4	32	06.16.2017	1
Fronteras S1	2017	C	16S907P082	16S907P082	4	32	06.16.2017	2.5
Fronteras S1	2017	C	16S907P083	16S907P083	4	32	06.16.2017	1
Fronteras S1	2017	C	16S907P088	16S907P088	4	32	06.16.2017	1
Fronteras S1	2017	C	16S907P096	16S907P096	4	32	06.16.2017	2
Fronteras S1	2017	C	16S907P106	16S907P106	4	32	06.16.2017	1
Fronteras S1	2017	C	16S907P108	16S907P108	4	32	06.16.2017	1
Fronteras S1	2017	C	16S907P110	16S907P110	4	32	06.16.2017	1.5
Fronteras S1	2017	C	16S907P120	16S907P120	4	32	06.16.2017	1
Fronteras S1	2017	C	16S907P129	16S907P129	4	32	06.16.2017	3
Fronteras S1	2017	C	16S907P135	16S907P135	4	32	06.16.2017	1
Fronteras S1	2017	C	16S907P136	16S907P136	4	32	06.16.2017	1.5
Fronteras S1	2017	C	16S907P142	16S907P142	4	32	06.16.2017	2
Fronteras S1	2017	C	16S907P144	16S907P144	4	32	06.16.2017	1
Fronteras S1	2017	C	04C018P004	04C018P004	5	34	07.04.2017	1
Fronteras S1	2017	C	05C165P001	05C165P001	5	34	07.04.2017	2
Fronteras S1	2017	C	08C132P608	Fronteras	5	34	07.04.2017	1.5
Fronteras S1	2017	C	16S907P002	16S907P002	5	34	07.04.2017	1
Fronteras S1	2017	C	16S907P010	16S907P010	5	34	07.04.2017	3
Fronteras S1	2017	C	16S907P017	16S907P017	5	34	07.04.2017	2.5
Fronteras S1	2017	C	16S907P042	16S907P042	5	34	07.04.2017	1.5
Fronteras S1	2017	C	16S907P043	16S907P043	5	34	07.04.2017	1.5
Fronteras S1	2017	C	16S907P049	16S907P049	5	34	07.04.2017	1.5
Fronteras S1	2017	C	16S907P057	16S907P057	5	34	07.04.2017	1
Fronteras S1	2017	C	16S907P063	16S907P063	5	34	07.04.2017	2
Fronteras S1	2017	C	16S907P072	16S907P072	5	34	07.04.2017	1.5
Fronteras S1	2017	C	16S907P082	16S907P082	5	34	07.04.2017	3
Fronteras S1	2017	C	16S907P083	16S907P083	5	34	07.04.2017	1.5
Fronteras S1	2017	C	16S907P088	16S907P088	5	34	07.04.2017	1
Fronteras S1	2017	C	16S907P096	16S907P096	5	34	07.04.2017	2
Fronteras S1	2017	C	16S907P106	16S907P106	5	34	07.04.2017	1.5
Fronteras S1	2017	C	16S907P108	16S907P108	5	34	07.04.2017	1
Fronteras S1	2017	C	16S907P110	16S907P110	5	34	07.04.2017	1.5
Fronteras S1	2017	C	16S907P120	16S907P120	5	34	07.04.2017	1.5
Fronteras S1	2017	C	16S907P129	16S907P129	5	34	07.04.2017	3
Fronteras S1	2017	C	16S907P135	16S907P135	5	34	07.04.2017	1
Fronteras S1	2017	C	16S907P136	16S907P136	5	34	07.04.2017	1.5
Fronteras S1	2017	C	16S907P142	16S907P142	5	34	07.04.2017	2.5
Fronteras S1	2017	C	16S907P144	16S907P144	5	34	07.04.2017	1.5
Fronteras S1	2017	C	04C018P004	04C018P004	6	36	07.18.2017	1
Fronteras S1	2017	C	05C165P001	05C165P001	6	36	07.18.2017	2
Fronteras S1	2017	C	08C132P608	Fronteras	6	36	07.18.2017	1.5
Fronteras S1	2017	C	16S907P002	16S907P002	6	36	07.18.2017	1
Fronteras S1	2017	C	16S907P010	16S907P010	6	36	07.18.2017	3.5
Fronteras S1	2017	C	16S907P017	16S907P017	6	36	07.18.2017	3
Fronteras S1	2017	C	16S907P042	16S907P042	6	36	07.18.2017	1
Fronteras S1	2017	C	16S907P043	16S907P043	6	36	07.18.2017	1
Fronteras S1	2017	C	16S907P049	16S907P049	6	36	07.18.2017	1
Fronteras S1	2017	C	16S907P057	16S907P057	6	36	07.18.2017	1
Fronteras S1	2017	C	16S907P063	16S907P063	6	36	07.18.2017	2.5
Fronteras S1	2017	C	16S907P072	16S907P072	6	36	07.18.2017	1.5
Fronteras S1	2017	C	16S907P082	16S907P082	6	36	07.18.2017	4
Fronteras S1	2017	C	16S907P083	16S907P083	6	36	07.18.2017	1.5
Fronteras S1	2017	C	16S907P088	16S907P088	6	36	07.18.2017	1
Fronteras S1	2017	C	16S907P096	16S907P096	6	36	07.18.2017	1.5
Fronteras S1	2017	C	16S907P106	16S907P106	6	36	07.18.2017	1.5
Fronteras S1	2017	C	16S907P108	16S907P108	6	36	07.18.2017	1
Fronteras S1	2017	C	16S907P110	16S907P110	6	36	07.18.2017	1.5
Fronteras S1	2017	C	16S907P120	16S907P120	6	36	07.18.2017	1.5
Fronteras S1	2017	C	16S907P129	16S907P129	6	36	07.18.2017	3.5
Fronteras S1	2017	C	16S907P135	16S907P135	6	36	07.18.2017	1
Fronteras S1	2017	C	16S907P136	16S907P136	6	36	07.18.2017	1.5
Fronteras S1	2017	C	16S907P142	16S907P142	6	36	07.18.2017	3.5
Fronteras S1	2017	C	16S907P144	16S907P144	6	36	07.18.2017	1
Fronteras S1	2017	D	04C018P004	04C018P004	1	26	05.09.2017	1
Fronteras S1	2017	D	05C165P001	05C165P001	1	26	05.09.2017	2
Fronteras S1	2017	D	08C132P608	Fronteras	1	26	05.09.2017	1
Fronteras S1	2017	D	16S907P004	16S907P004	1	26	05.09.2017	1
Fronteras S1	2017	D	16S907P005	16S907P005	1	26	05.09.2017	1
Fronteras S1	2017	D	16S907P008	16S907P008	1	26	05.09.2017	1
Fronteras S1	2017	D	16S907P018	16S907P018	1	26	05.09.2017	1
Fronteras S1	2017	D	16S907P026	16S907P026	1	26	05.09.2017	1
Fronteras S1	2017	D	16S907P038	16S907P038	1	26	05.09.2017	1
Fronteras S1	2017	D	16S907P045	16S907P045	1	26	05.09.2017	1
Fronteras S1	2017	D	16S907P056	16S907P056	1	26	05.09.2017	1.5
Fronteras S1	2017	D	16S907P066	16S907P066	1	26	05.09.2017	1
Fronteras S1	2017	D	16S907P068	16S907P068	1	26	05.09.2017	1
Fronteras S1	2017	D	16S907P074	16S907P074	1	26	05.09.2017	1
Fronteras S1	2017	D	16S907P077	16S907P077	1	26	05.09.2017	1
Fronteras S1	2017	D	16S907P085	16S907P085	1	26	05.09.2017	NA
Fronteras S1	2017	D	16S907P086	16S907P086	1	26	05.09.2017	1
Fronteras S1	2017	D	16S907P089	16S907P089	1	26	05.09.2017	1
Fronteras S1	2017	D	16S907P107	16S907P107	1	26	05.09.2017	1
Fronteras S1	2017	D	16S907P113	16S907P113	1	26	05.09.2017	1
Fronteras S1	2017	D	16S907P114	16S907P114	1	26	05.09.2017	1
Fronteras S1	2017	D	16S907P124	16S907P124	1	26	05.09.2017	1
Fronteras S1	2017	D	16S907P132	16S907P132	1	26	05.09.2017	1
Fronteras S1	2017	D	16S907P137	16S907P137	1	26	05.09.2017	1
Fronteras S1	2017	D	16S907P138	16S907P138	1	26	05.09.2017	1
Fronteras S1	2017	D	16S907P139	16S907P139	1	26	05.09.2017	1
Fronteras S1	2017	D	16S907P141	16S907P141	1	26	05.09.2017	1
Fronteras S1	2017	D	04C018P004	04C018P004	2	28	05.23.2017	1
Fronteras S1	2017	D	05C165P001	05C165P001	2	28	05.23.2017	2
Fronteras S1	2017	D	08C132P608	Fronteras	2	28	05.23.2017	1
Fronteras S1	2017	D	16S907P004	16S907P004	2	28	05.23.2017	1
Fronteras S1	2017	D	16S907P005	16S907P005	2	28	05.23.2017	1
Fronteras S1	2017	D	16S907P008	16S907P008	2	28	05.23.2017	1
Fronteras S1	2017	D	16S907P018	16S907P018	2	28	05.23.2017	1
Fronteras S1	2017	D	16S907P026	16S907P026	2	28	05.23.2017	1
Fronteras S1	2017	D	16S907P038	16S907P038	2	28	05.23.2017	1
Fronteras S1	2017	D	16S907P045	16S907P045	2	28	05.23.2017	1
Fronteras S1	2017	D	16S907P056	16S907P056	2	28	05.23.2017	1.5
Fronteras S1	2017	D	16S907P066	16S907P066	2	28	05.23.2017	1
Fronteras S1	2017	D	16S907P068	16S907P068	2	28	05.23.2017	1
Fronteras S1	2017	D	16S907P074	16S907P074	2	28	05.23.2017	1
Fronteras S1	2017	D	16S907P077	16S907P077	2	28	05.23.2017	1
Fronteras S1	2017	D	16S907P085	16S907P085	2	28	05.23.2017	NA
Fronteras S1	2017	D	16S907P086	16S907P086	2	28	05.23.2017	1
Fronteras S1	2017	D	16S907P089	16S907P089	2	28	05.23.2017	1
Fronteras S1	2017	D	16S907P107	16S907P107	2	28	05.23.2017	1
Fronteras S1	2017	D	16S907P113	16S907P113	2	28	05.23.2017	1
Fronteras S1	2017	D	16S907P114	16S907P114	2	28	05.23.2017	1
Fronteras S1	2017	D	16S907P124	16S907P124	2	28	05.23.2017	1
Fronteras S1	2017	D	16S907P132	16S907P132	2	28	05.23.2017	1
Fronteras S1	2017	D	16S907P137	16S907P137	2	28	05.23.2017	1
Fronteras S1	2017	D	16S907P138	16S907P138	2	28	05.23.2017	1
Fronteras S1	2017	D	16S907P139	16S907P139	2	28	05.23.2017	1
Fronteras S1	2017	D	16S907P141	16S907P141	2	28	05.23.2017	1
Fronteras S1	2017	D	04C018P004	04C018P004	3	30	06.05.2017	1
Fronteras S1	2017	D	05C165P001	05C165P001	3	30	06.05.2017	2
Fronteras S1	2017	D	08C132P608	Fronteras	3	30	06.05.2017	1
Fronteras S1	2017	D	16S907P004	16S907P004	3	30	06.05.2017	1
Fronteras S1	2017	D	16S907P005	16S907P005	3	30	06.05.2017	1
Fronteras S1	2017	D	16S907P008	16S907P008	3	30	06.05.2017	1
Fronteras S1	2017	D	16S907P018	16S907P018	3	30	06.05.2017	1
Fronteras S1	2017	D	16S907P026	16S907P026	3	30	06.05.2017	1
Fronteras S1	2017	D	16S907P038	16S907P038	3	30	06.05.2017	1
Fronteras S1	2017	D	16S907P045	16S907P045	3	30	06.05.2017	1
Fronteras S1	2017	D	16S907P056	16S907P056	3	30	06.05.2017	1.5
Fronteras S1	2017	D	16S907P066	16S907P066	3	30	06.05.2017	1
Fronteras S1	2017	D	16S907P068	16S907P068	3	30	06.05.2017	1
Fronteras S1	2017	D	16S907P074	16S907P074	3	30	06.05.2017	1
Fronteras S1	2017	D	16S907P077	16S907P077	3	30	06.05.2017	1
Fronteras S1	2017	D	16S907P085	16S907P085	3	30	06.05.2017	NA
Fronteras S1	2017	D	16S907P086	16S907P086	3	30	06.05.2017	1
Fronteras S1	2017	D	16S907P089	16S907P089	3	30	06.05.2017	1
Fronteras S1	2017	D	16S907P107	16S907P107	3	30	06.05.2017	1
Fronteras S1	2017	D	16S907P113	16S907P113	3	30	06.05.2017	1
Fronteras S1	2017	D	16S907P114	16S907P114	3	30	06.05.2017	1
Fronteras S1	2017	D	16S907P124	16S907P124	3	30	06.05.2017	1
Fronteras S1	2017	D	16S907P132	16S907P132	3	30	06.05.2017	1
Fronteras S1	2017	D	16S907P137	16S907P137	3	30	06.05.2017	1
Fronteras S1	2017	D	16S907P138	16S907P138	3	30	06.05.2017	1
Fronteras S1	2017	D	16S907P139	16S907P139	3	30	06.05.2017	1
Fronteras S1	2017	D	16S907P141	16S907P141	3	30	06.05.2017	1
Fronteras S1	2017	D	04C018P004	04C018P004	4	32	06.16.2017	1
Fronteras S1	2017	D	05C165P001	05C165P001	4	32	06.16.2017	5
Fronteras S1	2017	D	08C132P608	Fronteras	4	32	06.16.2017	1
Fronteras S1	2017	D	16S907P004	16S907P004	4	32	06.16.2017	1
Fronteras S1	2017	D	16S907P005	16S907P005	4	32	06.16.2017	1
Fronteras S1	2017	D	16S907P008	16S907P008	4	32	06.16.2017	1
Fronteras S1	2017	D	16S907P018	16S907P018	4	32	06.16.2017	2.5
Fronteras S1	2017	D	16S907P026	16S907P026	4	32	06.16.2017	1
Fronteras S1	2017	D	16S907P038	16S907P038	4	32	06.16.2017	1
Fronteras S1	2017	D	16S907P045	16S907P045	4	32	06.16.2017	1
Fronteras S1	2017	D	16S907P056	16S907P056	4	32	06.16.2017	1.5
Fronteras S1	2017	D	16S907P066	16S907P066	4	32	06.16.2017	2.5
Fronteras S1	2017	D	16S907P068	16S907P068	4	32	06.16.2017	1
Fronteras S1	2017	D	16S907P074	16S907P074	4	32	06.16.2017	1.5
Fronteras S1	2017	D	16S907P077	16S907P077	4	32	06.16.2017	1
Fronteras S1	2017	D	16S907P085	16S907P085	4	32	06.16.2017	NA
Fronteras S1	2017	D	16S907P086	16S907P086	4	32	06.16.2017	1.5
Fronteras S1	2017	D	16S907P089	16S907P089	4	32	06.16.2017	1.5
Fronteras S1	2017	D	16S907P107	16S907P107	4	32	06.16.2017	1
Fronteras S1	2017	D	16S907P113	16S907P113	4	32	06.16.2017	1.5
Fronteras S1	2017	D	16S907P114	16S907P114	4	32	06.16.2017	1
Fronteras S1	2017	D	16S907P124	16S907P124	4	32	06.16.2017	1
Fronteras S1	2017	D	16S907P132	16S907P132	4	32	06.16.2017	1
Fronteras S1	2017	D	16S907P137	16S907P137	4	32	06.16.2017	2.5
Fronteras S1	2017	D	16S907P138	16S907P138	4	32	06.16.2017	1
Fronteras S1	2017	D	16S907P139	16S907P139	4	32	06.16.2017	1
Fronteras S1	2017	D	16S907P141	16S907P141	4	32	06.16.2017	1
Fronteras S1	2017	D	04C018P004	04C018P004	5	34	07.04.2017	1.5
Fronteras S1	2017	D	05C165P001	05C165P001	5	34	07.04.2017	5
Fronteras S1	2017	D	08C132P608	Fronteras	5	34	07.04.2017	1.5
Fronteras S1	2017	D	16S907P004	16S907P004	5	34	07.04.2017	2.5
Fronteras S1	2017	D	16S907P005	16S907P005	5	34	07.04.2017	1
Fronteras S1	2017	D	16S907P008	16S907P008	5	34	07.04.2017	1.5
Fronteras S1	2017	D	16S907P018	16S907P018	5	34	07.04.2017	2.5
Fronteras S1	2017	D	16S907P026	16S907P026	5	34	07.04.2017	1
Fronteras S1	2017	D	16S907P038	16S907P038	5	34	07.04.2017	1
Fronteras S1	2017	D	16S907P045	16S907P045	5	34	07.04.2017	1.5
Fronteras S1	2017	D	16S907P056	16S907P056	5	34	07.04.2017	1.5
Fronteras S1	2017	D	16S907P066	16S907P066	5	34	07.04.2017	2.5
Fronteras S1	2017	D	16S907P068	16S907P068	5	34	07.04.2017	1.5
Fronteras S1	2017	D	16S907P074	16S907P074	5	34	07.04.2017	1.5
Fronteras S1	2017	D	16S907P077	16S907P077	5	34	07.04.2017	1.5
Fronteras S1	2017	D	16S907P085	16S907P085	5	34	07.04.2017	NA
Fronteras S1	2017	D	16S907P086	16S907P086	5	34	07.04.2017	2.5
Fronteras S1	2017	D	16S907P089	16S907P089	5	34	07.04.2017	1.5
Fronteras S1	2017	D	16S907P107	16S907P107	5	34	07.04.2017	1
Fronteras S1	2017	D	16S907P113	16S907P113	5	34	07.04.2017	1.5
Fronteras S1	2017	D	16S907P114	16S907P114	5	34	07.04.2017	1
Fronteras S1	2017	D	16S907P124	16S907P124	5	34	07.04.2017	1
Fronteras S1	2017	D	16S907P132	16S907P132	5	34	07.04.2017	1
Fronteras S1	2017	D	16S907P137	16S907P137	5	34	07.04.2017	1.5
Fronteras S1	2017	D	16S907P138	16S907P138	5	34	07.04.2017	1
Fronteras S1	2017	D	16S907P139	16S907P139	5	34	07.04.2017	1
Fronteras S1	2017	D	16S907P141	16S907P141	5	34	07.04.2017	1.5
Fronteras S1	2017	D	04C018P004	04C018P004	6	36	07.18.2017	1
Fronteras S1	2017	D	05C165P001	05C165P001	6	36	07.18.2017	5
Fronteras S1	2017	D	08C132P608	Fronteras	6	36	07.18.2017	1.5
Fronteras S1	2017	D	16S907P004	16S907P004	6	36	07.18.2017	3
Fronteras S1	2017	D	16S907P005	16S907P005	6	36	07.18.2017	2.5
Fronteras S1	2017	D	16S907P008	16S907P008	6	36	07.18.2017	1.5
Fronteras S1	2017	D	16S907P018	16S907P018	6	36	07.18.2017	3.5
Fronteras S1	2017	D	16S907P026	16S907P026	6	36	07.18.2017	1
Fronteras S1	2017	D	16S907P038	16S907P038	6	36	07.18.2017	1
Fronteras S1	2017	D	16S907P045	16S907P045	6	36	07.18.2017	1.5
Fronteras S1	2017	D	16S907P056	16S907P056	6	36	07.18.2017	1
Fronteras S1	2017	D	16S907P066	16S907P066	6	36	07.18.2017	3.5
Fronteras S1	2017	D	16S907P068	16S907P068	6	36	07.18.2017	2.5
Fronteras S1	2017	D	16S907P074	16S907P074	6	36	07.18.2017	2.5
Fronteras S1	2017	D	16S907P077	16S907P077	6	36	07.18.2017	1.5
Fronteras S1	2017	D	16S907P085	16S907P085	6	36	07.18.2017	NA
Fronteras S1	2017	D	16S907P086	16S907P086	6	36	07.18.2017	2.5
Fronteras S1	2017	D	16S907P089	16S907P089	6	36	07.18.2017	1.5
Fronteras S1	2017	D	16S907P107	16S907P107	6	36	07.18.2017	1.5
Fronteras S1	2017	D	16S907P113	16S907P113	6	36	07.18.2017	3
Fronteras S1	2017	D	16S907P114	16S907P114	6	36	07.18.2017	1
Fronteras S1	2017	D	16S907P124	16S907P124	6	36	07.18.2017	2.5
Fronteras S1	2017	D	16S907P132	16S907P132	6	36	07.18.2017	3
Fronteras S1	2017	D	16S907P137	16S907P137	6	36	07.18.2017	1.5
Fronteras S1	2017	D	16S907P138	16S907P138	6	36	07.18.2017	1
Fronteras S1	2017	D	16S907P139	16S907P139	6	36	07.18.2017	1
Fronteras S1	2017	D	16S907P141	16S907P141	6	36	07.18.2017	1.5
